# Supplementary material for: Incidence of occupational injuries and diseases among seafarers: a descriptive epidemiological study based on contacts from onboard ships to the Italian Telemedical Maritime Assistance Service in Rome, Italy
Source: PubMed Central journal article supplement — BMJ Open. 2021 Mar 16;11(3):e044633. doi: 10.1136/bmjopen-2020-044633 (PMC7970292; doi:10.1136/bmjopen-2020-044633), 2021-03-16
Supplement: bmjopen-2020-044633.draft_revisions.pdf [file bmjopen-2020-044633.draft_revisions.pdf]

# BMJ Open

BMJ Open is committed to open peer review. As part of this commitment we make the peer review history of every article we publish publicly available.

When an article is published we post the peer reviewers' comments and the authors' responses online. We also post the versions of the paper that were used during peer review. These are the versions that the peer review comments apply to.

The versions of the paper that follow are the versions that were submitted during the peer review process. They are not the versions of record or the final published versions. They should not be cited or distributed as the published version of this manuscript.

BMJ Open is an open access journal and the full, final, typeset and author-corrected version of record of the manuscript is available on our site with no access controls, subscription charges or pay-per-view fees (<http://bmjopen.bmj.com>).

If you have any questions on BMJ Open's open peer review process please email [info.bmjopen@bmj.com](mailto:info.bmjopen@bmj.com)

# BMJ Open

## Epidemiology of occupational injuries and diseases among seafarers: Implications for prevention

|                               |                                                                                                                                                                                                                                                                                                                                                                                                                                                                                                                                                                                                                    |
|-------------------------------|--------------------------------------------------------------------------------------------------------------------------------------------------------------------------------------------------------------------------------------------------------------------------------------------------------------------------------------------------------------------------------------------------------------------------------------------------------------------------------------------------------------------------------------------------------------------------------------------------------------------|
| Journal:                      | <i>BMJ Open</i>                                                                                                                                                                                                                                                                                                                                                                                                                                                                                                                                                                                                    |
| Manuscript ID                 | bmjopen-2020-044633                                                                                                                                                                                                                                                                                                                                                                                                                                                                                                                                                                                                |
| Article Type:                 | Original research                                                                                                                                                                                                                                                                                                                                                                                                                                                                                                                                                                                                  |
| Date Submitted by the Author: | 08-Sep-2020                                                                                                                                                                                                                                                                                                                                                                                                                                                                                                                                                                                                        |
| Complete List of Authors:     | Sagaro, Getu Gamo; University of Camerino, Telemedicine and Telepharmacy Center, School of Medicinal and Health Products Sciences; University of Camerino<br>di Canio, Marzio; Research Department, International Radio Medical Centre (CIRM),<br>Battineni, Gopi ; University of Camerino, Telemedicine and Telepharmacy Center, School of Medicinal and Health Products Sciences<br>Samad, Marc; CMA-CGM, Tour CMA CGM, 4 Quai d'Arenc, 13002 Marseille<br>Amenta, Francesco; Universita degli Studi di Camerino Scuola di Scienze del Farmaco e dei Prodotti della Salute, Telemedicine and Telepharmacy Centre |
| Keywords:                     | Epidemiology < TROPICAL MEDICINE, EPIDEMIOLOGY, Epidemiology < INFECTIOUS DISEASES, OCCUPATIONAL & INDUSTRIAL MEDICINE                                                                                                                                                                                                                                                                                                                                                                                                                                                                                             |
|                               |                                                                                                                                                                                                                                                                                                                                                                                                                                                                                                                                                                                                                    |

SCHOLARONE™  
Manuscripts

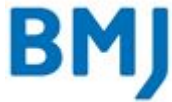

I, the Submitting Author has the right to grant and does grant on behalf of all authors of the Work (as defined in the below author licence), an exclusive licence and/or a non-exclusive licence for contributions from authors who are: i) UK Crown employees; ii) where BMJ has agreed a CC-BY licence shall apply, and/or iii) in accordance with the terms applicable for US Federal Government officers or employees acting as part of their official duties; on a worldwide, perpetual, irrevocable, royalty-free basis to BMJ Publishing Group Ltd ("BMJ") its licensees and where the relevant Journal is co-owned by BMJ to the co-owners of the Journal, to publish the Work in this journal and any other BMJ products and to exploit all rights, as set out in our [licence](#).

The Submitting Author accepts and understands that any supply made under these terms is made by BMJ to the Submitting Author unless you are acting as an employee on behalf of your employer or a postgraduate student of an affiliated institution which is paying any applicable article publishing charge ("APC") for Open Access articles. Where the Submitting Author wishes to make the Work available on an Open Access basis (and intends to pay the relevant APC), the terms of reuse of such Open Access shall be governed by a Creative Commons licence – details of these licences and which [Creative Commons](#) licence will apply to this Work are set out in our licence referred to above.

Other than as permitted in any relevant BMJ Author's Self Archiving Policies, I confirm this Work has not been accepted for publication elsewhere, is not being considered for publication elsewhere and does not duplicate material already published. I confirm all authors consent to publication of this Work and authorise the granting of this licence.

1  
2  
3 **Epidemiology of occupational injuries and diseases among seafarers:**  
4  
5 **Implications for prevention**  
6

7 *Getu Gamo Sagaro*<sup>1\*</sup>, *Marzio Di Canio*<sup>2</sup>, *Gopi Battenini*<sup>1</sup>, *Marc Abdul Samad*<sup>3</sup> and *Francesco*  
8 *Amenta*<sup>1,2</sup>  
9

10  
11 <sup>1</sup>Telemedicine and Telepharmacy Center, School of Medicinal and Health Products Sciences,  
12 University of Camerino, 62032 Camerino, Italy  
13

14  
15 <sup>2</sup>Research Department, Internazionale Radio Medical Center (C.I.R.M), 00144 Rome, Italy  
16

17 <sup>3</sup>CMA-CGM, Tour CMA CGM, 4 Quai d'Arenc, 13002 Marseille, France  
18  
19  
20  
21  
22

23 **Corresponding Author:**  
24

25 Getu Gamo Sagaro  
26 Telemedicine and Telepharmacy Center  
27 School of Medicinal and Health Products Sciences,  
28 University of Camerino  
29 62032 Camerino MC, Italy  
30 E-mail: [getugamo.sagaro@unicam.it](mailto:getugamo.sagaro@unicam.it)  
31  
32  
33  
34  
35  
36  
37  
38  
39  
40  
41  
42  
43  
44  
45  
46  
47  
48  
49  
50  
51  
52  
53  
54  
55  
56  
57  
58  
59  
60

## Abstract

**Objectives:** Workers at sea have high mortality, injuries, and illnesses, and work in a hazardous environment compared to ashore workers. The present study was designed to measure the incidence of diseases and occupational injuries among seafarers and to quantify the contribution of rank and duties on board on seafarers' illnesses and injuries rates.

**Methods:** A retrospective study was employed, and the study used the International Radio Medical Center (C.I.R.M) database of seafarer's injuries and diseases from 2016 to 2019. The chi-square or Fisher's tests were used to determine differences in rank and worksite groups. The Z-test for proportions and independent samples t-test were used to compare proportions and means, respectively. P-value <0.05 was considered statistically significant. The STATA software version 15 was used for data analysis.

**Results:** The total disease rate was 25 per 1,000 seafarer-years and the overall injury rate was 6.31 per 1,000 seafarer-years over the four years study period. Non-officers had significantly higher risk for gastrointestinal [IRR: 2.12 (95% CI) = 1.13 – 4.26; p = 0.011], dermatological [IRR: 3.66 (95% CI) = 1.27 – 14.42; p = 0.006] and musculoskeletal [IRR: 2.25 (95% CI) = 1.11–5.05; p = 0.015] disorders compared to officers. Deck workers had 3.25 times higher risk for wrist and hand injuries compared to engine workers.

**Conclusions:** In general, non-officers and deck workers had a higher risk for diseases and injuries. Future studies should consider risk factors for injury and illness among seafarers in order to propose further preventive measures.

**Keywords:** Epidemiology, Injury, Disease, Seafarer, Rank, Occupation

### Strengths and limitations of this study

- ✚ This study measured the incidence rates of injury and disease for rank and occupation groups
- ✚ The study measured the contribution of differences in rank and duty to the rates of injury and illness of seafarers on board merchant ships.
- ✚ The estimated at-risk seafarer population was used in the analysis due to the lack of information on actual at-risk seafarer population.

For peer review only

## 1. INTRODUCTION

In 2015, more than 1.6 million seafarers served worldwide, of which 774,000 and 873,500 were officers and ratings, respectively<sup>1</sup>. It is estimated that nearly 65,000 deep-sea merchant ships operate around the world, carrying more than 1.6 million sailing seafarers<sup>1,2</sup>.

In general, work onboard ships are broadly grouped by working areas, including deck, engine, and galley<sup>3</sup>. Shipping is one of the most widespread transportation systems, and more than 88% of the world's trade utilizes it<sup>4,5</sup>. Workers at sea have high mortality, injuries, and illnesses rate compared to ashore workers<sup>5</sup>. Sailing seafarers have one in eleven chances of being injured on duty on board<sup>6</sup>, and sometimes physical injuries can be acute and a primary cause of disability. Different studies have reported higher mortality and morbidity rates onboard merchant ships when compared to the land occupation. For instance, a study conducted on the British merchant fleet reported that between 2003 to 2012, the fatal incident rate in shipping was 21 times higher than that in the general British workforce, 4.7 times higher than that in the construction industry and 13 times higher than in manufacturing<sup>7</sup>. Mortality in Danish seafarers onboard ships was found to be 11.5 times higher compared to Danish male ashore workers between 1986 to 1993<sup>8</sup>. Moreover, seafarers working on board of British merchant ships had 23.9 times higher risk of death compared to all workers in Great Britain<sup>9</sup>. The risk of death is 25 times higher for maritime transport than for air transport, according to the death accounts for every 100 km<sup>10</sup>.

The identification of the potential area of incidents and the assessment of the probability of the occurrence of occupational medical events (illnesses and injuries), may assure the availability of treatment and the development of prevention strategies to reduce the rate of diseases and/or injuries among seafarers and to improve health outcomes<sup>11-13</sup>. Unfortunately, due to the scarcity of evidence-based information on the incidence of occupational diseases and injuries onboard ships, preventive measures in the maritime environment received less attention compared to other working activities<sup>14</sup>. On the other hand, determinants of onboard merchant ship illnesses, injuries, disability, and fatalities, remain not adequately studied due to the not easy access of seafarer's medical data<sup>3,13,15</sup>. Previous studies have reported that non-officers have a higher risk for diseases and injuries compared to officers<sup>3,15-18</sup>, but most of these studies considered only occupational groups.

The exposure to the work-related risk of officers and non-officers working in different ship areas such as deck, engine, and galley is not similar, because they attend different duties in different working hours<sup>19</sup>. For instance, workers in the engine room are exposed to work-

1  
2  
3 related risks such as noise, vibration, and heat or pollutants during their working hours<sup>19,20</sup>.  
4 In contrast, people working in the deck, as well as in the galley, are potentially exposed to  
5 different work-related risks<sup>19</sup>. Because of the different areas of activity and associated burden,  
6 the likelihood of illnesses and the occurrence of injuries can differ, and evidence-based  
7 information can be used for preventive measures.  
8  
9

10  
11 The aim of present study was to analyze the incidence of occupational diseases and injuries  
12 among seafarers by worksite and rank groups. This work provides factual information on the  
13 risk of illnesses and injuries between the worksite group as well as the rank. The results  
14 obtained can be used to prioritize occupational health risks and guide the development of  
15 preventative measures onboard merchant ships.  
16  
17  
18

## 19 20 **2. METHODS**

### 21 22 **2.1. Study design, data source, and collection procedure**

23  
24 We employed a retrospective study design and received data from the Centro Internazionale  
25 Radio Medico (International Radio Medical Centre, C.I.R.M) database. C.I.R.M is the Italian  
26 Telemedical Maritime Assistance Service (TMAS) and represents one of the oldest and best  
27 known TMAS worldwide. C.I.R.M operates since 1935 and has assisted more than 100,000  
28 seafarers onboard ships<sup>21</sup>. For this particular study, we have used CMA CGM group vessels'  
29 occupational illnesses, and injuries claim records. CMA CGM shipping company has made an  
30 agreement with C.I.R.M in January 2016 to identify new approaches to provide high-quality  
31 telemedical assistance for seafarers. In view of this agreement, data provided for medical  
32 assistance on board ships of the company are more detailed and, therefore, can be used for  
33 a basic epidemiological analysis.  
34  
35  
36  
37  
38  
39  
40

41 Work-related diseases are illnesses predominantly due to physical, chemical, and biological  
42 factors associated with merchant seafaring occupations, and they are recorded in the CIRM  
43 database according to the World Health Organization (WHO) International Classification of  
44 Disease 10<sup>th</sup> revised version (ICD 10). An occupational injury is defined as a sudden,  
45 unexpected, and unwanted forceful event due to an external cause onboard merchant  
46 seafaring occupation. In the C.I.R.M database, injuries also are recorded according to the  
47 WHO ICD 10<sup>th</sup> revised version (chapter XIX, S00-S99, and T00-T98).  
48  
49  
50  
51

52  
53 The classification of both illnesses and occupational injuries was made according to the prompt  
54 diagnosis and recorded medical datasets in the C.I.R.M database. The attributes included in  
55  
56  
57  
58  
59  
60



1  
2  
3 the database were age, gender, rank, working site, type of vessel, means of contacts, days,  
4 months, and years of diagnosis. Disease and injury diagnosis affected body parts, and ICD  
5 10 for both diseases and injuries were included in the dataset. For the analysis of the incidence  
6 of illnesses and injuries, the rank and worksite groups were the parameters considered.  
7  
8  
9

10 An estimated total number of at-risk seafarer population was calculated by multiplying the  
11 number of vessels during the study period by the average number of crew members per  
12 vessel. As a result, large ships, including general cargo, tankers, and bulk carriers, have an  
13 average size of 20-25 crew members per ship<sup>3</sup>. The CMA CGM shipping company handles only  
14 container ships, with an average of 25 crew members per ship. Regarding rank distribution  
15 per ship, nine officers and sixteen non-officers (ratings) serve onboard. In respect of worksite,  
16 ten deck workers, thirteen engine workers and two galleys (catering) workers are in service  
17 per vessel. The average number of the crew size, their rank as well as worksite distribution  
18 per large vessel based on the knowledge of industry norm were calculated.  
19  
20  
21  
22  
23

24 The number of CMA CGM container ships contracted over four years from January 2016 to  
25 December 31, 2019, was 539. An estimated number of the total at-risk seafarer population  
26 for worksite and rank was determined by multiplying the total number of vessels over four  
27 years by occupation and rank distribution per ship. The total number of seafarers at risk was  
28 adjusted proportionally to the number of seafarers in the dataset for whom information on  
29 occupation and rank was available. Then, worksite and rank specific incidence rates were  
30 calculated by dividing the number of cases by the total at-risk seafarer population for each  
31 occupation and rank over four years. Moreover, the incidence rate ratio (IRR) and 95%  
32 confidence interval were performed to quantify the rate difference between rank groups as  
33 well as worksite groups. The outcome of rates was expressed as per 1,000 seafarer-years.  
34  
35  
36  
37  
38  
39  
40

## 41 **2.2. Statistical analysis**

42  
43 Descriptive analysis of seafarer's demographic variables, including age, rank, and worksite,  
44 was done to evaluate the distribution of occupational injuries and diseases. Rank was stratified  
45 by officers (deck and engine officers) and non-officers (deck and engine ratings, and galley).  
46 The worksite was also categorized into three groups, including the deck, engine, and galley.  
47 The Chi-square or Fisher's exact test was used to determine distributional differences in rank  
48 and worksite groups. The Z- test and independent-sample t-tests to compare mean and  
49 proportions, respectively, were used. A two-tailed  $P < 0.05$  was considered statistically  
50 significant. The STATA software version 15 was used for data analysis.  
51  
52  
53  
54  
55  
56  
57  
58  
59  
60

### 2.3. Patient and public involvement

Patients and public were not involved in the study

## 3. RESULTS

### 3.1. Socio-demographic characteristics

Overall, 423 patients have assisted onboard CMA CGM group container ships over the four years study period. Of these, 338 (80%) and 85 (20%) were diseases and injuries, respectively. The mean age (SD) of seafarers with illnesses and injuries was  $40.37 \pm 12.52$  years and  $38.39 \pm 12.88$  years, respectively. Diseases occurred almost seven times more frequently in the deck workers compared to galley workers by worksite (Table 1).

**Table 1. Characteristics of seafarers with diseases and injuries from 2016 to 2019 (n = 423)**

| Variables        | Medical Events             |                          | Total (n = 423)<br>n (%) |
|------------------|----------------------------|--------------------------|--------------------------|
|                  | Disease (n = 338)<br>n (%) | Injury (n = 85)<br>n (%) |                          |
| <b>Age group</b> |                            |                          |                          |
| ≤ 30             | 89 (26.3)                  | 31 (36.5)                | 120 (28.4)               |
| 31 – 40          | 96 (28.4)                  | 22 (25.9)                | 118 (27.9)               |
| 41 – 50          | 78 (23.1)                  | 15 (17.6)                | 93 (22)                  |
| ≥51              | 75 (22.2)                  | 17 (20)                  | 92 (21.7)                |
| Mean (SD)        | $40.37 \pm 12.52$          | $38.39 \pm 12.88$        | $39.97 \pm 12.60$        |
| <b>Rank</b>      |                            |                          |                          |
| Officer          | 84 (24.9)                  | 19 (22.4)                | 103 (24.4)               |
| Non-officer      | 217 (64.2)                 | 59 (69.4)                | 276 (65.2)               |
| Unknown          | 37 (10.9)                  | 7 (8.2)                  | 44 (10.4)                |
| <b>Worksite</b>  |                            |                          |                          |
| Deck             | 171 (50.6)                 | 43 (50.6)                | 214 (50.6)               |
| Engine           | 105 (31.1)                 | 28 (33)                  | 133 (31.4)               |

|         |           |         |           |
|---------|-----------|---------|-----------|
| Galley  | 25 (7.4)  | 7 (8.2) | 32 (7.6)  |
| Unknown | 37 (10.9) | 7 (8.2) | 44 (10.4) |

The most frequent causes of illnesses onboard ships were gastrointestinal disorders (n = 71, 21.30%) followed by musculoskeletal (n = 52, 15.38%) and cardiovascular diseases (n = 51, 15%) (Figure 1). In general, out of the 85 injuries, 29.40% were wrist and hand injuries, 21.20% were knee/lower leg injuries, 12.90% were head/eye injuries, 11.80% were lower back/lumbar spine injuries, 8.2% were thorax/neck injuries (Figure 2).

### 3.2. Rank-specific incidence rates of diseases and occupational injuries

Non-officers had the highest both total disease (28.26 per 1,000 seafarer-years) and injury (7.5 per 1,000 seafarer-years) rates. IRR was calculated to quantify the difference in the rate of diseases and injuries between the seafarers' rank group. As a result, non-officers had significantly higher rates of gastrointestinal, musculoskeletal, and dermatological disorders compared to officers. Concerning injuries, non-officers had 1.75 times higher risk for total injuries compared to officers (Table 2).

**Table 2. Incidence Rate of diseases and occupational injuries by the seafarer rank from 2016 to 2019 (n = 379)**

| Medical events           | Officer |             | Non-officer |             | Difference |             | P-value |
|--------------------------|---------|-------------|-------------|-------------|------------|-------------|---------|
|                          | Rate    | 95% CI      | Rate        | 95% CI      | IRR        | 95% CI      |         |
| <b>Diseases</b>          |         |             |             |             |            |             |         |
| Gastrointestinal         | 3.1     | 1.64 - 5.24 | 6.51        | 4.82 - 8.59 | 2.12       | 1.13-4.26   | 0.011   |
| Musculoskeletal          | 2.14    | 1.03 - 3.94 | 4.82        | 3.45 - 6.56 | 2.25       | 1.11-5.05   | 0.015   |
| Cardiovascular           | 2.69    | 1.29 - 4.95 | 4.39        | 2.95 - 6.31 | 1.63       | 0.77 - 3.75 | 0.179   |
| Non-specific             | 2.86    | 1.47 - 4.99 | 2.68        | 1.64 - 4.14 | 0.94       | 0.44-2.10   | 0.849   |
| Respiratory              | 2.59    | 1.29 - 4.63 | 2.25        | 1.31 - 3.60 | 0.87       | 0.38 - 2.05 | 0.711   |
| Dermatological           | 0.88    | 0.24 - 2.25 | 3.22        | 2.10 - 4.71 | 3.66       | 1.27-14.42  | 0.006   |
| Genitourinary            | 2.06    | 0.99 - 3.78 | 1.27        | 0.64 - 2.28 | 0.62       | 0.24-1.63   | 0.280   |
| Eye/Adnexa               | 1.31    | 0.48 - 2.86 | 1.23        | 0.59 - 2.27 | 0.94       | 0.31-3.14   | 0.887   |
| Infectious and parasitic | 1.26    | 0.4 - 2.94  | 0.57        | 0.15 - 1.45 | 0.45       | 0.09-2.09   | 0.250   |
| Ear/Mastoid              | 0.41    | 0.05 - 1.49 | 0.46        | 0.13 - 1.19 | 1.13       | 0.16-12.44  | 0.927   |
| Neurological             | -       | -           | 0.46        | 0.13 - 1.19 | -          | -           | -       |

|                         |       |               |       |               |      |                 |       |
|-------------------------|-------|---------------|-------|---------------|------|-----------------|-------|
| Mental/behavioral       | 0.21  | 0.005 - 1.14  | 0.35  | 0.07 - 1.02   | 1.69 | 0.14-88.59      | 0.713 |
| Total                   | 19.44 | 15.54 - 24.02 | 28.26 | 24.66 - 32.21 | 1.45 | 1.12-1.89       | 0.003 |
| <b>Injury</b>           |       |               |       |               |      |                 |       |
| Wrist and Hand          | 1.72  | 0.74 - 3.38   | 1.93  | 1.11 - 3.14   | 1.13 | 0.45 - 3.03     | 0.801 |
| Knee/lower leg          | 0.44  | 0.05 - 1.57   | 1.84  | 1.03 - 3.03   | 4.21 | 1.01 -<br>38.01 | 0.032 |
| Head/Eye                | 0.76  | 0.16 - 2.21   | 0.85  | 0.31 - 1.85   | 1.13 | 0.24-6.95       | 0.898 |
| Lower back/lumbar spine | 0.77  | 0.16 - 2.25   | 0.73  | 0.24 - 1.69   | 0.94 | 0.18-6.07       | 0.911 |
| Thorax/neck             | 0.21  | 0.005 - 1.14  | 0.69  | 0.25 - 1.51   | 3.37 | 0.41-155        | 0.261 |
| Skin burn               | 0.21  | 0.005 - 1.14  | 0.58  | 0.19 - 1.35   | 2.81 | 0.31-133        | 0.369 |
| Upper arm/shoulder      | 0.27  | 0.006 - 1.53  | 0.46  | 0.09 - 1.35   | 1.69 | 0.14-88.6       | 0.71  |
| Elbow/forearm           | -     | -             | 0.46  | 0.13 - 1.18   | 0    | 0               | -     |
| <b>Total</b>            | 4.3   | 2.57-6.66     | 7.5   | 5.68 - 9.61   | 1.75 | 1.03 - 3.10     | 0.029 |

\*IRR = Incidence rate ratio and calculated as the rate of non-officer/rate of officer

### 3.3. Worksite-specific incidence rates of diseases and occupational injuries

Table 3 summarizes the rates of illnesses and injuries per seafarer worksite groups. Deck workers had the highest rates of both overall diseases (35.63 per 1,000 seafarer-years) and total injuries (8.69 per 1,000 seafarer-years).

| Medical events           | Deck |             | Engine |             | Galley |              |
|--------------------------|------|-------------|--------|-------------|--------|--------------|
|                          | Rate | 95% CI      | Rate   | 95% CI      | Rate   | 95% CI       |
| <b>Diseases</b>          |      |             |        |             |        |              |
| Gastrointestinal         | 7.01 | 4.83 - 9.83 | 3.76   | 2.38 - 5.63 | 6.37   | 2.34-13.83   |
| Musculoskeletal          | 5.40 | 3.59 - 7.79 | 2.52   | 1.47 - 4.04 | 4.82   | 1.56-11.22   |
| Cardiovascular           | 6.06 | 3.93 - 8.94 | 1.86   | 0.89 - 3.43 | 4.85   | 1.32-12.38   |
| Non-specific             | 3.86 | 2.29 - 6.09 | 2.15   | 1.14-3.66   | 1.07   | 0.03 - 5.96  |
| Respiratory              | 3.82 | 2.26 - 6.02 | 1.46   | 0.67 - 2.78 | 1.06   | 0.03 - 5.89  |
| Dermatological           | 3.96 | 2.42 - 6.11 | 0.91   | 0.34 - 1.98 | 3.96   | 1.08 - 10.09 |
| Genitourinary            | 2.04 | 1.02 - 3.65 | 1.28   | 0.59 - 2.43 | 0.93   | 0.02 - 5.16  |
| Eye/Adnexa               | 1.38 | 0.56 - 2.84 | 1.21   | 0.52 - 2.39 | 0.98   | 0.03 - 5.48  |
| Infectious and parasitic | 1.13 | 0.37 - 2.64 | 0.69   | 0.19 - 1.79 | -      | -            |

|                         |       |               |       |               |       |             |
|-------------------------|-------|---------------|-------|---------------|-------|-------------|
| Ear/Mastoid             | 0.19  | 0.004 – 1.03  | 0.57  | 0.16 – 1.46   | 10.93 | 0.02 – 5.16 |
| Neurological            | 0.37  | 0.05 – 1.34   | 0.14  | 0.003 – 0.79  | 0.93  | 0.02 – 5.16 |
| Mental/behavioral       | 0.56  | 0.12 – 1.62   | 0.14  | 0.003 – 0.79  | -     | -           |
| Total                   | 35.63 | 30.56 – 41.26 | 16.83 | 13.78 – 20.33 | 26.04 | 16.92-38.20 |
| <b>Injury</b>           |       |               |       |               |       |             |
| Wrist and Hand          | 2.89  | 1.62 - 4.77   | 0.89  | 0.33-1.94     | 2.89  | 0.59-8.45   |
| Knee/lower leg          | 1.96  | 0.94 - 3.61   | 1.06  | 0.43 – 2.18   | 0     | 0           |
| Head/Eye                | 1.36  | 0.49 - 2.96   | 0.35  | 0.04-1.26     | 1.13  | 0.03 – 6.30 |
| Lower back/lumbar spine | 0.93  | 0.25-2.37     | 0.54  | 0.11 – 1.56   | 1.16  | 0.03 – 6.44 |
| Thorax/neck             | 0.56  | 0.11 – 1.63   | 0.57  | 0.16 – 1.46   | 0     | 0           |
| Skin burn               | 0.19  | 0.004 – 1.03  | 0.57  | 0.16 – 1.46   | 0.93  | 0.02 – 5.16 |
| Upper arm/shoulder      | 0.25  | 0.006 – 1.38  | 0.38  | 0.05 – 1.37   | -     | -           |
| Elbow/forearm           | 0.56  | 0.11-1.63     | -     | -             | 0.93  | 0.02 – 5.16 |
| Total                   | 8.69  | 6.29-11.69    | 4.35  | 2.89-6.29     | 7.07  | 2.85-14.53  |

IRR was determined to assess the differences in the disease and injury rates between deck, engine, and galley workers. Deck workers had significantly higher rates of cardiovascular, dermatological, respiratory, and musculoskeletal disorders when compared to engine workers. Also, deck workers had 3.25 times higher rates of wrist and hand injuries than engine workers (Table 4).

**Table 4. Differences in rates of seafarer diseases and injuries between worksite groups over the four years study period (n = 379)**

| Medical events   | Deck vs. Engine |             | Deck vs. Galley |             | Engine vs. Galley |             |
|------------------|-----------------|-------------|-----------------|-------------|-------------------|-------------|
|                  | IRR             | 95% CI      | IRR             | 95% CI      | IRR               | 95% CI      |
| <b>Diseases</b>  |                 |             |                 |             |                   |             |
| Gastrointestinal | 1.87            | 1.06 – 3.33 | 1.09            | 0.45 – 3.21 | 0.59              | 0.23 – 1.77 |
| Musculoskeletal  | 2.14            | 1.13 – 4.17 | 1.12            | 0.43 – 3.72 | 0.52              | 0.19 – 1.81 |
| Cardiovascular   | 3.25            | 1.51 – 7.58 | 1.25            | 0.43 – 4,94 | 0.39              | 0.11 – 1.68 |
| Non-specific     | 1.80            | 0.83 – 3.99 | 3.59            | 0.57 - 149  | 1.99              | 0.30 – 84.9 |
| Respiratory      | 2.60            | 1.11 – 6.57 | 3.59            | 0.56 – 149  | 1.38              | 0.19 – 60.7 |
| Dermatological   | 4.33            | 1.68 – 13   | 1.0             | 0.34 – 4.03 | 0.23              | 0.05 – 1.11 |
| Genitourinary    | 1.59            | 0.59 – 4.34 | 2.2             | 0.31 - 94   | 1.38              | 0.19 – 60.7 |

|                          |      |              |      |              |      |             |
|--------------------------|------|--------------|------|--------------|------|-------------|
| Eye/Adnexa               | 1.14 | 0.35 - 3.59  | 1.40 | 0.18 - 63    | 1.23 | 0.17 - 55   |
| Infectious and parasitic | 1.63 | 0.35 - 8.19  | -    | -            | -    | -           |
| Ear/Mastoid              | 0.32 | 0.006 - 3.28 | 0.2  | 0.002 - 15.6 | 0.61 | 0.06 - 30.3 |
| Neurological             | 2.6  | 0.14 - 153   | 0.4  | 0.02 - 23.5  | 0.15 | 0.001 - 12  |
| Mental/behavioral        | 3.9  | 0.31 - 204   | -    | -            | -    | -           |
| Total                    | 2.11 | 1.65 - 2.72  | 1.37 | 0.89 - 2.17  | 0.65 | 0.41 - 1.04 |
| <b>Injury</b>            |      |              |      |              |      |             |
| Wrist and Hand           | 3.25 | 1.19 - 10.23 | 1.00 | 0.28 - 5.39  | 0.31 | 0.06 - 1.90 |
| Knee/lower leg           | 1.86 | 0.64 - 5.75  | -    | -            | -    | -           |
| Head/Eye                 | 3.9  | 0.69 - 39.5  | 1.2  | 0.15 - 55    | 0.31 | 0.02 - 18   |
| Lower back/lumbar spine  | 1.73 | 0.29 - 11.8  | 0.80 | 0.08 - 39.7  | 0.46 | 0.04 - 24   |
| Thorax/neck              | 0.98 | 0.14 - 5.76  | -    | -            | -    | -           |
| Skin burn                | 0.33 | 0.01 - 3.28  | 0.2  | 0.003 - 15.7 | 0.62 | 0.06 - 30.3 |
| Upper arm/shoulder       | 0.65 | 0.01 - 12.5  | -    | -            | -    | -           |
| Total                    | 1.99 | 1.21 - 3.34  | 1.23 | 0.55 - 3.24  | 0.62 | 0.26 - 1.67 |

#### 4. DISCUSSION

This descriptive epidemiological study was mainly designed to quantify the incidence rates of injuries and diseases among seafarers by worksite and rank groups. We have found that across all worksites, the rates of overall diseases were four times higher than the corresponding total injuries rates. A similar finding was reported from a study conducted in the USA<sup>15</sup>, which reported 2 to 3 times total illnesses higher in the worksites than overall injuries. The overall disease rate was 25 per 1,000 seafarer-year during the study period. The most frequent causes of illnesses on board were gastrointestinal, musculoskeletal, and cardiovascular disorders. The majority of gastrointestinal (63%) cases were gastroesophageal reflux (GERD), esophagitis, ulcers, gastritis, hernia, and appendicitis. Lower back disorders (73% of all musculoskeletal disorders) and angina pectoris (39.2% of all CVD diagnoses) were the most frequently reported musculoskeletal and cardiovascular disorders, respectively. This might be related to the lack of fresh food in the diet of seafarers, poor hygiene, and problems in food handling that may increase the risk of digestive system diseases.

Cardiovascular diseases might be related to work related-stress, lifestyle, in particular a diet rich in fat, drinking, smoking, and physical inactivity. A study conducted on the board of Italian flagship (2019) reported that more than 40% and 10% of seafarers were overweight

1  
2  
3 and obese, respectively<sup>22</sup>. This finding suggests that in seafarer's CVD risk factors are higher  
4 compared to ashore workers. On the other hand, cardiovascular diseases and metabolic  
5 disorders are stress-related diseases<sup>23</sup>. Seafarers have high work-related stressors when  
6 compared to ashore workers<sup>20</sup> because their work is characterized by long working hours,  
7 often time-pressure, prolonged isolation from family, and hectic activity. Various studies have  
8 reported that work-related stress has long been considered a contributing factor in the  
9 development of coronary heart disease<sup>24</sup>, musculoskeletal problems<sup>25</sup>, and gastrointestinal  
10 disorders<sup>26</sup>. Similar findings were reported in a Japanese study<sup>27</sup>, which has shown that  
11 gastrointestinal (35.5%), musculoskeletal (19.6%), and cardiovascular diseases (11.6%)  
12 were the diseases more often occurring onboard ships. Our findings are not consistent with  
13 the study conducted in the USA<sup>3</sup>, which reported that dental (26%), respiratory (19%), and  
14 dermatological (14%) disorders were in the order the pathologies occurring most often among  
15 sailing seafarers. Our work has also demonstrated that non-officers had 1.45 times higher  
16 risk for total diseases, and 2.12, 2.25, and 3.66 times significantly higher risk for  
17 gastrointestinal, musculoskeletal, and dermatological disorders, respectively than officers.  
18  
19  
20  
21  
22  
23  
24  
25

26  
27 Deck workers had 2.11 times higher risk for total diseases compared to engine workers. In  
28 particular, deck workers had 4.33, 3.25, 2.60, 2.14, and 1.87 times higher risk for  
29 dermatological, cardiovascular, respiratory, musculoskeletal, and gastrointestinal disorders,  
30 respectively, when compared to engine workers. Cardiovascular pathologies might be due to  
31 work-related stress because deck workers have high work-related stress due to sleep  
32 interruption, high job demands, night shift work, and intense activity than engine workers.  
33 Long working hours are contributing factors to work-related stress, and it is logical to expect  
34 an association between long hours and cardiovascular disorders<sup>28</sup>. The relationship between  
35 stress and coronary heart disease are considered to be linked to multiple and protracted  
36 increases in heart rate and blood pressure resulting from neuroendocrine activation<sup>29,30</sup>. Other  
37 studies have reported that work-related stress can increase the cardiovascular risk of workers  
38  
39  
40  
41  
42  
43  
44  
45  
46  
47  
48  
49  
50  
51  
52  
53  
54  
55  
56  
57  
58  
59  
60

54  
55  
56  
57  
58  
59  
60  
61  
62  
63  
64  
65  
66  
67  
68  
69  
70  
71  
72  
73  
74  
75  
76  
77  
78  
79  
80  
81  
82  
83  
84  
85  
86  
87  
88  
89  
90  
91  
92  
93  
94  
95  
96  
97  
98  
99  
100  
101  
102  
103  
104  
105  
106  
107  
108  
109  
110  
111  
112  
113  
114  
115  
116  
117  
118  
119  
120  
121  
122  
123  
124  
125  
126  
127  
128  
129  
130  
131  
132  
133  
134  
135  
136  
137  
138  
139  
140  
141  
142  
143  
144  
145  
146  
147  
148  
149  
150  
151  
152  
153  
154  
155  
156  
157  
158  
159  
160  
161  
162  
163  
164  
165  
166  
167  
168  
169  
170  
171  
172  
173  
174  
175  
176  
177  
178  
179  
180  
181  
182  
183  
184  
185  
186  
187  
188  
189  
190  
191  
192  
193  
194  
195  
196  
197  
198  
199  
200  
201  
202  
203  
204  
205  
206  
207  
208  
209  
210  
211  
212  
213  
214  
215  
216  
217  
218  
219  
220  
221  
222  
223  
224  
225  
226  
227  
228  
229  
230  
231  
232  
233  
234  
235  
236  
237  
238  
239  
240  
241  
242  
243  
244  
245  
246  
247  
248  
249  
250  
251  
252  
253  
254  
255  
256  
257  
258  
259  
260  
261  
262  
263  
264  
265  
266  
267  
268  
269  
270  
271  
272  
273  
274  
275  
276  
277  
278  
279  
280  
281  
282  
283  
284  
285  
286  
287  
288  
289  
290  
291  
292  
293  
294  
295  
296  
297  
298  
299  
300  
301  
302  
303  
304  
305  
306  
307  
308  
309  
310  
311  
312  
313  
314  
315  
316  
317  
318  
319  
320  
321  
322  
323  
324  
325  
326  
327  
328  
329  
330  
331  
332  
333  
334  
335  
336  
337  
338  
339  
340  
341  
342  
343  
344  
345  
346  
347  
348  
349  
350  
351  
352  
353  
354  
355  
356  
357  
358  
359  
360  
361  
362  
363  
364  
365  
366  
367  
368  
369  
370  
371  
372  
373  
374  
375  
376  
377  
378  
379  
380  
381  
382  
383  
384  
385  
386  
387  
388  
389  
390  
391  
392  
393  
394  
395  
396  
397  
398  
399  
400  
401  
402  
403  
404  
405  
406  
407  
408  
409  
410  
411  
412  
413  
414  
415  
416  
417  
418  
419  
420  
421  
422  
423  
424  
425  
426  
427  
428  
429  
430  
431  
432  
433  
434  
435  
436  
437  
438  
439  
440  
441  
442  
443  
444  
445  
446  
447  
448  
449  
450  
451  
452  
453  
454  
455  
456  
457  
458  
459  
460  
461  
462  
463  
464  
465  
466  
467  
468  
469  
470  
471  
472  
473  
474  
475  
476  
477  
478  
479  
480  
481  
482  
483  
484  
485  
486  
487  
488  
489  
490  
491  
492  
493  
494  
495  
496  
497  
498  
499  
500  
501  
502  
503  
504  
505  
506  
507  
508  
509  
510  
511  
512  
513  
514  
515  
516  
517  
518  
519  
520  
521  
522  
523  
524  
525  
526  
527  
528  
529  
530  
531  
532  
533  
534  
535  
536  
537  
538  
539  
540  
541  
542  
543  
544  
545  
546  
547  
548  
549  
550  
551  
552  
553  
554  
555  
556  
557  
558  
559  
560  
561  
562  
563  
564  
565  
566  
567  
568  
569  
570  
571  
572  
573  
574  
575  
576  
577  
578  
579  
580  
581  
582  
583  
584  
585  
586  
587  
588  
589  
590  
591  
592  
593  
594  
595  
596  
597  
598  
599  
600  
601  
602  
603  
604  
605  
606  
607  
608  
609  
610  
611  
612  
613  
614  
615  
616  
617  
618  
619  
620  
621  
622  
623  
624  
625  
626  
627  
628  
629  
630  
631  
632  
633  
634  
635  
636  
637  
638  
639  
640  
641  
642  
643  
644  
645  
646  
647  
648  
649  
650  
651  
652  
653  
654  
655  
656  
657  
658  
659  
660  
661  
662  
663  
664  
665  
666  
667  
668  
669  
670  
671  
672  
673  
674  
675  
676  
677  
678  
679  
680  
681  
682  
683  
684  
685  
686  
687  
688  
689  
690  
691  
692  
693  
694  
695  
696  
697  
698  
699  
700  
701  
702  
703  
704  
705  
706  
707  
708  
709  
710  
711  
712  
713  
714  
715  
716  
717  
718  
719  
720  
721  
722  
723  
724  
725  
726  
727  
728  
729  
730  
731  
732  
733  
734  
735  
736  
737  
738  
739  
740  
741  
742  
743  
744  
745  
746  
747  
748  
749  
750  
751  
752  
753  
754  
755  
756  
757  
758  
759  
760  
761  
762  
763  
764  
765  
766  
767  
768  
769  
770  
771  
772  
773  
774  
775  
776  
777  
778  
779  
780  
781  
782  
783  
784  
785  
786  
787  
788  
789  
790  
791  
792  
793  
794  
795  
796  
797  
798  
799  
800  
801  
802  
803  
804  
805  
806  
807  
808  
809  
810  
811  
812  
813  
814  
815  
816  
817  
818  
819  
820  
821  
822  
823  
824  
825  
826  
827  
828  
829  
830  
831  
832  
833  
834  
835  
836  
837  
838  
839  
840  
841  
842  
843  
844  
845  
846  
847  
848  
849  
850  
851  
852  
853  
854  
855  
856  
857  
858  
859  
860  
861  
862  
863  
864  
865  
866  
867  
868  
869  
870  
871  
872  
873  
874  
875  
876  
877  
878  
879  
880  
881  
882  
883  
884  
885  
886  
887  
888  
889  
890  
891  
892  
893  
894  
895  
896  
897  
898  
899  
900  
901  
902  
903  
904  
905  
906  
907  
908  
909  
910  
911  
912  
913  
914  
915  
916  
917  
918  
919  
920  
921  
922  
923  
924  
925  
926  
927  
928  
929  
930  
931  
932  
933  
934  
935  
936  
937  
938  
939  
940  
941  
942  
943  
944  
945  
946  
947  
948  
949  
950  
951  
952  
953  
954  
955  
956  
957  
958  
959  
960  
961  
962  
963  
964  
965  
966  
967  
968  
969  
970  
971  
972  
973  
974  
975  
976  
977  
978  
979  
980  
981  
982  
983  
984  
985  
986  
987  
988  
989  
990  
991  
992  
993  
994  
995  
996  
997  
998  
999  
1000

1  
2  
3 experience and of attention in performing the required tasks may be a cause of injuries.  
4 Nearly 30% of injuries occurred in the wrist and hand, followed by knee and lower leg  
5 (21.20%). Our results agree with the study conducted in the Danish-flagged merchant fleet<sup>18</sup>,  
6 which reported that 36% and 18% of upper and lower limb injuries, respectively. Moreover,  
7 this study revealed that non-officers had 1.75 times higher risk for injuries compared to  
8 officers. These findings are agree with previous studies reporting that non-officer have nearly  
9 1.60 times higher risk for injuries compared to officers<sup>17,3,38</sup>. Maritime officers, including the  
10 captain, have high-level responsibilities such as navigation, planning, organization of loading  
11 and unloading operations, and ship controls<sup>19,39</sup>. Non-officers are involved in other tasks  
12 occurring during a voyage such as mooring, cleaning the ship, repairing broken lines and  
13 ropes, operating machinery like cranes and derricks, and also perform steering of the ship at  
14 sea<sup>20,39</sup>. The non-officer work is also physically challenging<sup>19,20,39</sup> and must be carried out  
15 regardless of weather conditions. This could explain why non-officers have a higher risk of  
16 injuries than officers.  
17  
18  
19  
20  
21  
22  
23

24  
25 The present study has shown that the deck workers had higher rates of overall injuries  
26 compared to engine and galley workers. These results are consistent with those of the study  
27 conducted in the USA<sup>15</sup>. Similarly, deck workers had a significantly higher risk for wrist and  
28 hand injuries compared to engine workers. A study conducted in Danish Fleet seafarers<sup>38</sup>  
29 reported that deck workers had a relatively low risk for injuries compared to machine (engine)  
30 workers. Deck workers, particularly deck ratings, perform physical works such as mooring  
31 and unmooring the ship, loading, and unloading cargo<sup>39</sup>.  
32  
33  
34  
35

36  
37 Moreover, deck workers have a shorter sleeping time and sleep interruptions more often than  
38 engine workers because they are engaged in the surveillance system with frequent irregular  
39 operations. These include monitoring the bridge or gangway, acting as lookouts on the bridge,  
40 or carrying out repairs and maintenance work in the deck area<sup>19,20,39</sup>. Hence, night shift work,  
41 long working hours, short average sleep time, and physical stress are important factors  
42 contributing to the high rates of injuries/accidents at sea<sup>10,19,28,40</sup>.  
43  
44  
45

### 46 **Strengths and limitations**

47  
48  
49 Most of the previous studies on pathologies and accidents among seafarers were focused on  
50 the number of cases occurring without a specific epidemiological analysis of the phenomenon.  
51 This study measured the incidence of disease and injury for rank and occupation groups by  
52 estimating the seafarer population of underlying at risk in the rank and workplace categories.  
53 Also, our study demonstrated the incidence rate ratio (IRR) to compare the risk between rank  
54  
55  
56  
57  
58  
59  
60



1  
2  
3 and occupation groups. Limits of this work are in the use of the estimated at-risk seafarer  
4 population in the analysis due to the lack of information on actual at-risk seafarer population.  
5 As a result, the incidence rate may be underestimated or overestimated. Moreover, we have  
6 not measured injury and disease incidence rates by age, gender, work experience, and  
7 nationality due to a lack of these information on the total at-risk seafarer population.  
8  
9  
10

## 11 **CONCLUSION**

12  
13  
14 In general, non-officers and deck workers had a higher risk for diseases and injuries over the  
15 four years of the study period. Non-officers had a significantly higher risk for gastrointestinal,  
16 musculoskeletal, and dermatological disorders and knee and lower leg injuries. Deck officers  
17 had a significantly higher risk for dermatological, cardiovascular, musculoskeletal, respiratory  
18 and gastrointestinal disorders, and wrist and hand injuries. Gastrointestinal, musculoskeletal,  
19 and cardiovascular disorders were the most frequent health problems onboard ships.  
20  
21  
22

23  
24 In terms of prevention, improvement in occupational safety, and the use of protective  
25 equipment and training on work safety procedures could minimize the risk of injuries. A  
26 comprehensive risk assessment, including the identification of hazards, evaluation of the  
27 frequency of different injuries and diseases, and more efforts in specific training programs  
28 will help in reducing the occurrence of occupational injuries onboard ships. The availability of  
29 telemedicine devices<sup>41</sup>, and of systems for quick diagnosis of transmittable diseases in isolated  
30 places such as POCRAMÉ<sup>42</sup> will provide a relevant contribution to health protection of  
31 seafarers. Regular health checks for non-communicable diseases, lifestyle changes such as a  
32 healthy diet and regular exercise could reduce the incidence of CVD. Improved quality of food  
33 provision, catering, proper hygiene, and handling of food may reduce gastrointestinal  
34 disorders. More attention in training and education and following appropriate lifestyle changes  
35 can contribute to improving health onboard ships are the take-home lessons that we can get  
36 from epidemiology. To sum up, the availability of epidemiological data on the occurrence of  
37 diseases and injuries among seafarers could increase the awareness of factors affecting health  
38 on board ships moving in the direction of "prevention is better than cure," one of the main  
39 goals of modern medicine.  
40  
41  
42  
43  
44  
45  
46  
47  
48

## 49 **Contributors**

50  
51 GG.S.: designed study, performed analysis, methodology, interpreted the data and results,  
52 and drafted manuscript. M.D: extracted data and assisted with the preparation of manuscript.  
53 G.B.: contributed to the data collection. MA.S: interpreted the data and involved in the  
54  
55  
56  
57  
58  
59  
60

1  
2  
3 preparation of the manuscript. F.A: guided, edited, reviewed, and approved the study. All  
4 authors approved the final manuscript.  
5  
6  
7

8 **Funding:** This work was supported by the International Transport Workers Federation (ITF)  
9 Trust, London, UK under grant number 558 to C.I.R.M. Institutional funding of the University of  
10 Camerino, Italy, supported Ph.D. bursaries to G.G.S. and G.B.  
11  
12  
13

#### 14 **Conflict of interests**

15  
16 The authors declared that they have no conflict of interest.  
17  
18

#### 19 **Ethical approval**

20  
21 The study has been reviewed and approved by the Scientific/Ethic Committee of the C.I.R.M  
22 Foundation.  
23  
24

25 **Patient consent for publication:** Not required  
26

27 **Data availability statement:** No additional data available  
28

#### 29 **ORCID iD**

30  
31  
32 Getu Gamo Sagaro <https://orcid.org/0000-0002-5983-0266>  
33

34 Gopi Battenini <https://orcid.org/0000-0003-0603-2356>  
35

36  
37 Francesco Amenta <https://orcid.org/0000-0002-0555-1034>  
38  
39

#### 40 **REFERENCES**

- 41  
42  
43 1. BIMCO, ICS. "Manpower Report-The global supply and demand for seafarers. *Exec*  
44 *Summ.* Published online 2015:6. [http://www.ics-shipping.org/docs/default-](http://www.ics-shipping.org/docs/default-source/resources/safety-security-and-operations/manpower-report-2015-executive-summary.pdf?sfvrsn=16)  
45 [source/resources/safety-security-and-operations/manpower-report-2015-executive-](http://www.ics-shipping.org/docs/default-source/resources/safety-security-and-operations/manpower-report-2015-executive-summary.pdf?sfvrsn=16)  
46 [summary.pdf?sfvrsn=16](http://www.ics-shipping.org/docs/default-source/resources/safety-security-and-operations/manpower-report-2015-executive-summary.pdf?sfvrsn=16)  
47  
48  
49 2. Telemedicine: revolutionising healthcare for seafarers. Accessed August 10, 2019.  
50 [https://www.ship-technology.com/features/featuretelemedicine-revolutionising-](https://www.ship-technology.com/features/featuretelemedicine-revolutionising-healthcare-for-seafarers-5673476/)  
51 [healthcare-for-seafarers-5673476/](https://www.ship-technology.com/features/featuretelemedicine-revolutionising-healthcare-for-seafarers-5673476/)  
52  
53  
54 3. Lefkowitz RY, Redlich CA, Mph MDS. Injury , illness , and disability risk in American  
55  
56  
57  
58  
59

- 1  
2  
3 seafarers. *Am J Ind Med*. 2018;61:120-129. doi:10.1002/ajim.22802  
4  
5  
6 4. IMO (International Maritime Organization). Accessed October 12, 2019.  
7 <https://business.un.org/en/entities/13>  
8  
9  
10 5. Center for Maritime Safety and Health Studies. Published online 2019. Accessed  
11 October 12, 2019. [https://www.cdc.gov/niosh/programs/cmshs/port\\_operations.html](https://www.cdc.gov/niosh/programs/cmshs/port_operations.html)  
12  
13 6. Mulić, Rosanda, Pero Vidan and RB. Comparative analysis of medical assistance to  
14 seafarers in the world and the republic of Croatia. *15th Int Conf Transp Sci*. Published  
15 online 2012:1-8. [https://bib.irb.hr/datoteka/587264.Mulic\\_Vidan\\_Bosnjak.pdf](https://bib.irb.hr/datoteka/587264.Mulic_Vidan_Bosnjak.pdf)  
16  
17  
18 7. Roberts SE, Nielsen D, Kotłowski A, Jaremin B. Fatal accidents and injuries among  
19 merchant seafarers worldwide. *Occup Med (Chic Ill)*. 2014;64:259-266.  
20 doi:10.1093/occmed/kqu017  
21  
22  
23 8. Hansen HL. Surveillance of deaths on board Danish merchant ships, 1986-93:  
24 Implications for prevention. *Occup Environ Med*. 1996;53:269-275.  
25 doi:10.1136/oem.53.4.269  
26  
27  
28 9. Roberts SE, Hansen HL. An analysis of the causes of mortality among seafarers in the  
29 British merchant fleet (1986-1995) and recommendations for their reduction. *Occup*  
30 *Med (Chic Ill)*. 2002;52:195-202. doi:10.1093/occmed/52.4.195  
31  
32  
33 10. Berg HP. Human Factors and Safety Culture in Maritime Safety ( revised ). *Mar Navig*  
34 *Saf Sea Transp STCW, Marit Educ Train (MET), Hum Resour Crew Manning, Marit*  
35 *Policy, Logist Econ Matters*. 2013;7(3):107-115. doi:10.12716/1001.07.03.04  
36  
37  
38 11. Carter T. Mapping the knowledge base for maritime health: 1 historical perspective.  
39 *Int Marit Health*. 2011;62(4):210-216.  
40  
41  
42 12. Carter T. Mapping the knowledge base for maritime health: 2. a framework for  
43 analysis. *Int Marit Health*. 2011;62(4):217-223. Accessed October 12, 2019.  
44 <http://www.ncbi.nlm.nih.gov/pubmed/22544496>  
45  
46  
47 13. Carter T. Mapping the knowledge base for maritime health: 3 illness and injury in  
48 seafarers. *Int Marit Health*. 2011;62(4):224-240.  
49  
50  
51 14. Carter T. Mapping the knowledge base for maritime health: 4 safety and performance  
52 at sea. *Int Marit Health*. 2011;62(4):236-244. Accessed October 12, 2019.  
53  
54  
55  
56  
57  
58  
59  
60

- 1  
2  
3 <http://www.ncbi.nlm.nih.gov/pubmed/22544498>  
4  
5  
6 15. Lefkowitz RY, Slade MD, Redlich CA. "Injury, illness, and work restriction in merchant  
7 seafarers." *Am J Ind Med*. 2015;58(6):688-696. doi:10.1002/ajim.22459  
8  
9  
10 16. Hannerz H. Hospitalisations among seafarers on merchant ships. *Occup Env Med*.  
11 2005;62:145-150. doi:10.1136/oem.2004.014779  
12  
13 17. Kaerlev L, Jensen A, Nielsen PS, Olsen J, Hannerz H, Tüchsen F. Hospital contacts for  
14 injuries and musculoskeletal diseases among seamen and fishermen : A population-  
15 based cohort study. *BioMed Cent*. 2008;9:1-9. doi:10.1186/1471-2474-9-8  
16  
17  
18 18. Herttua K, Gerdøe S, Vork JC, Nielsen JB. Age and nationality in relation to injuries  
19 at sea among officers and non- - officers : a study based on contacts from ships to  
20 Telemedical Assistance Service in Denmark. *BMJ Open*. 2019;9:1-7.  
21 doi:10.1136/bmjopen-2019-034502  
22  
23  
24 19. Oldenburg M, Jensen HJ. Stress and strain among seafarers related to the  
25 occupational groups. *Int J Environ Res Public Health*. 2019;16(7).  
26 doi:10.3390/ijerph16071153  
27  
28  
29 20. Oldenburg M, Jensen HJ, Latza U, Baur X. Seafaring stressors aboard merchant and  
30 passenger ships. *Int J Public Health*. 2009;54(2):96-105. doi:10.1007/s00038-009-  
31 7067-z  
32  
33  
34 21. Mahdi SS, Amenta F. Eighty years of CIRM. A journey of commitment and dedication  
35 in providing maritime medical assistance. *Int Marit Health*. 2016;67(4):187-195.  
36 doi:10.5603/imh.2016.0036  
37  
38  
39 22. Nittari G, Tomassoni D, Di Canio M, et al. Overweight among seafarers working on  
40 board merchant ships. *BMC Public Health*. 2019;19(1):1-8. doi:10.1186/s12889-018-  
41 6377-6  
42  
43  
44 23. Siegrist J, Rodel A. Work stress and health risk behavior. *Scand J Work Env Heal*.  
45 2006;32(6):473-481. doi:10.5271/sjweh.1052  
46  
47  
48 24. Cooper CARYL, Marshall JUDI. Occupational sources of stress: a review of the  
49 literature relating to coronary heart disease and mental ill health. *J Occup Psychol*.  
50 1976;49(1):11-28.  
51  
52  
53  
54  
55  
56  
57  
58  
59  
60

- 1  
2  
3 25. Leino P. Symptoms of stress predict musculoskeletal disorders. *J Epidemiol*  
4 *Community Health*. 1989;43(3):293-300. doi:10.1136/jech.43.3.293  
5  
6  
7 26. House JS, McMichael AJ, Wells JA, Kaplan BH LL. Occupational stress and health  
8 among factory workers. *J Heal Soc Behav*. 1979;20(2):139-160.  
9  
10  
11 27. Ehara M, Muramatsu S, Sano Y, Takeda S, Hisamune S. The tendency of diseases  
12 among seamen during the last fifteen years in Japan. *Ind Health*. 2006;44(1):155-  
13 160. doi:10.2486/indhealth.44.155  
14  
15  
16 28. Spurgeon A, Harrington JM, Cooper CL. Health and safety problems associated with  
17 long working hours: A review of the current position. *Occup Environ Med*.  
18 1997;54(6):367-375. doi:10.1136/oem.54.6.367  
19  
20  
21 29. Steptoe, Andrew, George Fieldman and OE. "An experimental study of the effects of  
22 control over work pace on cardiovascular responsivity." *J Psychophysiol*. 1993;7:290-  
23 300.  
24  
25  
26  
27 30. Carroll, Douglas, Michael G. Harris and GC. "Haemodynamic adjustments to mental  
28 stress in normotensives and subjects with mildly elevated blood pressure."  
29 *Psychophysiology*. 1991;28:438-446.  
30  
31  
32 31. Kivimäki M, Virtanen M, Elovainio M, Kouvonen A, Väänänen A, Vahtera J. Work  
33 stress in the etiology of coronary heart disease - A meta-analysis. *Scand J Work*  
34 *Environ Heal*. 2006;32(6):431-442. doi:10.5271/sjweh.1049  
35  
36  
37  
38 32. Jaremin B KE. Myocardial infarction (MI) at the work-site among Polish seafarers. The  
39 risk and the impact of occupational factors. *Int Marit Heal*. 2003;54(1-4):26-39.  
40  
41  
42 33. Filikowski J, Rzepiak M, Renke W, Winnicka A SD. Selected risk factors of ischemic  
43 heart disease in Polish seafarers. Preliminary report. *Int Marit Heal*. 2003;54(1-4):40-  
44 46.  
45  
46  
47 34. Caruso G. "Do seafarers have sunshine." 8th International Symposium on Maritime  
48 Health (ISMH) Book of abstracts. Published online 2005.  
49  
50  
51 35. Laraqui O, Manar N, Laraqui S, et al. Prevalence of skin diseases amongst Moroccan  
52 fishermen. *Int Marit Health*. 2018;69(1):22-27. doi:10.5603/IMH.2018.0004  
53  
54  
55 36. Meyer G, Siekmann H, Feister U, Felten C HJ. Measurement of sunlight exposure in  
56  
57  
58  
59

- 1  
2  
3 seafaring [Ermittlung der natürlichen UV-Strahlenexposition in der Seeschiffahrt]. 50.  
4 Jahrestagung der Deutschen Gesellschaft für Arbeitsmedizin und Umweltmedizin  
5 (DGAUM). *Eur J Dermatol*. Published online 2010:434-436.  
6  
7  
8  
9 37. Oldenburg M, Kuechmeister B, Ohnemus U, Baur X, Moll I. Extrinsic skin ageing  
10 symptoms in seafarers subject to high work-related exposure to UV radiation. *Eur J*  
11 *Dermatology*. 2013;23(5):663-670. doi:10.1684/ejd.2013.2142  
12  
13  
14 38. Jensen OC, Sørensen JF, Canals ML, Hu YP, Nikolic N TM. Incidence of self-reported  
15 occupational injuries in seafaring — an international study. *Occup Med*.  
16 2004;54(8):548-555. doi:10.1093/occmed/kqh090  
17  
18  
19 39. STCW. International Convention on Standards of Training, Certification and  
20 Watchkeeping for Seafarers. IMO. Published 1995. Accessed May 2, 2020.  
21 [http://www.imo.org/en/OurWork/humanelement/trainingcertification/pages/stcw-](http://www.imo.org/en/OurWork/humanelement/trainingcertification/pages/stcw-convention.aspx)  
22 [convention.aspx](http://www.imo.org/en/OurWork/humanelement/trainingcertification/pages/stcw-convention.aspx)  
23  
24  
25  
26 40. Harrington JM. Health effects of shift work and extended hours of work. *Occup*  
27 *Environ Med*. 2001;58(1):68-72.  
28  
29  
30 41. Sagaro GG, Amenta F. Past, present, and future perspectives of telemedical  
31 assistance at sea: a systematic review. *Int Marit Health*. 2020;71(2):97-104.  
32 doi:10.5603/IMH.2020.0018  
33  
34  
35 42. POCRAMÉ - Rapid diagnosis of infections in isolated settings. Accessed September 8,  
36 2020. <http://pocrame.com/>  
37  
38  
39  
40  
41  
42  
43  
44  
45  
46  
47  
48  
49  
50  
51  
52  
53  
54  
55  
56  
57  
58  
59  
60

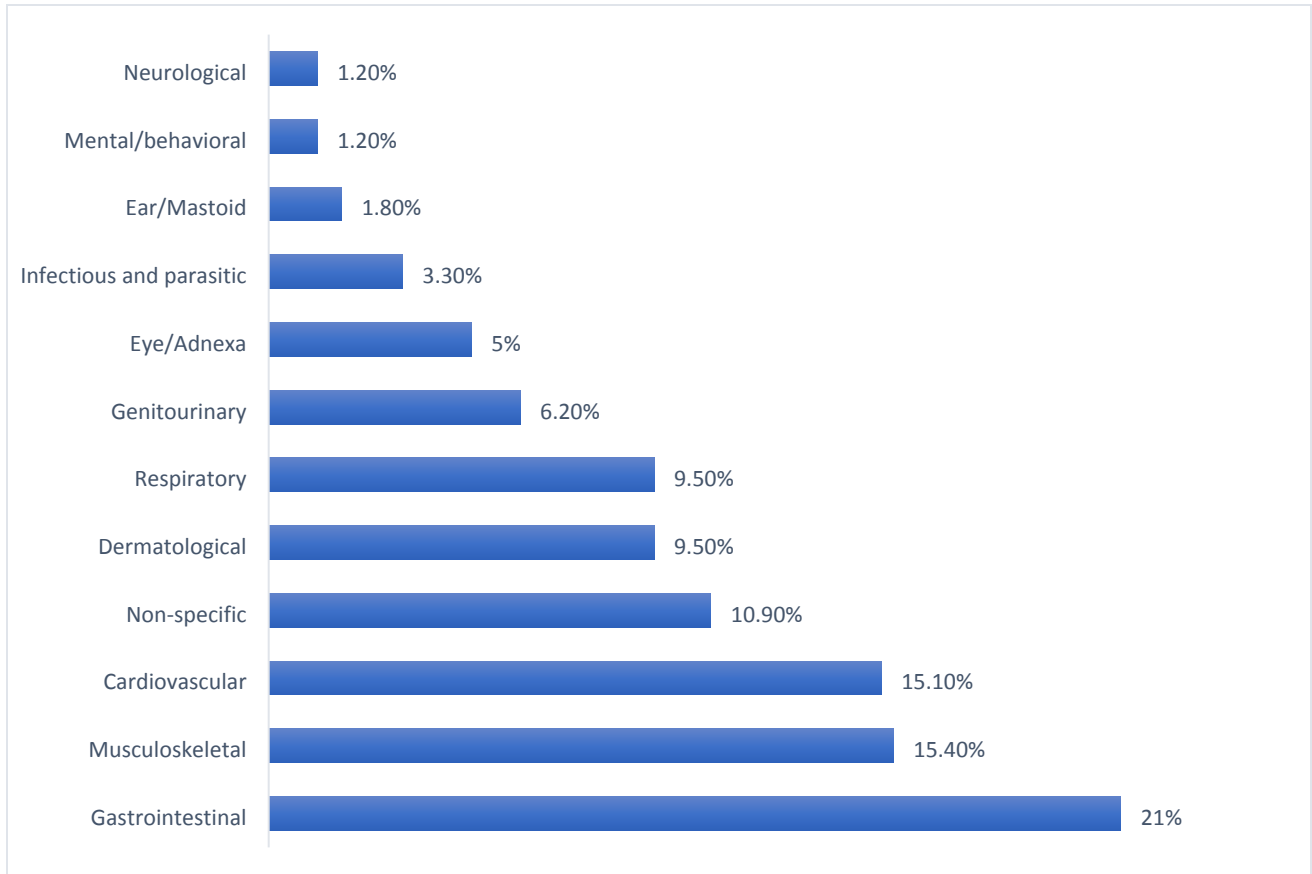

Figure 1. Diagnosis of seafarers according to WHO ICD 10<sup>th</sup> category from 2016 to 2019 (n = 338)

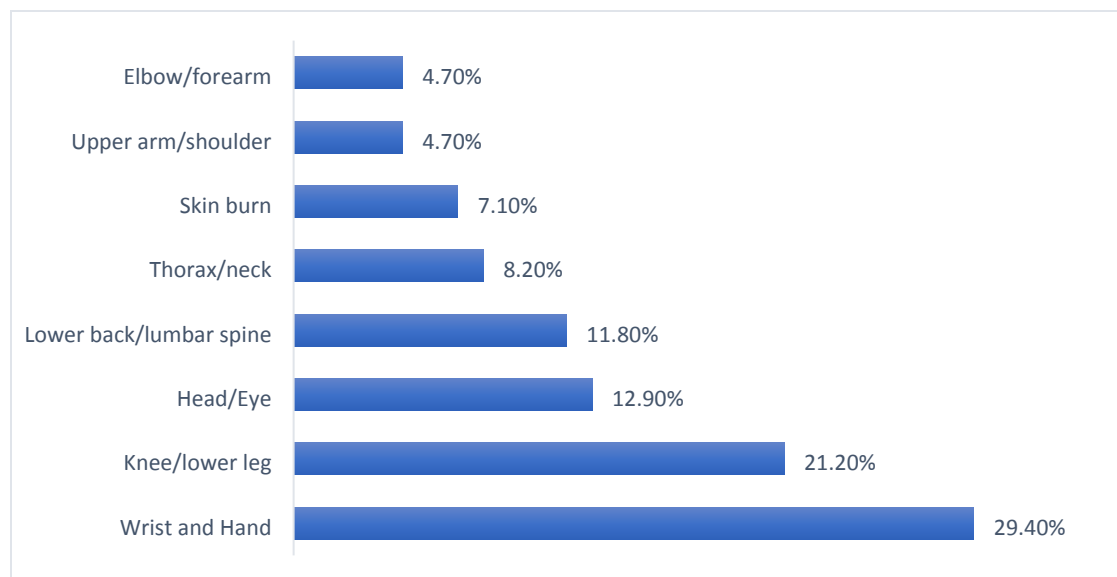

Figure 2: Distribution of injured body parts of seafarers with injuries from 2016 to 2019 (n = 85)



# BMJ Open

## Incidence of occupational injuries and diseases among seafarers

|                                 |                                                                                                                                                                                                                                                                                                                                                                                                                                                                                                                                                                                                                   |
|---------------------------------|-------------------------------------------------------------------------------------------------------------------------------------------------------------------------------------------------------------------------------------------------------------------------------------------------------------------------------------------------------------------------------------------------------------------------------------------------------------------------------------------------------------------------------------------------------------------------------------------------------------------|
| Journal:                        | <i>BMJ Open</i>                                                                                                                                                                                                                                                                                                                                                                                                                                                                                                                                                                                                   |
| Manuscript ID                   | bmjopen-2020-044633.R1                                                                                                                                                                                                                                                                                                                                                                                                                                                                                                                                                                                            |
| Article Type:                   | Original research                                                                                                                                                                                                                                                                                                                                                                                                                                                                                                                                                                                                 |
| Date Submitted by the Author:   | 01-Dec-2020                                                                                                                                                                                                                                                                                                                                                                                                                                                                                                                                                                                                       |
| Complete List of Authors:       | Sagaro, Getu Gamo; University of Camerino, Telemedicine and Telepharmacy Center, School of Medicinal and Health Products Sciences; University of Camerino<br>Dicanio, Marzio; Research Department, International Radio Medical Centre (CIRM),<br>Battineni, Gopi ; University of Camerino, Telemedicine and Telepharmacy Center, School of Medicinal and Health Products Sciences<br>Samad, Marc; CMA-CGM, Tour CMA CGM, 4 Quai d'Arenc, 13002 Marseille<br>Amenta, Francesco; Università degli Studi di Camerino Scuola di Scienze del Farmaco e dei Prodotti della Salute, Telemedicine and Telepharmacy Centre |
| <b>Primary Subject Heading</b>: | Epidemiology                                                                                                                                                                                                                                                                                                                                                                                                                                                                                                                                                                                                      |
| Secondary Subject Heading:      | Epidemiology, Health informatics, Cardiovascular medicine, Occupational and environmental medicine                                                                                                                                                                                                                                                                                                                                                                                                                                                                                                                |
| Keywords:                       | Epidemiology < TROPICAL MEDICINE, EPIDEMIOLOGY, Epidemiology < INFECTIOUS DISEASES, OCCUPATIONAL & INDUSTRIAL MEDICINE                                                                                                                                                                                                                                                                                                                                                                                                                                                                                            |
|                                 |                                                                                                                                                                                                                                                                                                                                                                                                                                                                                                                                                                                                                   |

SCHOLARONE™  
Manuscripts

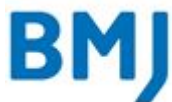

I, the Submitting Author has the right to grant and does grant on behalf of all authors of the Work (as defined in the below author licence), an exclusive licence and/or a non-exclusive licence for contributions from authors who are: i) UK Crown employees; ii) where BMJ has agreed a CC-BY licence shall apply, and/or iii) in accordance with the terms applicable for US Federal Government officers or employees acting as part of their official duties; on a worldwide, perpetual, irrevocable, royalty-free basis to BMJ Publishing Group Ltd ("BMJ") its licensees and where the relevant Journal is co-owned by BMJ to the co-owners of the Journal, to publish the Work in this journal and any other BMJ products and to exploit all rights, as set out in our [licence](#).

The Submitting Author accepts and understands that any supply made under these terms is made by BMJ to the Submitting Author unless you are acting as an employee on behalf of your employer or a postgraduate student of an affiliated institution which is paying any applicable article publishing charge ("APC") for Open Access articles. Where the Submitting Author wishes to make the Work available on an Open Access basis (and intends to pay the relevant APC), the terms of reuse of such Open Access shall be governed by a Creative Commons licence – details of these licences and which [Creative Commons](#) licence will apply to this Work are set out in our licence referred to above.

Other than as permitted in any relevant BMJ Author's Self Archiving Policies, I confirm this Work has not been accepted for publication elsewhere, is not being considered for publication elsewhere and does not duplicate material already published. I confirm all authors consent to publication of this Work and authorise the granting of this licence.

## **Incidence of occupational injuries and diseases among seafarers**

*Getu Gamo Sagaro<sup>1\*</sup>, Marzio Dicario<sup>2</sup>, Gopi Battineni<sup>1</sup>, Marc Abdul Samad<sup>3</sup> and Francesco Amenta<sup>1,2</sup>*

<sup>1</sup>Telemedicine and Telepharmacy Center, School of Medicinal and Health Products Sciences, University of Camerino, 62032 Camerino, Italy

<sup>2</sup>Research Department, Internazionale Radio Medical Center (C.I.R.M), 00144 Rome, Italy

<sup>3</sup>CMA-CGM, Tour CMA CGM, 4 Quai d'Arenc, 13002 Marseille, France

### **Corresponding Author:**

Getu Gamo Sagaro (Ph.D.)  
Telemedicine and Telepharmacy Center  
School of Medicinal and Health Products Sciences,  
University of Camerino  
62032 Camerino MC, Italy  
E-mail: [getugamo.sagaro@unicam.it](mailto:getugamo.sagaro@unicam.it)

## Abstract

**Objectives:** Workers at sea have high mortality, injuries, and illnesses, and work in a hazardous environment compared to ashore workers. The present study was designed to measure the incidence of diseases and occupational injuries among seafarers and quantify the contribution of differences in rank and job onboard on seafarers' illnesses and injuries rates.

**Methods:** A retrospective study was employed. This study's data were based on contacts (n = 423) for medical requests from CMA CGM container ships to the International Radio Medical Center (C.I.R.M.) in Rome from 2016 to 2019, supplemented by data on the estimated total at-risk seafarer population on container ships (n = 13,475) over the study period. The outcome measures were the distribution of Injuries by anatomic location and types of diseases across seafarers' ranks and worksites. We determined the incidence rate and incidence rate ratio (IRR) with a 95% confidence interval (CI).

**Results:** The total disease rate was 25 per 1,000 seafarer-years, and the overall injury rate was 6.31 per 1,000 seafarer-years over the four years study period. Non-officers were more likely than officers to have gastrointestinal [IRR: 2.12 (95% CI) = 1.13 - 4.26], dermatological [IRR: 3.66 (95% CI) = 1.27 - 14.42] and musculoskeletal [IRR: 2.25 (95% CI) = 1.11-5.05] disorders onboard container ships. Deck workers were more likely than engine workers to be injured in the wrist and hand (IRR: 3.25 (95% CI) = 1.19 - 10.23).

**Conclusions:** Rates of reported injury and disease were significantly higher among non-officers than officers; thus, this study suggests the need for rank-specific preventative measures. Future studies should consider risk factors for injury and illness among seafarers in order to propose further preventive measures.

**Keywords:** Epidemiology, Injury, Disease, Seafarer, Rank, Occupation

### Strengths and limitations of this study

- ✚ The first study to measure the contribution of differences in rank and job to the rates of injury and disease of seafarer's onboard container ships.
- ✚ This study measured the incidence rates and Incidence rate ratios of injury and disease by rank and worksite of seafarers based on contacts from onboard container ships to TMAS.
- ✚ The estimated at-risk seafarer population was used in the analysis due to the lack of information on the actual at-risk seafarer population.

## 1. INTRODUCTION

In 2015, more than 1.6 million seafarers served worldwide, of which 774,000 and 873,500 were officers and ratings, respectively<sup>1</sup>. It is estimated that nearly 65,000 deep-sea merchant ships operate worldwide, carrying more than 1.6 million sailing seafarers<sup>1,2</sup>.

In general, work onboard ships are broadly grouped by working areas, including the deck, engine, and galley<sup>3</sup>. Shipping is one of the most widespread transportation systems, and more than 88% of the world's trade utilizes it<sup>4,5</sup>. Workers at sea have high mortality, injuries, and illnesses rate compared to ashore workers<sup>5</sup>. Sailing seafarers have a one in eleven chance of being injured on duty on board<sup>6</sup>, and sometimes physical injuries can be acute and a primary cause of disability. Different studies have reported higher mortality and morbidity rates onboard merchant ships when compared to the land occupation. For instance, a study conducted on the British merchant fleet reported that between 2003 to 2012, the fatal accident rate in shipping was 21 times higher than that in the general British workforce, 4.7 times higher than that in the construction industry, and 13 times higher than in manufacturing<sup>7</sup>. Fatal occupational accidents in Danish seafarers onboard ships were 11.5 times higher than Danish male workers ashore<sup>8</sup>. Moreover, seafarers working on board of British merchant ships had 23.9 times higher risk of mortality due to accidents at work than all workers in Great Britain<sup>9</sup>. The risk of death is 25 times higher for maritime transport than for air transport, according to the death accounts for every 100 km<sup>10</sup>.

Identifying the potential area of incidents and assessing the probability of the occurrence of occupational medical events may assure the availability of treatment and the development of prevention strategies to reduce the rate of diseases and/or injuries among seafarers and to improve health outcomes<sup>11-13</sup>. Unfortunately, due to the scarcity of evidence-based information on the incidence of occupational diseases and injuries onboard ships, preventive measures in the maritime environment received less attention than other working activities<sup>14</sup>. On the other hand, determinants of onboard merchant ship illnesses, injuries, disability, and fatalities, remain not adequately studied due to the not easy access of seafarer's medical data<sup>3,13,15</sup>. Previous studies have reported that non-officers have a higher risk for diseases and injuries compared to officers<sup>3,15-18</sup>, but most of these studies considered only occupational groups.

The exposure to the work-related risk of officers and non-officers working in different ship areas such as deck, engine, and galley is not similar because they attend different duties in different working hours<sup>19</sup>. For instance, workers in the engine room are exposed to work-

1  
2  
3 related risks such as noise, vibration, and heat or pollutants during their working hours<sup>19,20</sup>.  
4 In contrast, people working in the deck, as well as in the galley, are potentially exposed to  
5 different work-related risks<sup>19</sup>. Because of the different areas of activity and associated  
6 burdens, the likelihood of illnesses and the occurrence of injuries can differ. Hence, the study  
7 on the incidence rates of injury and disease by rank and worksite of seafarers would provide  
8 information for prevention strategies such as resource allocation, prioritizing training areas,  
9 improving the medicine chests on board, and access to telemedicine consultation to reduce  
10 injury and disease at the workplace.  
11  
12  
13  
14  
15

16 The present study aimed to analyze the incidence rates of reported occupational diseases and  
17 injuries among seafarers by worksite and rank groups. This work provides factual information  
18 on the rate of illnesses and injuries between the worksite group as well as the rank. The  
19 results obtained can be used to prioritize occupational health risks and guide the development  
20 of preventative measures onboard container ships.  
21  
22  
23

## 24 **2. METHODS**

### 25 **2.1. Study design, data source, and collection procedure**

26  
27  
28  
29  
30 We employed a retrospective study design and received data from the Centro Internazionale  
31 Radio Medico (International Radio Medical Centre, C.I.R.M.) database. C.I.R.M. is the Italian  
32 Telemedical Maritime Assistance Service (TMAS) and represents one of the oldest and best  
33 known TMAS worldwide. C.I.R.M. operates since 1935 and has assisted more than 100,000  
34 seafarers onboard ships<sup>21</sup>. CMA CGM S.A. is a French container transport and shipping  
35 company. It is a leading shipping group globally, using 200 shipping routes between 420 ports  
36 in 150 different countries. In this particular study, the data source we used was reported  
37 diseases and injuries from onboard CMA CGM container ships to TMAS, in Rome. CMA CGM  
38 S.A. shipping company made a contractual agreement with C.I.R.M. in January 2016 to  
39 identify new approaches to provide high-quality telemedical assistance for seafarers. In view  
40 of this agreement, data provided for medical assistance on the company's board ships are  
41 more detailed and, therefore, can be used for a basic epidemiological analysis.  
42  
43  
44  
45  
46  
47  
48

49 Work-related diseases are illnesses predominantly due to physical, chemical, and biological  
50 factors associated with merchant seafaring occupations, and they are recorded in the C.I.R.M.  
51 database according to the World Health Organization (WHO) International Classification of  
52 Disease 10<sup>th</sup> revised version (ICD 10). An occupational injury is defined as a sudden,  
53 unexpected, and unwanted forceful event due to an external cause's onboard ships. In the  
54  
55  
56  
57

1  
2  
3 C.I.R.M. database, injuries also are recorded according to the WHO ICD 10<sup>th</sup> revised version  
4 (chapter XIX, S00-S99, and T00-T98).  
5  
6

7 The classification of both illnesses and occupational injuries was made according to the prompt  
8 diagnosis and recorded medical datasets in the C.I.R.M. database. The attributes included in  
9 the database were age, gender, rank, working site, type of vessel, means of contacts, days,  
10 months, and years of diagnosis. Disease and injury diagnosis affected body parts, and ICD  
11 10 for both diseases and injuries were included in the dataset. For the analysis of the incidence  
12 of illnesses and injuries, the rank and worksite groups were the parameters considered.  
13  
14  
15

16  
17 An estimated total number of at-risk seafarer population was calculated by multiplying the  
18 number of vessels during the study period by the average number of crew members per  
19 vessel. As a result, large ships, including general cargo, tankers, and bulk carriers, have an  
20 average size of 20 crew members per ship<sup>3</sup>. The CMA CGM shipping company handles only  
21 container ships, with an average of 25 crew members per ship. Regarding rank distribution  
22 per ship, nine officers and sixteen non-officers serve onboard. In respect of worksite, ten deck  
23 workers, thirteen engine workers and two galleys (catering) workers are in service per vessel.  
24 The average number of the crew size, their rank as well as worksite distribution per large  
25 vessel based on the knowledge of industry norm were calculated.  
26  
27  
28  
29  
30

31 The number of CMA CGM container ships contracted over four years, from January 2016 to  
32 December 31, 2019, was 539. An estimated number of the total at-risk seafarer population  
33 for worksite and rank was determined by multiplying the total number of vessels over four  
34 years by occupation and rank distribution per ship. The total number of seafarers at risk was  
35 adjusted proportionally to the number of seafarers in the dataset for whom information on  
36 occupation and rank was available. Then, worksite and rank specific incidence rates were  
37 calculated by dividing the number of cases by the total at-risk seafarer population for each  
38 worksite and rank over four years. Incidence rate ratio (IRR) and 95% confidence interval  
39 (CI) were calculated to compare the injuries and diseases rates by seafarer's rank and  
40 worksite. The outcome of rates was expressed as per 1,000 seafarer-years. Seafarer-year is  
41 defined as the number of crew members per ship multiplied by the number of vessels each  
42 year. Descriptive analysis of seafarer's demographic variables, including age, rank, and  
43 worksite, was done to evaluate the distribution of reported occupational injuries and diseases.  
44 Rank was stratified by officers (deck and engine officers) and non-officers (deck and engine  
45 ratings, and galley). The worksite was also categorized into three groups, including the deck,  
46 engine, and galley. The Chi-square or Fisher's exact test was used to determine distributional  
47  
48  
49  
50  
51  
52  
53  
54  
55  
56  
57  
58  
59  
60



differences in rank and worksite groups. A two-tailed  $P < 0.05$  was considered statistically significant. The STATA software version 15 was used for data analysis.

## 2.2. Patient and public involvement

Patients and public were not involved in the study

## 3. RESULTS

Overall, 423 patients were assisted by the C.I.R.M. aboard container ships during the four-year study period. Of these, 338 (80%) and 85 (20%) were diseases and injuries, respectively. However, 11% (37) of the total number of patients with the disease and 8% (7) of the injured patients were unknown as to rank and worksite. The mean age (SD) of seafarers with illnesses and injuries was  $40.37 + 12.52$  years and  $38.39 + 12.88$  years, respectively. The total disease rate was 25 per 1000 seafarer-years. Injury and disease incidence rates for non-officer and officer were significantly differed, as shown in Table 1. In column 5 of Table 1, we reported only the incidence rate ratios that were statistically significant ( $p < 0.05$ ). As a result, non-officers were more likely than officers to be injured (IRR = 1.75) and to have the disease (IRR = 1.45). Deck workers are almost 2 times more likely than engine workers to be injured ( $p < 0.001$ ) (Table 1).

**Table 1. Number of cases, seafarer-years, incidence rates, and incidence rate ratios of injury and disease by rank and worksite of seafarers from 2016 to 2019.**

| Variable        | Injury (n = 78) | Seafarer-years | Injury incidence rate (per 1000 seafarer-years)  | Injury Rate ratio (95% CI)  |
|-----------------|-----------------|----------------|--------------------------------------------------|-----------------------------|
| Total           | 78              | 12,365         | 6.31                                             | N/A                         |
| <b>Rank</b>     |                 |                |                                                  |                             |
| Officer         | 19              | 4,451          | 4.27                                             | 1                           |
| Non-officer     | 59              | 7,914          | 7.45                                             | <b>1.75 (1.75 – 3.10)*</b>  |
| <b>Worksite</b> |                 |                |                                                  |                             |
| Deck            | 43              | 4,946          | 8.69                                             | <b>1.99 (1.21 – 3.34)**</b> |
| Engine          | 28              | 6,430          | 4.35                                             | 1                           |
| Galley          | 7               | 989            | 7.07                                             |                             |
|                 | Disease(n=301)  | Seafarer-years | Disease incidence rate (per 1000 seafarer-years) | Disease Rate ratio (95% CI) |
| Total           | 301             | 12,000         | 25                                               | N/A                         |
| <b>Rank</b>     |                 |                |                                                  |                             |
| Officer         | 84              | 4320           | 19.44                                            | 1                           |
| Non-officer     | 217             | 7680           | 28.25                                            | <b>1.45 (1.12 – 1.89)**</b> |
| <b>Worksite</b> |                 |                |                                                  |                             |
| Deck            | 171             | 4,800          | 35.63                                            | <b>2.12 (1.69 – 2.80)**</b> |
| Engine          | 105             | 6,240          | 16.83                                            | 1                           |
| Galley          | 25              | 960            | 26                                               |                             |

Significant at \* $p < 0.01$ , \*\* $P < 0.001$ , Abbreviation: N/A , not applicable

The most frequent causes of illnesses onboard ships were gastrointestinal disorders (n = 71, 21%) followed by musculoskeletal (n = 52, 15.40%) and cardiovascular diseases (n = 51, 15.10%) (Figure 1). In general, out of the 85 injuries, 29.40% were wrist and hand injuries, 21.20% were knee/lower leg injuries, 12.90% were head/eye injuries, 11.80% were lower back/lumbar spine injuries, 8.2% were thorax/neck injuries (Figure 2).

### Rank-specific incidence rates of occupational injuries and diseases

Gastrointestinal diseases were the most common disorders for officers (IR = 3.1 per 1000 seafarer-years) and non-officers (IR = 6.51 per 1000 seafarer-years), as presented in Table 2. The most common injuries for non-officer was wrist/hand (1.93 per 1000 seafarer-years) and knee/lower leg (1.84 per 1000 seafarer-years). The incidence rate ratio (IRR) for non-officers' versus officers was determined and reported in Table 2. As a result, non-officers were more likely than officers to have gastrointestinal (IRR = 2.12), musculoskeletal (IRR = 2.25), and dermatological (IRR = 3.66) disorders. Concerning injuries, non-officers were more likely than officers to be injured in the knee or lower leg (IRR = 4.21) (Table 2).

**Table 2. Incidence Rate of diseases and occupational injuries by the seafarer rank from 2016 to 2019 (n = 379)**

| Medical events            | Officer |              | Non-officer |             | IRR <sup>a</sup> | 95% CI      |
|---------------------------|---------|--------------|-------------|-------------|------------------|-------------|
|                           | Rate    | 95% CI       | Rate        | 95% CI      |                  |             |
| <b>Disease types</b>      |         |              |             |             |                  |             |
| Gastrointestinal          | 3.1     | 1.64 - 5.24  | 6.51        | 4.82 - 8.59 | 2.12             | 1.13-4.26*  |
| Musculoskeletal           | 2.14    | 1.03 - 3.94  | 4.82        | 3.45 - 6.56 | 2.25             | 1.11-5.05*  |
| Cardiovascular            | 2.69    | 1.29 - 4.95  | 4.39        | 2.95 - 6.31 | 1.63             | 0.77 - 3.75 |
| Non-specific              | 2.86    | 1.47 - 4.99  | 2.68        | 1.64 - 4.14 | 0.94             | 0.44-2.10   |
| Respiratory               | 2.59    | 1.29 - 4.63  | 2.25        | 1.31 - 3.60 | 0.87             | 0.38 - 2.05 |
| Dermatological            | 0.88    | 0.24 - 2.25  | 3.22        | 2.10 - 4.71 | 3.66             | 1.27-14.42* |
| Genitourinary             | 2.06    | 0.99 - 3.78  | 1.27        | 0.64 - 2.28 | 0.62             | 0.24-1.63   |
| Eye/Adnexa                | 1.31    | 0.48 - 2.86  | 1.23        | 0.59 - 2.27 | 0.94             | 0.31-3.14   |
| Infectious and parasitic  | 1.26    | 0.4 - 2.94   | 0.57        | 0.15 - 1.45 | 0.45             | 0.09-2.09   |
| Ear/Mastoid               | 0.41    | 0.05 - 1.49  | 0.46        | 0.13 - 1.19 | 1.13             | 0.16-12.44  |
| Neurological <sup>b</sup> | —       | —            | 0.46        | 0.13 - 1.19 | —                | —           |
| Mental/behavioral         | 0.21    | 0.005 - 1.14 | 0.35        | 0.07 - 1.02 | 1.69             | 0.14-88.59  |
| <b>Injury Location</b>    |         |              |             |             |                  |             |

|                            |      |              |      |             |      |               |
|----------------------------|------|--------------|------|-------------|------|---------------|
| Wrist/Hand                 | 1.72 | 0.74 - 3.38  | 1.93 | 1.11 - 3.14 | 1.13 | 0.45 - 3.03   |
| Knee/lower leg             | 0.44 | 0.05 - 1.57  | 1.84 | 1.03 - 3.03 | 4.20 | 1.01 - 38.01* |
| Head/Eye                   | 0.76 | 0.16 - 2.21  | 0.85 | 0.31 - 1.85 | 1.13 | 0.24-6.95     |
| Lower back/lumbar spine    | 0.77 | 0.16 - 2.25  | 0.73 | 0.24 - 1.69 | 0.94 | 0.18-6.07     |
| Thorax/neck                | 0.21 | 0.005 - 1.14 | 0.69 | 0.25 - 1.51 | 3.37 | 0.41-155      |
| Skin burn                  | 0.21 | 0.005 - 1.14 | 0.58 | 0.19 - 1.35 | 2.81 | 0.31-133      |
| Upper arm/shoulder         | 0.27 | 0.006 - 1.53 | 0.46 | 0.09 - 1.35 | 1.69 | 0.14-88.6     |
| Elbow/forearm <sup>b</sup> | —    | —            | 0.46 | 0.13 - 1.18 | —    | —             |

\*IRR significant at  $p$ -value  $<0.05$

<sup>a</sup>Incidence rate ratio (IRR) and calculated as the rate of non-officer/rate of officer

<sup>b</sup>Dashes indicate the comparison that was not performed.

### Worksite-specific incidence rates of occupational injuries and diseases

Table 3 summarizes the rates of illnesses and injuries per seafarer worksite groups. Consequently, gastrointestinal (IR = 7.01), cardiovascular (IR = 6.06) and musculoskeletal (IR = 5.40) diseases were the most common disorders for deck workers. Musculoskeletal disorders (IR = 2.52) were the second most common diseases for engine workers. Wrist/hand injuries (IR = 2.89) were the most common injury for both deck and galley workers, while knee/lower leg injuries (IR = 1.06) were for engine workers (Table 3).

**Table 3. Incidence rates of occupational injury and disease by seafarer's worksite from 2016 to 2019 (n= 379)**

| Medical events       | Deck |             | Engine |             | Galley |              |
|----------------------|------|-------------|--------|-------------|--------|--------------|
|                      | Rate | 95% CI      | Rate   | 95% CI      | Rate   | 95% CI       |
| <b>Disease types</b> |      |             |        |             |        |              |
| Gastrointestinal     | 7.01 | 4.83 - 9.83 | 3.76   | 2.38 - 5.63 | 6.37   | 2.34-13.83   |
| Musculoskeletal      | 5.40 | 3.59 - 7.79 | 2.52   | 1.47 - 4.04 | 4.82   | 1.56-11.22   |
| Cardiovascular       | 6.06 | 3.93 - 8.94 | 1.86   | 0.89 - 3.43 | 4.85   | 1.32-12.38   |
| Non-specific         | 3.86 | 2.29 - 6.09 | 2.15   | 1.14-3.66   | 1.07   | 0.03 - 5.96  |
| Respiratory          | 3.82 | 2.26 - 6.02 | 1.46   | 0.67 - 2.78 | 1.06   | 0.03 - 5.89  |
| Dermatological       | 3.96 | 2.42 - 6.11 | 0.91   | 0.34 - 1.98 | 3.96   | 1.08 - 10.09 |
| Genitourinary        | 2.04 | 1.02 - 3.65 | 1.28   | 0.59 - 2.43 | 0.93   | 0.02 - 5.16  |
| Eye/Adnexa           | 1.38 | 0.56 - 2.84 | 1.21   | 0.52 - 2.39 | 0.98   | 0.03 - 5.48  |

|                                       |      |              |      |              |       |             |
|---------------------------------------|------|--------------|------|--------------|-------|-------------|
| Infectious and parasitic <sup>b</sup> | 1.13 | 0.37 – 2.64  | 0.69 | 0.19 – 1.79  | —     | —           |
| Ear/Mastoid                           | 0.19 | 0.004 – 1.03 | 0.57 | 0.16 – 1.46  | 10.93 | 0.02 – 5.16 |
| Neurological                          | 0.37 | 0.05 – 1.34  | 0.14 | 0.003 – 0.79 | 0.93  | 0.02 – 5.16 |
| Mental/behavioral <sup>b</sup>        | 0.56 | 0.12 – 1.62  | 0.14 | 0.003 – 0.79 | —     | —           |
| <b>Injury Location</b>                |      |              |      |              |       |             |
| Wrist/Hand                            | 2.89 | 1.62 - 4.77  | 0.89 | 0.33-1.94    | 2.89  | 0.59-8.45   |
| Knee/lower leg <sup>b</sup>           | 1.96 | 0.94 - 3.61  | 1.06 | 0.43 – 2.18  | —     | —           |
| Head/Eye                              | 1.36 | 0.49 - 2.96  | 0.35 | 0.04-1.26    | 1.13  | 0.03 – 6.30 |
| Lower back/lumbar spine               | 0.93 | 0.25-2.37    | 0.54 | 0.11 – 1.56  | 1.16  | 0.03 – 6.44 |
| Thorax/neck <sup>b</sup>              | 0.56 | 0.11 – 1.63  | 0.57 | 0.16 – 1.46  | —     | —           |
| Skin burn                             | 0.19 | 0.004 – 1.03 | 0.57 | 0.16 – 1.46  | 0.93  | 0.02 – 5.16 |
| Upper arm/shoulder <sup>b</sup>       | 0.25 | 0.006 – 1.38 | 0.38 | 0.05 – 1.37  | —     | —           |
| Elbow/forearm <sup>b</sup>            | 0.56 | 0.11-1.63    | —    | —            | 0.93  | 0.02 – 5.16 |

<sup>b</sup>Dashes indicate the comparison that was not performed

The IRRs for deck workers versus engine workers<sup>1</sup>, deck workers versus galley workers<sup>1</sup>, and engine workers versus galley workers were calculated and presented in Table 4. As a result, deck workers were more likely than engine workers to have gastrointestinal (IRR = 1.86), cardiovascular (IRR = 3.26), dermatological (IRR = 4.35), respiratory (IRR = 2.62), and musculoskeletal (IRR = 2.14) disorders. Also, deck workers were more likely than engine workers to be injured in the wrist and hand (IRR = 3.25)(Table 4).

**Table 4. Incidence rate ratios (IRR) and 95% confidence intervals (95% CI) of occupational injury and disease stratified by seafarers' worksite from 2016 to 2019 (n = 379)**

| Medical events       | Deck vs. Engine |              | Deck vs. Galley |             | Engine vs. Galley |             |
|----------------------|-----------------|--------------|-----------------|-------------|-------------------|-------------|
|                      | IRR             | 95% CI       | IRR             | 95% CI      | IRR               | 95% CI      |
| <b>Disease types</b> |                 |              |                 |             |                   |             |
| Gastrointestinal     | 1.86            | 1.06 – 3.33* | 1.09            | 0.45 – 3.21 | 0.59              | 0.23 – 1.77 |
| Musculoskeletal      | 2.14            | 1.13 – 4.17* | 1.12            | 0.43 – 3.72 | 0.52              | 0.19 – 1.81 |
| Cardiovascular       | 3.26            | 1.51 – 7.58* | 1.25            | 0.43 – 4,94 | 0.39              | 0.11 – 1.68 |
| Non-specific         | 1.80            | 0.83 – 3.99  | 3.59            | 0.57 - 149  | 1.99              | 0.30 – 84.9 |
| Respiratory          | 2.62            | 1.11 – 6.57* | 3.59            | 0.56 – 149  | 1.38              | 0.19 – 60.7 |
| Dermatological       | 4.35            | 1.68 – 13*   | 1.0             | 0.34 – 4.03 | 0.23              | 0.05 – 1.11 |

|                                       |      |               |      |              |      |             |
|---------------------------------------|------|---------------|------|--------------|------|-------------|
| Genitourinary                         | 1.59 | 0.59 – 4.34   | 2.2  | 0.31 - 94    | 1.38 | 0.19 – 60.7 |
| Eye/Adnexa                            | 1.14 | 0.35 – 3.59   | 1.40 | 0.18 - 63    | 1.23 | 0.17 - 55   |
| Infectious and parasitic <sup>b</sup> | 1.63 | 0.35 – 8.19   | —    | —            | —    | —           |
| Ear/Mastoid                           | 0.32 | 0.006 – 3.28  | 0.2  | 0.002 – 15.6 | 0.61 | 0.06 – 30.3 |
| Neurological                          | 2.6  | 0.14 - 153    | 0.4  | 0.02 – 23.5  | 0.15 | 0.001 - 12  |
| Mental/behavioral <sup>b</sup>        | 3.9  | 0.31 - 204    | —    | —            | —    | —           |
| <b>Injury Location</b>                |      |               |      |              |      |             |
| Wrist/Hand                            | 3.25 | 1.19 – 10.23* | 1.00 | 0.28 – 5.39  | 0.31 | 0.06 – 1.90 |
| Knee/lower leg <sup>b</sup>           | 1.86 | 0.64 – 5.75   | —    | —            | —    | —           |
| Head/Eye                              | 3.9  | 0.69 – 39.5   | 1.2  | 0.15 - 55    | 0.31 | 0.02 - 18   |
| Lower back/lumbar spine               | 1.73 | 0.29 – 11.8   | 0.80 | 0.08 – 39.7  | 0.46 | 0.04 - 24   |
| Thorax/neck <sup>b</sup>              | 0.98 | 0.14 – 5.76   | —    | —            | —    | —           |
| Skin burn                             | 0.33 | 0.01 – 3.28   | 0.2  | 0.003 – 15.7 | 0.62 | 0.06 – 30.3 |
| Upper arm/shoulder <sup>b</sup>       | 0.65 | 0.01 – 12.5   | —    | —            | —    | —           |

\*IRR significant at  $p$ -value  $<0.05$

<sup>b</sup>Dashes indicate the comparison that was not performed.

#### 4. DISCUSSION

This descriptive epidemiological study was mainly designed to quantify the incidence rates of reported injuries and diseases among seafarers by worksite and rank groups. The injury and illness rates measured were based on the contacts from onboard container ships to the Telemedical Maritime Assistance Service (TMAS) in Rome. Any contact for medical requests from ships to the C.I.R.M. with injuries or cases of illness with important patient data, including age, sex, job, rank, the nationality of the patient, ship flag, ship name, date of medical event that occurred, anatomic location of the injury, diagnosis, treatment provided, the patient follow-up schedule and other relevant information are registered in the database. Hence, we got access to injuries and diseases with seafarers' rank and job from the datasets. We have found that the rates of overall reported diseases were four times higher than the corresponding total reported injuries rates across all worksites. A similar finding was reported from a study conducted in the USA<sup>15</sup>, which reported 2 to 3 times total illnesses higher in the worksites than overall injuries. The overall reported disease rate was 25 per 1,000 seafarer-year during the study period. The disease rate for non-officers and officers were significantly differed [IRR: 1.45 (95% CI) = 1.12 – 1.89]. This study reported that the most common causes

1  
2  
3 of illnesses on board were gastrointestinal (21%), musculoskeletal (15.40%), and  
4 cardiovascular disorders (15.10%). Similar findings were reported in a Japanese study<sup>22</sup>,  
5 which has shown that gastrointestinal (35.5%), musculoskeletal (19.6%), and cardiovascular  
6 diseases (11.6%) were the diseases more often occurring onboard ships. Our findings are not  
7 consistent with the study conducted in the USA<sup>3</sup>, which reported that dental (26%),  
8 respiratory (19%), and dermatological (14%) disorders were in the order the pathologies  
9 occurring most often among sailing seafarers.  
10  
11  
12  
13

14 The majority of gastrointestinal (63%) cases were gastroesophageal reflux (GERD),  
15 esophagitis, ulcers, gastritis, hernia, and appendicitis. This might be related to the lack of  
16 fresh food in seafarers' diet and problems in food handling that may increase the risk of  
17 digestive system diseases. Lower back disorders (73% of all musculoskeletal disorders ) and  
18 angina pectoris (39.2% of all CVD diagnoses) were the most frequently reported  
19 musculoskeletal and cardiovascular disorders, respectively. As for cardiovascular disorders, it  
20 could be related to work-related stress, lifestyle, especially a high-fat diet, drinking, smoking  
21 and physical inactivity. A study conducted on the board of Italian flagship (2019) reported  
22 that more than 40% and 10% of seafarers were overweight and obese, respectively<sup>23</sup>. This  
23 finding suggests that in seafarer's CVD risk factors are higher compared to ashore workers.  
24 On the other hand, cardiovascular diseases and metabolic disorders are stress-related  
25 diseases<sup>24</sup>.  
26  
27  
28  
29  
30  
31  
32

33 Our work has also demonstrated that non-officers were more likely than officers to have  
34 gastrointestinal (IRR = 2.12), musculoskeletal (IRR = 2.25), and dermatological (IRR = 3.66)  
35 disorders. This might be due to work-related stress because maritime officers, including the  
36 captain, have high-level responsibilities such as navigation, planning, organization of loading  
37 and unloading operations, and ship controls<sup>19,25</sup>. Non-officers are involved in other tasks  
38 occurring during a voyage and their work is physically more demanding and stressful than  
39 officers. In general, seafarers have high work-related stressors when compared to ashore  
40 workers<sup>20</sup> because their work is characterized<sup>20</sup> by long working hours, often time-pressure,  
41 prolonged isolation from family, and hectic activity. Various studies have reported that work-  
42 related stress has long been considered a contributing factor in the development of  
43 musculoskeletal problems<sup>26</sup> and gastrointestinal disorders<sup>27</sup>.  
44  
45  
46  
47  
48  
49  
50

51 Gastrointestinal (IR = 7.01), cardiovascular (IR = 6.06) and musculoskeletal (IR = 5.40)  
52 diseases were the most common disorders for deck workers. Similarly, deck workers were  
53 more likely than engine workers to have gastrointestinal (IRR = 1.86), cardiovascular (IRR  
54 = 3.26), dermatological (IRR = 4.35), respiratory (IRR = 2.62), and musculoskeletal (IRR =  
55  
56  
57  
58  
59  
60

1  
2  
3 2.14) disorders. Cardiovascular pathologies might be due to work-related stress because  
4 deck workers have high work-related stress due to sleep interruption, high job demands,  
5 night shift work, and intense activity than engine workers. A study reported that work related  
6 stress was a risk factor for cardiovascular diseases<sup>28</sup>. Long working hours are contributing  
7 factors to work-related stress, and it is logical to expect an association between long hours  
8 and cardiovascular disorders<sup>29,30</sup>. Studies have also shown that night shift work had adverse  
9 effects on health and risk factors for the development of chronic diseases such as  
10 cardiovascular diseases<sup>19,31,32</sup>. The relationship between stress and coronary heart disease  
11 are considered to be linked to multiple and protracted increases in heart rate and blood  
12 pressure resulting from neuroendocrine activation<sup>33-36</sup>. Other studies have reported that  
13 work-related stress can increase the cardiovascular risk of workers<sup>37-39</sup>. As for dermatological  
14 disorders, it might result in skin exposure to risk factors in the workplace. Seafaring is a risky  
15 activity characterized by exposure to different skin risk factors such as seawater, humidity,  
16 solar radiation, and others<sup>40,41</sup>. Deck crews are frequently engaged in maintenance, repair,  
17 loading, painting activities, and exposure to chemicals, UV radiation, and other skin risk  
18 factors<sup>42,43</sup>.

19  
20  
21  
22  
23  
24  
25  
26  
27  
28 The total reported injury rate was 6.31 per 1,000 seafarer-year over four years' study period.  
29 The injury rate for non-officers and officers were significantly differed [IRR: 1.75 (95% CI) =  
30 1.75 – 3.10]. Nearly 30% of injuries occurred in the wrist and hand, followed by the knee and  
31 lower leg (21.20%). Our results agree with the study conducted in the Danish-flagged  
32 merchant fleet<sup>18</sup>, which reported 36% and 18% of upper and lower limb injuries, respectively.  
33 Moreover, this study revealed that non-officers were more likely than officers to be injured  
34 (IRR = 1.75). This finding was in agreement with the previous studies<sup>17,3,44</sup>. Non-officer work  
35 is characterized by mooring, cleaning the ship, repairing broken cables and ropes, operating  
36 machinery such as cranes and drilling towers, and steering the ship at sea<sup>20,25</sup>. The non-officer  
37 work is also physically challenging<sup>19,20,25</sup> and must be carried out regardless of weather  
38 conditions. This could explain why non-officers have a higher rate of injuries than officers.

39  
40  
41  
42  
43  
44  
45  
46 The present study has shown that the deck workers had higher rates of overall reported  
47 injuries (IR = 8.69) compared to the engine (IR = 4.35) and galley (IR = 7.07) workers.  
48 These results are consistent with those of the study conducted in the USA<sup>15</sup>. We found that  
49 the injury rate for deck workers and engine workers were significantly differed [IRR: 1.99  
50 (95% CI) =1.21 – 3.34]. Similarly, deck workers were more likely than engine workers to be  
51 injured in the wrist and hand (IRR = 3.25), as shown in Table 4. A study conducted in Danish  
52 Fleet seafarers<sup>44</sup> reported that deck workers had a relatively low risk for injuries than machine  
53  
54  
55  
56  
57

(engine) workers. The difference could be due to methodological differences. The study on seafarers in the Danish fleet was a questionnaire-based survey. Furthermore, denominators, used to determine incidence rates and incidence rate ratios in the Danish fleet, were not consistent with our study. Deck workers, particularly deck ratings, perform physical works such as mooring and unmooring the ship, loading, and unloading cargo<sup>25</sup>. Moreover, deck workers have a shorter sleeping time and sleep interruptions more often than engine workers because they are engaged in the surveillance system with frequent irregular operations. These include monitoring the bridge or gangway, acting as lookouts on the bridge, or carrying out repairs and maintenance work in the deck area<sup>19,20,25</sup>. Hence, night shift work, long working hours, short average sleep time, and physical stress are important factors contributing to the high rates of injuries/accidents at sea<sup>10,19,45,46</sup>.

### **Strengths and limitations**

This study measured the incidence rates of reported injury and disease to TMAS for container ships. Most of the previous studies on pathologies and accidents among seafarers were focused on the number of cases. As far as we know, this study is the first study to measure the contribution of differences in rank and job to the rates of injury and disease of seafarers onboard container ships. Limitations of this study are: 1). We used an estimated average number of seafarers per ship in the analysis, although we took into account different assumptions, including the number of vessels, ships active at sea, number of crew members per ship, and the length of stay of seafarers on board for the accuracy of the estimate. Consequently, the incidence rate may be underestimated or overestimated. 2). Data from patients with injuries and cases of disease contained descriptions such as age and gender, but we had no descriptions of these data on the total at-risk seafarer population. Hence, we have not determined the rates and incidence rate ratios of the diseases and injuries by seafarers' age and sex. 3). Patient data on both injury and diagnosis were compiled according to the revised WHO ICD10 codes and the injury's anatomic location in the database, but not on mechanisms of injury or potential physical hazards related to injured cases. As a result, we have not stratified injuries by mechanisms of injury or occupational hazards to highlight priority areas and recommend preventative measures. 4). We did not have descriptions of data types such as socio-demographic variables and another exposure status of the total seafarer population at risk. In this respect, we have not determined the risk factors for injury and disease to propose further prevention strategies. Furthermore, this study is a retrospective study and limited to the variables available in the dataset. Finally, our study is



1  
2  
3 limited to container ships and does not represent other types of ships at sea. Hence, the  
4 results do not reflect seafarers working on other types of ships.  
5  
6  
7

## 8 9 **CONCLUSION**

10  
11 Non-officers had significantly higher rates of overall reported diseases, specifically  
12 gastrointestinal, musculoskeletal, and dermatological disorders. Also, non-officers were more  
13 likely than officers to be injured in the knee and lower leg. Deck workers had significantly  
14 higher rates for dermatological, cardiovascular, musculoskeletal, respiratory, and  
15 gastrointestinal disorders. Deck workers were more likely than engine workers to be injured  
16 in the wrist and hand. Overall injury and disease rates for non-officers and officers significantly  
17 differed. The same is true between deck workers and engine workers. Hence, this study  
18 suggests the need for rank and work site-specific prevention strategies to reduce injury and  
19 disease rates at the workplace. Future studies should consider the risk factors for injury and  
20 disease among seafarers in order to propose further preventive measures.  
21  
22  
23  
24  
25  
26

## 27 **Contributors**

28  
29 GGS.: conceived and designed the study, performed analysis, methodology, interpreted the  
30 data and results, and drafted the initial manuscript. MD: extracted data and assisted with  
31 the preparation of the manuscript. GB.: contributed to the data collection. MAS: interpreted  
32 the data and involved in the preparation of the manuscript. FA: guided, edited, reviewed, and  
33 approved the study. All authors approved the final version of the manuscript.  
34  
35  
36  
37  
38

39 **Funding:** This work was supported by the International Transport Workers Federation (ITF)  
40 Trust, London, UK, under grant number 558 to C.I.R.M. Institutional funding of the University of  
41 Camerino, Italy, supported Ph.D. bursaries to GGS and GB.  
42  
43  
44

## 45 **Conflict of interests**

46  
47 The authors declared that they have no conflict of interest.  
48  
49  
50  
51  
52  
53  
54  
55  
56  
57  
58  
59  
60

### Ethical approval

The study has been reviewed and approved by the Scientific/Ethics Committee of the C.I.R.M. Foundation.

**Patient consent for publication:** Not required

**Data availability statement:** No additional data available

### ORCID iD

Getu Gamo Sagaro <https://orcid.org/0000-0002-5983-0266>

Gopi Battenini <https://orcid.org/0000-0003-0603-2356>

Francesco Amenta <https://orcid.org/0000-0002-0555-1034>

### REFERENCES

1. BIMCO, ICS. "Manpower Report-The global supply and demand for seafarers. *Exec Summ*. Published online 2015:6. <http://www.ics-shipping.org/docs/default-source/resources/safety-security-and-operations/manpower-report-2015-executive-summary.pdf?sfvrsn=16>
2. Telemedicine: revolutionising healthcare for seafarers. Accessed August 10, 2019. <https://www.ship-technology.com/features/featuretelemedicine-revolutionising-healthcare-for-seafarers-5673476/>
3. Lefkowitz RY, Redlich CA, Mph MDS. Injury , illness , and disability risk in American seafarers. *Am J Ind Med*. 2018;61:120-129. doi:10.1002/ajim.22802
4. IMO (International Maritime Organization). Accessed October 12, 2019. <https://business.un.org/en/entities/13>
5. Center for Maritime Safety and Health Studies. Published online 2019. Accessed October 12, 2019. [https://www.cdc.gov/niosh/programs/cms/shs/port\\_operations.html](https://www.cdc.gov/niosh/programs/cms/shs/port_operations.html)
6. Mulić, Rosanda, Pero Vidan and RB. Comparative analysis of medical assistance to seafarers in the world and the republic of Croatia. *15th Int Conf Transp Sci*. Published online 2012:1-8. [https://bib.irb.hr/datoteka/587264.Mulic\\_Vidan\\_Bosnjak.pdf](https://bib.irb.hr/datoteka/587264.Mulic_Vidan_Bosnjak.pdf)

- 1  
2  
3 7. Roberts SE, Nielsen D, Kotłowski A, Jaremin B. Fatal accidents and injuries among  
4 merchant seafarers worldwide. *Occup Med (Chic Ill)*. 2014;64:259-266.  
5 doi:10.1093/occmed/kqu017  
6  
7
- 8 8. Borch DF, Hansen HL, Burr H, Jepsen JR. Surveillance of maritime deaths on board  
9 Danish merchant ships , 1986 – 2009. Published online 2012:7-16.  
10  
11
- 12 9. Roberts SE, Hansen HL. An analysis of the causes of mortality among seafarers in the  
13 British merchant fleet (1986-1995) and recommendations for their reduction. *Occup  
14 Med (Chic Ill)*. 2002;52:195-202. doi:10.1093/occmed/52.4.195  
15  
16
- 17 10. Berg HP. Human Factors and Safety Culture in Maritime Safety ( revised ). *Mar Navig  
18 Saf Sea Transp STCW, Marit Educ Train (MET), Hum Resour Crew Manning, Marit  
19 Policy, Logist Econ Matters*. 2013;7(3):107-115. doi:10.12716/1001.07.03.04  
20  
21  
22
- 23 11. Carter T. Mapping the knowledge base for maritime health: 1 historical perspective.  
24 *Int Marit Health*. 2011;62(4):210-216.  
25  
26
- 27 12. Carter T. Mapping the knowledge base for maritime health: 2. a framework for  
28 analysis. *Int Marit Health*. 2011;62(4):217-223. Accessed October 12, 2019.  
29 <http://www.ncbi.nlm.nih.gov/pubmed/22544496>  
30  
31
- 32 13. Carter T. Mapping the knowledge base for maritime health: 3 illness and injury in  
33 seafarers. *Int Marit Health*. 2011;62(4):224-240.  
34  
35
- 36 14. Carter T. Mapping the knowledge base for maritime health: 4 safety and performance  
37 at sea. *Int Marit Health*. 2011;62(4):236-244. Accessed October 12, 2019.  
38 <http://www.ncbi.nlm.nih.gov/pubmed/22544498>  
39  
40
- 41 15. Lefkowitz RY, Slade MD, Redlich CA. "Injury, illness, and work restriction in merchant  
42 seafarers." *Am J Ind Med*. 2015;58(6):688-696. doi:10.1002/ajim.22459  
43  
44
- 45 16. Hannerz H. Hospitalisations among seafarers on merchant ships. *Occup Env Med*.  
46 2005;62:145-150. doi:10.1136/oem.2004.014779  
47  
48
- 49 17. Kaerlev L, Jensen A, Nielsen PS, Olsen J, Hannerz H, Tüchsen F. Hospital contacts for  
50 injuries and musculoskeletal diseases among seamen and fishermen : A population-  
51 based cohort study. *BioMed Cent*. 2008;9:1-9. doi:10.1186/1471-2474-9-8  
52  
53
- 54 18. Herttua K, Gerdøe- S, Vork JC, Nielsen JB. Age and nationality in relation to injuries  
55  
56  
57

- 1  
2  
3 at sea among officers and non- - officers : a study based on contacts from ships to  
4 Telemedical Assistance Service in Denmark. *BMJ Open*. 2019;9:1-7.  
5 doi:10.1136/bmjopen-2019-034502  
6  
7  
8  
9 19. Oldenburg M, Jensen HJ. Stress and strain among seafarers related to the  
10 occupational groups. *Int J Environ Res Public Health*. 2019;16(7).  
11 doi:10.3390/ijerph16071153  
12  
13  
14 20. Oldenburg M, Jensen HJ, Latza U, Baur X. Seafaring stressors aboard merchant and  
15 passenger ships. *Int J Public Health*. 2009;54(2):96-105. doi:10.1007/s00038-009-  
16 7067-z  
17  
18  
19 21. Mahdi SS, Amenta F. Eighty years of CIRM. A journey of commitment and dedication  
20 in providing maritime medical assistance. *Int Marit Health*. 2016;67(4):187-195.  
21 doi:10.5603/imh.2016.0036  
22  
23  
24 22. Ehara M, Muramatsu S, Sano Y, Takeda S, Hisamune S. The tendency of diseases  
25 among seamen during the last fifteen years in Japan. *Ind Health*. 2006;44(1):155-  
26 160. doi:10.2486/indhealth.44.155  
27  
28  
29  
30 23. Nittari G, Tomassoni D, Di Canio M, et al. Overweight among seafarers working on  
31 board merchant ships. *BMC Public Health*. 2019;19(1):1-8. doi:10.1186/s12889-018-  
32 6377-6  
33  
34  
35 24. Siegrist J, Rodel A. Work stress and health risk behavior. *Scand J Work Env Heal*.  
36 2006;32(6):473-481. doi:10.5271/sjweh.1052  
37  
38  
39 25. STCW. International Convention on Standards of Training, Certification and  
40 Watchkeeping for Seafarers. IMO. Published 1995. Accessed May 2, 2020.  
41 [http://www.imo.org/en/OurWork/humanelement/trainingcertification/pages/stcw-](http://www.imo.org/en/OurWork/humanelement/trainingcertification/pages/stcw-convention.aspx)  
42 [convention.aspx](http://www.imo.org/en/OurWork/humanelement/trainingcertification/pages/stcw-convention.aspx)  
43  
44  
45  
46 26. Leino P. Symptoms of stress predict musculoskeletal disorders. *J Epidemiol*  
47 *Community Health*. 1989;43(3):293-300. doi:10.1136/jech.43.3.293  
48  
49  
50 27. Lim SK, Yoo SJ, Koo DL, et al. Stress and sleep quality in doctors working on-call  
51 shifts are associated with functional gastrointestinal disorders. *World J Gastroenterol*.  
52 2017;23(18):3330-3337. doi:10.3748/wjg.v23.i18.3330  
53  
54  
55 28. Kivimäki M, Kawachi I. Work Stress as a Risk Factor for Cardiovascular Disease. *Curr*  
56  
57  
58  
59  
60

- 1  
2  
3 *Cardiol Rep.* 2015;17(9). doi:10.1007/s11886-015-0630-8  
4  
5  
6 29. Virtanen M, Heikkilä K, Jokela M, et al. Long working hours and coronary heart  
7 disease: A systematic review and meta-analysis. *Am J Epidemiol.* 2012;176(7):586-  
8 596. doi:10.1093/aje/kws139  
9  
10  
11 30. Shin K, Chung Y, Kwon AY. The Effect of Long Working Hours on Cerebrovascular and  
12 Cardiovascular Disease ; A Case-Crossover Study. 2017;761(December 2016):753-  
13 761. doi:10.1002/ajim.22688.  
14  
15  
16 31. Boivin DB, Boudreau P. Impacts of shift work on sleep and circadian rhythms. *Pathol*  
17 *Biol.* 2014;62(5):292-301. doi:10.1016/j.patbio.2014.08.001  
18  
19  
20 32. Hermansson J, Hallqvist J, Karlsson B, Knutsson A, Gådin KG. Shift work, parental  
21 cardiovascular disease and myocardial infarction in males. *Occup Med (Chic Ill).*  
22 2018;68(2):120-125. doi:10.1093/occmed/kqy008  
23  
24  
25 33. Steptoe A, Kivimäki M. Stress and cardiovascular disease. *Nat Rev Cardiol.*  
26 2012;9(6):360-370. doi:10.1038/nrcardio.2012.45  
27  
28  
29 34. Li J, Zhang M, Loerbroks A, Angerer P, Siegrist J. Work stress and the risk of  
30 recurrent coronary heart disease events: A systematic review and meta-analysis. *Int*  
31 *J Occup Med Environ Health.* 2015;28(1):8-19. doi:10.2478/s13382-014-0303-7  
32  
33  
34  
35 35. Dragano N, Siegrist J, Nyberg ST, et al. Effort-Reward Imbalance at Work and  
36 Incident Coronary Heart Disease: A Multicohort Study of 90,164 Individuals.  
37 *Epidemiology.* 2017;28(4):619-626. doi:10.1097/EDE.0000000000000666  
38  
39  
40 36. Sara JD, Prasad M, Eleid MF, Zhang M, Jay Widmer R, Lerman A. Association between  
41 work-related stress and coronary heart disease: A review of prospective studies  
42 through the job strain, effort-reward balance, and organizational justice models. *J Am*  
43 *Heart Assoc.* 2018;7(9):1-15. doi:10.1161/JAHA.117.008073  
44  
45  
46  
47 37. Kivimäki M, Virtanen M, Elovainio M, Kouvonen A, Väänänen A, Vahtera J. Work  
48 stress in the etiology of coronary heart disease - A meta-analysis. *Scand J Work*  
49 *Environ Heal.* 2006;32(6):431-442. doi:10.5271/sjweh.1049  
50  
51  
52 38. Jaremin B KE. Myocardial infarction (MI) at the work-site among Polish seafarers. The  
53 risk and the impact of occupational factors. *Int Marit Heal.* 2003;54(1-4):26-39.  
54  
55  
56  
57  
58  
59  
60

- 1  
2  
3 39. Filikowski J, Rzepiak M, Renke W, Winnicka A SD. Selected risk factors of ischemic  
4 heart disease in Polish seafarers. Preliminary report. *Int Marit Heal*. 2003;54(1-4):40-  
5 46.  
6  
7  
8 40. Caruso G. "Do seafarers have sunshine." 8th International Symposium on Maritime  
9 Health (ISMH) Book of abstracts. Published online 2005.  
10  
11  
12 41. Laraqui O, Manar N, Laraqui S, et al. Prevalence of skin diseases amongst Moroccan  
13 fishermen. *Int Marit Health*. 2018;69(1):22-27. doi:10.5603/IMH.2018.0004  
14  
15  
16 42. Meyer G, Siekmann H, Feister U, Felten C HJ. Measurement of sunlight exposure in  
17 seafaring [Ermittlung der natürlichen UV-Strahlenexposition in der Seeschiffahrt]. 50.  
18 Jahrestagung der Deutschen Gesellschaft für Arbeitsmedizin und Umweltmedizin  
19 (DGAUM). *Eur J Dermatol*. Published online 2010:434-436.  
20  
21  
22  
23 43. Oldenburg M, Kuechmeister B, Ohnemus U, Baur X, Moll I. Extrinsic skin ageing  
24 symptoms in seafarers subject to high work-related exposure to UV radiation. *Eur J*  
25 *Dermatology*. 2013;23(5):663-670. doi:10.1684/ejd.2013.2142  
26  
27  
28  
29 44. Jensen OC, Sørensen JF, Canals ML, Hu YP, Nikolic N TM. Incidence of self-reported  
30 occupational injuries in seafaring — an international study. *Occup Med*.  
31 2004;54(8):548-555. doi:10.1093/occmed/kqh090  
32  
33  
34 45. Harrington JM. Health effects of shift work and extended hours of work. *Occup*  
35 *Environ Med*. 2001;58(1):68-72.  
36  
37  
38 46. Spurgeon A, Harrington JM, Cooper CL. Health and safety problems associated with  
39 long working hours: A review of the current position. *Occup Environ Med*.  
40 1997;54(6):367-375. doi:10.1136/oem.54.6.367  
41  
42  
43  
44  
45  
46  
47  
48  
49  
50  
51  
52  
53  
54  
55  
56  
57  
58  
59  
60

1  
2  
3 **Legends of the figures**  
4

5 Figure 1. Diagnosis of seafarers according to WHO ICD 10<sup>th</sup> category from 2016 to 2019 (n =  
6 338)  
7

8  
9 Figure 2: Distribution of injured body parts of seafarers with injuries from 2016 to  
10 2019 (n = 85)  
11  
12  
13  
14  
15  
16  
17  
18  
19  
20  
21  
22  
23  
24  
25  
26  
27  
28  
29  
30  
31  
32  
33  
34  
35  
36  
37  
38  
39  
40  
41  
42  
43  
44  
45  
46  
47  
48  
49  
50  
51  
52  
53  
54  
55  
56  
57  
58  
59  
60

For peer review only

1  
2  
3  
4  
5  
6  
7  
8  
9  
10  
11  
12  
13  
14  
15  
16  
17  
18  
19  
20  
21  
22  
23  
24  
25  
26  
27  
28  
29  
30  
31  
32  
33  
34  
35  
36  
37  
38  
39  
40  
41  
42  
43  
44  
45  
46  
47  
48  
49  
50  
51  
52  
53  
54  
55  
56  
57  
58  
59  
60

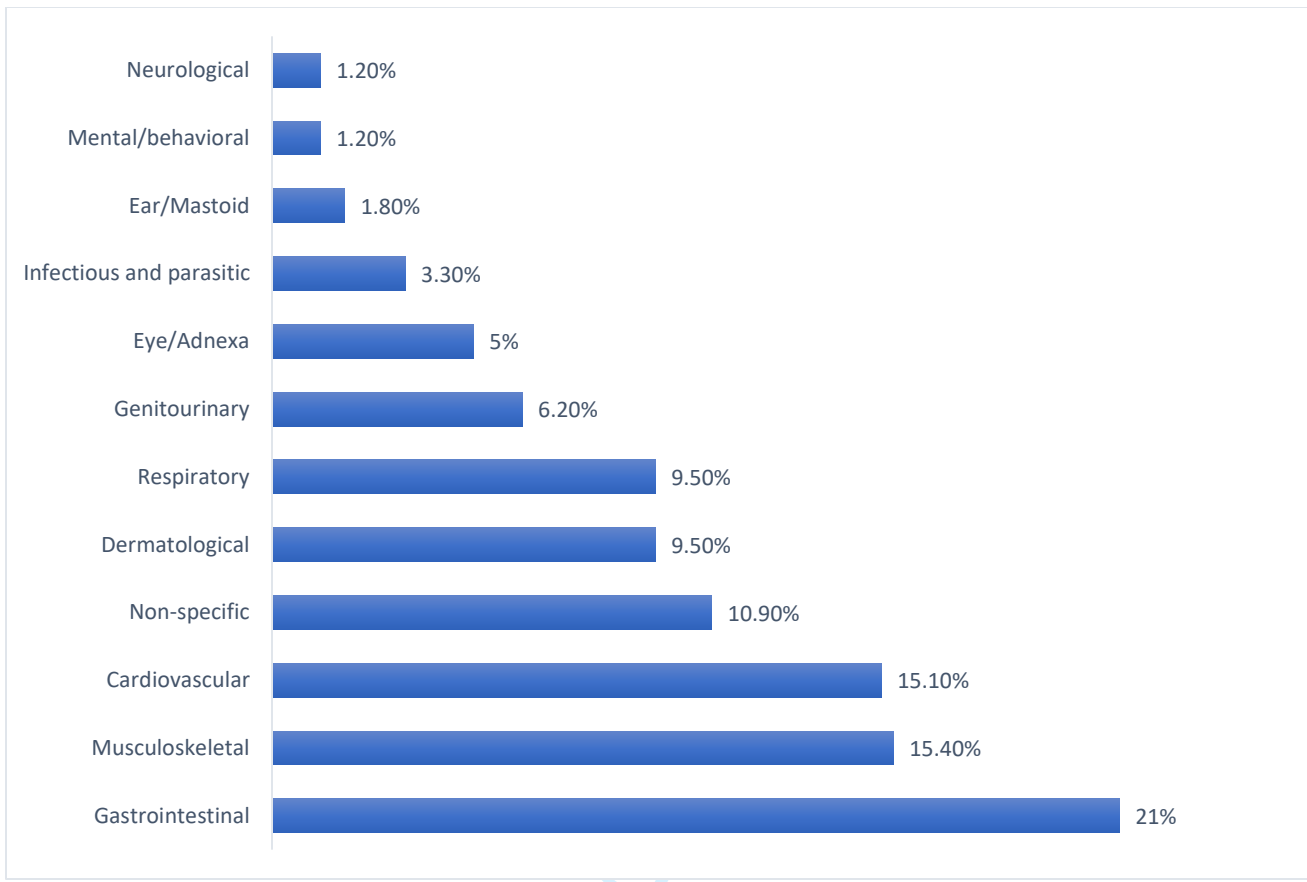

Figure 1

view only



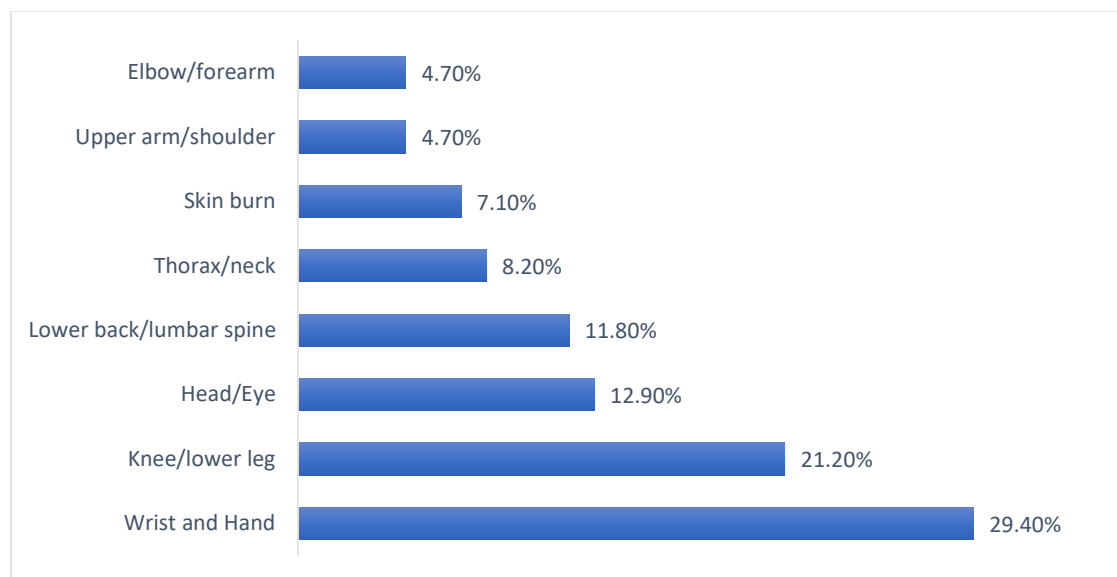

Figure 2

**STROBE 2007 (v4) Statement—Checklist of items that should be included in reports of cohort studies**

| Section/Topic                | Item # | Recommendation                                                                                                                                                                       | Reported on page # |
|------------------------------|--------|--------------------------------------------------------------------------------------------------------------------------------------------------------------------------------------|--------------------|
| <b>Title and abstract</b>    | 1      | (a) Indicate the study’s design with a commonly used term in the title or the abstract                                                                                               | 1                  |
|                              |        | (b) Provide in the abstract an informative and balanced summary of what was done and what was found                                                                                  | 2                  |
| <b>Introduction</b>          |        |                                                                                                                                                                                      |                    |
| Background/rationale         | 2      | Explain the scientific background and rationale for the investigation being reported                                                                                                 | 4                  |
| Objectives                   | 3      | State specific objectives, including any prespecified hypotheses                                                                                                                     | 5                  |
| <b>Methods</b>               |        |                                                                                                                                                                                      |                    |
| Study design                 | 4      | Present key elements of study design early in the paper                                                                                                                              | 5                  |
| Setting                      | 5      | Describe the setting, locations, and relevant dates, including periods of recruitment, exposure, follow-up, and data collection                                                      | 5                  |
| Participants                 | 6      | (a) Give the eligibility criteria, and the sources and methods of selection of participants. Describe methods of follow-up                                                           | 6                  |
|                              |        | (b) For matched studies, give matching criteria and number of exposed and unexposed                                                                                                  |                    |
| Variables                    | 7      | Clearly define all outcomes, exposures, predictors, potential confounders, and effect modifiers. Give diagnostic criteria, if applicable                                             |                    |
| Data sources/<br>measurement | 8*     | For each variable of interest, give sources of data and details of methods of assessment (measurement). Describe comparability of assessment methods if there is more than one group | 6                  |
| Bias                         | 9      | Describe any efforts to address potential sources of bias                                                                                                                            | 6                  |
| Study size                   | 10     | Explain how the study size was arrived at                                                                                                                                            | 6                  |
| Quantitative variables       | 11     | Explain how quantitative variables were handled in the analyses. If applicable, describe which groupings were chosen and why                                                         | 6                  |
| Statistical methods          | 12     | (a) Describe all statistical methods, including those used to control for confounding                                                                                                | 6                  |
|                              |        | (b) Describe any methods used to examine subgroups and interactions                                                                                                                  |                    |
|                              |        | (c) Explain how missing data were addressed                                                                                                                                          | 6                  |
|                              |        | (d) If applicable, explain how loss to follow-up was addressed                                                                                                                       |                    |
|                              |        | (e) Describe any sensitivity analyses                                                                                                                                                |                    |
| <b>Results</b>               |        |                                                                                                                                                                                      |                    |

|                          |     |                                                                                                                                                                                                                                                                                                                                                                                                               |            |
|--------------------------|-----|---------------------------------------------------------------------------------------------------------------------------------------------------------------------------------------------------------------------------------------------------------------------------------------------------------------------------------------------------------------------------------------------------------------|------------|
| Participants             | 13* | (a) Report numbers of individuals at each stage of study—eg numbers potentially eligible, examined for eligibility, confirmed eligible, included in the study, completing follow-up, and analysed<br>(b) Give reasons for non-participation at each stage<br>(c) Consider use of a flow diagram                                                                                                               |            |
| Descriptive data         | 14* | (a) Give characteristics of study participants (eg demographic, clinical, social) and information on exposures and potential confounders<br>(b) Indicate number of participants with missing data for each variable of interest<br>(c) Summarise follow-up time (eg, average and total amount)                                                                                                                | 5&6<br>6   |
| Outcome data             | 15* | Report numbers of outcome events or summary measures over time                                                                                                                                                                                                                                                                                                                                                | 6          |
| Main results             | 16  | (a) Give unadjusted estimates and, if applicable, confounder-adjusted estimates and their precision (eg, 95% confidence interval). Make clear which confounders were adjusted for and why they were included<br>(b) Report category boundaries when continuous variables were categorized<br>(c) If relevant, consider translating estimates of relative risk into absolute risk for a meaningful time period | 7, 8, 9,10 |
| Other analyses           | 17  | Report other analyses done—eg analyses of subgroups and interactions, and sensitivity analyses                                                                                                                                                                                                                                                                                                                |            |
| <b>Discussion</b>        |     |                                                                                                                                                                                                                                                                                                                                                                                                               |            |
| Key results              | 18  | Summarise key results with reference to study objectives                                                                                                                                                                                                                                                                                                                                                      | 11,12,13   |
| <b>Limitations</b>       |     |                                                                                                                                                                                                                                                                                                                                                                                                               |            |
| Interpretation           | 20  | Give a cautious overall interpretation of results considering objectives, limitations, multiplicity of analyses, results from similar studies, and other relevant evidence                                                                                                                                                                                                                                    | 14         |
| Generalisability         | 21  | Discuss the generalisability (external validity) of the study results                                                                                                                                                                                                                                                                                                                                         | 14         |
| <b>Other information</b> |     |                                                                                                                                                                                                                                                                                                                                                                                                               |            |
| Funding                  | 22  | Give the source of funding and the role of the funders for the present study and, if applicable, for the original study on which the present article is based                                                                                                                                                                                                                                                 | 15         |

\*Give information separately for cases and controls in case-control studies and, if applicable, for exposed and unexposed groups in cohort and cross-sectional studies.

**Note:** An Explanation and Elaboration article discusses each checklist item and gives methodological background and published examples of transparent reporting. The STROBE checklist is best used in conjunction with this article (freely available on the Web sites of PLoS Medicine at <http://www.plosmedicine.org/>, Annals of Internal Medicine at <http://www.annals.org/>, and Epidemiology at <http://www.epidem.com/>). Information on the STROBE Initiative is available at [www.strobe-statement.org](http://www.strobe-statement.org).

# BMJ Open

## Incidence of occupational injuries and diseases among seafarers

|                                 |                                                                                                                                                                                                                                                                                                                                                                                                                                                                                                                                                                                                                   |
|---------------------------------|-------------------------------------------------------------------------------------------------------------------------------------------------------------------------------------------------------------------------------------------------------------------------------------------------------------------------------------------------------------------------------------------------------------------------------------------------------------------------------------------------------------------------------------------------------------------------------------------------------------------|
| Journal:                        | <i>BMJ Open</i>                                                                                                                                                                                                                                                                                                                                                                                                                                                                                                                                                                                                   |
| Manuscript ID                   | bmjopen-2020-044633.R2                                                                                                                                                                                                                                                                                                                                                                                                                                                                                                                                                                                            |
| Article Type:                   | Original research                                                                                                                                                                                                                                                                                                                                                                                                                                                                                                                                                                                                 |
| Date Submitted by the Author:   | 25-Jan-2021                                                                                                                                                                                                                                                                                                                                                                                                                                                                                                                                                                                                       |
| Complete List of Authors:       | Sagaro, Getu Gamo; University of Camerino, Telemedicine and Telepharmacy Center, School of Medicinal and Health Products Sciences; University of Camerino<br>Dicanio, Marzio; Research Department, International Radio Medical Centre (CIRM),<br>Battineni, Gopi ; University of Camerino, Telemedicine and Telepharmacy Center, School of Medicinal and Health Products Sciences<br>Samad, Marc; CMA-CGM, Tour CMA CGM, 4 Quai d'Arenc, 13002 Marseille<br>Amenta, Francesco; Università degli Studi di Camerino Scuola di Scienze del Farmaco e dei Prodotti della Salute, Telemedicine and Telepharmacy Centre |
| <b>Primary Subject Heading</b>: | Epidemiology                                                                                                                                                                                                                                                                                                                                                                                                                                                                                                                                                                                                      |
| Secondary Subject Heading:      | Epidemiology, Health informatics, Cardiovascular medicine, Occupational and environmental medicine                                                                                                                                                                                                                                                                                                                                                                                                                                                                                                                |
| Keywords:                       | Epidemiology < TROPICAL MEDICINE, EPIDEMIOLOGY, Epidemiology < INFECTIOUS DISEASES, OCCUPATIONAL & INDUSTRIAL MEDICINE                                                                                                                                                                                                                                                                                                                                                                                                                                                                                            |
|                                 |                                                                                                                                                                                                                                                                                                                                                                                                                                                                                                                                                                                                                   |

SCHOLARONE™  
Manuscripts



I, the Submitting Author has the right to grant and does grant on behalf of all authors of the Work (as defined in the below author licence), an exclusive licence and/or a non-exclusive licence for contributions from authors who are: i) UK Crown employees; ii) where BMJ has agreed a CC-BY licence shall apply, and/or iii) in accordance with the terms applicable for US Federal Government officers or employees acting as part of their official duties; on a worldwide, perpetual, irrevocable, royalty-free basis to BMJ Publishing Group Ltd ("BMJ") its licensees and where the relevant Journal is co-owned by BMJ to the co-owners of the Journal, to publish the Work in this journal and any other BMJ products and to exploit all rights, as set out in our [licence](#).

The Submitting Author accepts and understands that any supply made under these terms is made by BMJ to the Submitting Author unless you are acting as an employee on behalf of your employer or a postgraduate student of an affiliated institution which is paying any applicable article publishing charge ("APC") for Open Access articles. Where the Submitting Author wishes to make the Work available on an Open Access basis (and intends to pay the relevant APC), the terms of reuse of such Open Access shall be governed by a Creative Commons licence – details of these licences and which [Creative Commons](#) licence will apply to this Work are set out in our licence referred to above.

Other than as permitted in any relevant BMJ Author's Self Archiving Policies, I confirm this Work has not been accepted for publication elsewhere, is not being considered for publication elsewhere and does not duplicate material already published. I confirm all authors consent to publication of this Work and authorise the granting of this licence.

## **Incidence of occupational injuries and diseases among seafarers**

*Getu Gamo Sagaro<sup>1\*</sup>, Marzio Dicario<sup>2</sup>, Gopi Battineni<sup>1</sup>, Marc Abdul Samad<sup>3</sup> and Francesco Amenta<sup>1,2</sup>*

<sup>1</sup>Telemedicine and Telepharmacy Center, School of Medicinal and Health Products Sciences, University of Camerino, 62032 Camerino, Italy

<sup>2</sup>Research Department, Internazionale Radio Medical Center (C.I.R.M), 00144 Rome, Italy

<sup>3</sup>CMA-CGM, Tour CMA CGM, 4 Quai d'Arenc, 13002 Marseille, France

### **Corresponding Author:**

Getu Gamo Sagaro (Ph.D.)  
Telemedicine and Telepharmacy Center  
School of Medicinal and Health Products Sciences,  
University of Camerino  
62032 Camerino MC, Italy  
E-mail: [getugamo.sagaro@unicam.it](mailto:getugamo.sagaro@unicam.it)

## Abstract

**Objectives:** Workers at sea have high mortality, injuries, and illnesses, and work in a hazardous environment compared to ashore workers. The present study was designed to measure the incidence of diseases and occupational injuries among seafarers and quantify the contribution of differences in rank and job onboard on seafarers' diseases and injuries rates.

**Methods:** A retrospective study was employed. This study's data were based on contacts (n = 423) for medical requests from CMA CGM container ships to the International Radio Medical Center (C.I.R.M.) in Rome from 2016 to 2019, supplemented by data on the estimated total at-risk seafarer population on container ships (n = 13,475) over the study period. The outcome measures were the distribution of Injuries by anatomic location and types of diseases across seafarers' ranks and worksites. We determined the incidence rate and incidence rate ratio (IRR) with a 95% confidence interval (CI).

**Results:** The total disease rate was 25 per 1,000 seafarer-years, and the overall injury rate was 6.31 per 1,000 seafarer-years over the four years study period. Non-officers were more likely than officers to have reported gastrointestinal [IRR: 2.12 (95% CI) = 1.13 – 4.26], dermatological [IRR: 3.66 (95% CI) = 1.27 – 14.42] and musculoskeletal [IRR: 2.25 (95% CI) = 1.11–5.05] disorders onboard container ships. Deck workers were more likely than engine workers to be injured in the wrist and hand (IRR: 3.25 (95% CI) = 1.19 – 10.23).

**Conclusions:** Rates of reported injury and disease were significantly higher among non-officers than officers; thus, this study suggests the need for rank-specific preventative measures. Future studies should consider risk factors for injury and disease among seafarers in order to propose further preventive measures.

**Keywords:** Epidemiology, Injury, Disease, Seafarer, Rank, Occupation

### Strengths and limitations of this study

- ✚ The first study to measure the contribution of differences in rank and job to the rates of injury and disease of seafarer's onboard container ships.
- ✚ This study measured the incidence rates and Incidence rate ratios of injury and disease by rank and worksite of seafarers based on contacts from onboard container ships to TMAS.
- ✚ The estimated at-risk seafarer population was used in the analysis due to the lack of information on the actual at-risk seafarer population.



## 1. INTRODUCTION

In 2015, more than 1.6 million seafarers served worldwide, of which 774,000 and 873,500 were officers and ratings, respectively<sup>1</sup>. It is estimated that nearly 65,000 deep-sea merchant ships operate worldwide, carrying more than 1.6 million sailing seafarers<sup>1,2</sup>.

In general, work onboard ships are broadly grouped by working areas, including the deck, engine, and galley<sup>3</sup>. Shipping is one of the most widespread transportation systems, and more than 88% of the world's trade utilizes it<sup>4,5</sup>. Workers at sea have high mortality, injuries, and illnesses rate compared to ashore workers<sup>5</sup>. Sailing seafarers have a one in eleven chance of being injured on duty on board<sup>6</sup>, and sometimes physical injuries can be acute and a primary cause of disability. Different studies have reported higher mortality and morbidity rates onboard merchant ships when compared to the land occupation. For instance, a study conducted on the British merchant fleet reported that between 2003 to 2012, the fatal accident rate in shipping was 21 times higher than that in the general British workforce, 4.7 times higher than that in the construction industry, and 13 times higher than in manufacturing<sup>7</sup>. Fatal occupational accidents in Danish seafarers onboard ships were 11.5 times higher than Danish male workers ashore<sup>8</sup>. Moreover, seafarers working on board of British merchant ships had 23.9 times higher risk of mortality due to accidents at work than all workers in Great Britain<sup>9</sup>. The risk of death is 25 times higher for maritime transport than for air transport, according to the death accounts for every 100 km<sup>10</sup>.

Identifying the potential area of incidents and assessing the probability of the occurrence of occupational medical events may assure the availability of treatment and the development of prevention strategies to reduce the rate of diseases and/or injuries among seafarers and to improve health outcomes<sup>11-13</sup>. Unfortunately, due to the scarcity of evidence-based information on the incidence of occupational diseases and injuries onboard ships, preventive measures in the maritime environment received less attention than other working activities<sup>14</sup>. On the other hand, determinants of onboard merchant ship illnesses, injuries, disability, and fatalities, remain not adequately studied due to the not easy access of seafarer's medical data<sup>3,13,15</sup>. Previous studies have reported that non-officers have a higher risk for diseases and injuries compared to officers<sup>3,15-18</sup>, but most of these studies considered only occupational groups.

The exposure to the work-related risk of officers and non-officers working in different ship areas such as deck, engine, and galley is not similar because they attend different duties in different working hours<sup>19</sup>. For instance, workers in the engine room are exposed to work-

1  
2  
3 related risks such as noise, vibration, and heat or pollutants during their working hours<sup>19,20</sup>.  
4 In contrast, people working in the deck, as well as in the galley, are potentially exposed to  
5 different work-related risks<sup>19</sup>. Because of the different areas of activity and associated  
6 burdens, the likelihood of illnesses and the occurrence of injuries can differ. Hence, the study  
7 on the incidence rates of injury and disease by rank and worksite of seafarers would provide  
8 information for prevention strategies such as resource allocation, prioritizing training areas,  
9 improving the medicine chests on board, and access to telemedicine consultation to reduce  
10 injury and disease at the workplace.  
11  
12  
13  
14  
15

16 The present study aimed to analyze the incidence rates of reported occupational diseases and  
17 injuries among seafarers by worksite and rank groups. This work provides factual information  
18 on the rate of diseases and injuries between the worksite group as well as the rank. The  
19 results obtained can be used to prioritize occupational health risks and guide the development  
20 of preventative measures onboard container ships.  
21  
22  
23

## 24 **2. METHODS**

### 25 **2.1. Study design, data source, and collection procedure**

26  
27  
28 We employed a retrospective study design and received data from the Centro Internazionale  
29 Radio Medico (International Radio Medical Centre, C.I.R.M.) database. C.I.R.M. is the Italian  
30 Telemedical Maritime Assistance Service (TMAS) and represents one of the oldest and best  
31 known TMAS worldwide. C.I.R.M. operates since 1935 and has assisted more than 100,000  
32 seafarers onboard ships<sup>21</sup>. CMA CGM S.A. is a French container transport and shipping  
33 company. It is a leading shipping group globally, using 200 shipping routes between 420 ports  
34 in 150 different countries. In this particular study, the data source we used was reported  
35 diseases and injuries from onboard CMA CGM container ships to TMAS, in Rome. CMA CGM  
36 S.A. shipping company made a contractual agreement with C.I.R.M. in January 2016 to  
37 identify new approaches to provide high-quality telemedical assistance for seafarers. In view  
38 of this agreement, data provided for medical assistance on the company's board ships are  
39 more detailed and, therefore, can be used for a basic epidemiological analysis.  
40  
41  
42  
43  
44  
45  
46  
47  
48

49 Work-related diseases are diseases predominantly due to physical, chemical, and biological  
50 factors associated with merchant seafaring occupations, and they are recorded in the C.I.R.M.  
51 database according to the World Health Organization (WHO) International Classification of  
52 Disease 10<sup>th</sup> revised version (ICD 10). An occupational injury is defined as a sudden,  
53 unexpected, and unwanted forceful event due to an external cause's onboard ships. In the  
54  
55  
56  
57  
58  
59  
60

1  
2  
3 C.I.R.M. database, injuries also are recorded according to the WHO ICD 10<sup>th</sup> revised version  
4 (chapter XIX, S00-S99, and T00-T98).  
5  
6

7 The classification of both diseases and occupational injuries was made according to the prompt  
8 diagnosis and recorded medical datasets in the C.I.R.M. database. The injury and disease  
9 rates measured were based on the contacts from onboard container ships to the Telemedical  
10 Maritime Assistance Service (TMAS) in Rome. Any contact for medical requests from ships to  
11 the C.I.R.M. with injuries or cases of illness with important patient data, including age, sex,  
12 job, rank, the nationality of the patient, ship flag, ship name, date of medical event that  
13 occurred, anatomic location of the injury, diagnosis, treatment provided, the patient follow-  
14 up schedule and other relevant information are registered in the database. Hence, we got  
15 access to occupational injuries and diseases with seafarers' rank and job from the TMAS  
16 database for this particular study.  
17  
18  
19  
20  
21  
22

23 An estimated total number of at-risk seafarer population was calculated by multiplying the  
24 number of vessels during the study period by the average number of crew members per  
25 vessel. As a result, large ships, including general cargo, tankers, and bulk carriers, have an  
26 average size of 20 crew members per ship<sup>3</sup>. The CMA CGM shipping company handles only  
27 container ships, with an average of 25 crew members per ship. Regarding rank distribution  
28 per ship, nine officers and sixteen non-officers serve onboard. In respect of worksite, ten deck  
29 workers, thirteen engine workers and two galleys (catering) workers are in service per vessel.  
30 The average number of the crew size, their rank as well as worksite distribution per large  
31 vessel based on the knowledge of industry norm were calculated.  
32  
33  
34  
35  
36  
37

38 The number of CMA CGM container ships contracted over four years, from January 2016 to  
39 December 31, 2019, was 539. An estimated number of the total at-risk seafarer population  
40 for worksite and rank was determined by multiplying the total number of vessels over four  
41 years by occupation and rank distribution per ship. The total number of seafarers at risk was  
42 adjusted proportionally to the number of seafarers in the dataset for whom information on  
43 occupation and rank was available.  
44  
45  
46

## 47 **2.2. Statistical analysis**

48

49 Descriptive statistics such as mean and standard deviation (SD) of age, frequency, and  
50 percentage of injuries by anatomic location and types of diseases were done to evaluate the  
51 distribution of reported occupational injuries and diseases in seafarers with injuries and  
52 diseases. Rank was stratified by officers (deck and engine officers) and non-officers (deck and  
53 engine ratings, and galley). The worksite was also categorized into three groups, including  
54  
55  
56  
57  
58  
59  
60

the deck, engine, and galley. Then, worksite and rank specific incidence rates (IR) were calculated by dividing the number of cases by the total at-risk seafarer population for each worksite and rank over four years. Incidence rate ratio (IRR) and 95% confidence interval (CI) were calculated to compare the injuries and diseases rates by seafarer's rank and worksite. The outcome of rates was expressed as per 1,000 seafarer-years. Seafarer-year is defined as the number of crew members per ship multiplied by the number of vessels each year. The Chi-square or Fisher's exact test was used to determine distributional differences in rank and worksite groups. A two-tailed  $P < 0.05$  was considered statistically significant. The STATA software version 15 was used for data analysis.

### 2.3. Patient and public involvement

Patients and public were not involved in the study

## 3. RESULTS

Overall, 423 patients were assisted by the C.I.R.M. aboard container ships during the four-year study period. Of these, 338 (80%) and 85 (20%) were diseases and injuries, respectively. However, 11% (37) of the total number of patients with the disease and 8% (7) of the injured patients were unknown as to rank and worksite. The mean age (SD) of seafarers with diseases and injuries was 40.37 + 12.52 years and 38.39 + 12.88 years, respectively. Non-officers were more likely than officers to be injured (IRR = 1.75) and to have reported the disease (IRR = 1.45). Deck workers are almost 2 times more likely than engine workers to be injured ( $p < 0.004$ ) (Table 1).

**Table 1. Number of cases, seafarer-years, incidence rates, and incidence rate ratios of injury and disease by rank and worksite of seafarers from 2016 to 2019.**

| Variable        | Injury (n = 78)       | Seafarer-years        | Injury incidence rate (95% CI)         | IRR* (95% CI)             | P-value |
|-----------------|-----------------------|-----------------------|----------------------------------------|---------------------------|---------|
| Total           | 78                    | 12,365                | 6.31 (4.98 – 7.86)                     | N/A                       |         |
| <b>Rank</b>     |                       |                       |                                        |                           |         |
| Officer         | 19                    | 4,451                 | 4.27 (2.57 – 6.66)                     | 1                         |         |
| Non-officer     | 59                    | 7,914                 | 7.45 (5.68 – 9.61)                     | <b>1.75</b> (1.02 – 3.10) | 0.029   |
| <b>Worksite</b> |                       |                       |                                        |                           |         |
| Deck            | 43                    | 4,946                 | 8.69 (6.29 – 11.69)                    | <b>1.99</b> (1.21 – 3.34) | 0.004   |
| Engine          | 28                    | 6,430                 | 4.35 (2.89 – 6.29)                     | 1                         |         |
| Galley          | 7                     | 989                   | 7.07 (2.85 – 14.53)                    |                           |         |
|                 | <b>Disease(n=301)</b> | <b>Seafarer-years</b> | <b>Disease incidence rate (95% CI)</b> | <b>IRR* (95% CI)</b>      |         |
| Total           | 301                   | 12,000                | 25.00 (22.36 – 28.04)                  | N/A                       |         |

|                 |     |       |                       |                           |       |
|-----------------|-----|-------|-----------------------|---------------------------|-------|
| <b>Rank</b>     |     |       |                       |                           |       |
| Officer         | 84  | 4320  | 19.44 (15.54 – 24.02) | 1                         |       |
| Non-officer     | 217 | 7680  | 28.25 (24.66 – 32.21) | <b>1.45</b> (1.12 – 1.89) | 0.003 |
| <b>Worksite</b> |     |       |                       |                           |       |
| Deck            | 171 | 4,800 | 35.63 (30.56 – 41.26) | <b>2.12</b> (1.65 – 2.72) | 0.001 |
| Engine          | 105 | 6,240 | 16.83 (13.78 – 20.33) | 1                         |       |
| Galley          | 25  | 960   | 26.00 (16.92 – 38.20) |                           |       |

Abbreviation: N/A , not applicable, \*IRR only reported the result with a significant comparison at  $p < 0.05$  for non-officer vs. officer, deck vs. engine, deck vs. galley, and engine vs. galley.

The most frequent causes of illnesses onboard ships were gastrointestinal disorders ( $n = 71$ , 21%) followed by musculoskeletal ( $n = 52$ , 15%) and cardiovascular diseases ( $n = 51$ , 15%) (Figure 1). In general, out of the 85 injuries, 29% were wrist and hand injuries, 21% were knee/lower leg injuries, 13% were head/eye injuries, 12% were lower back/lumbar spine injuries, 8% were thorax/neck injuries (Figure 2).

### **Rank-specific incidence rates of occupational injuries and diseases**

Gastrointestinal diseases were the most common disorders for officers (IR = 3.07 per 1000 seafarer-years) and non-officers (IR = 6.51 per 1000 seafarer-years), as presented in Table 2. The most common injuries for non-officer was wrist/hand (1.93 per 1000 seafarer-years) and knee/lower leg (1.84 per 1000 seafarer-years). The incidence rate ratio (IRR) for non-officers' versus officers was determined and reported in Table 2. As a result, non-officers were more likely than officers to have gastrointestinal (IRR = 2.12), musculoskeletal (IRR = 2.25), and dermatological (IRR = 3.66) disorders. Concerning injuries, non-officers were more likely than officers to be injured in the knee or lower leg (IRR = 4.21) (Table 2).

**Table 2. Incidence Rate of diseases and occupational injuries by the seafarer rank from 2016 to 2019 (n = 379)**

| Medical events             | Officer |      |              | Non-officer |      |             | IRR <sup>a</sup> | 95% CI       | P-value |
|----------------------------|---------|------|--------------|-------------|------|-------------|------------------|--------------|---------|
|                            | No.     | Rate | 95% CI       | No.         | Rate | 95% CI      |                  |              |         |
| <b>Disease types</b>       |         |      |              |             |      |             |                  |              |         |
| Gastrointestinal           | 13      | 3.07 | 1.64 - 5.24  | 49          | 6.51 | 4.82 - 8.59 | 2.12             | 1.13 - 4.26  | 0.011*  |
| Musculoskeletal            | 10      | 2.14 | 1.03 - 3.94  | 40          | 4.82 | 3.45 - 6.56 | 2.25             | 1.11 - 5.05  | 0.016*  |
| Cardiovascular             | 10      | 2.69 | 1.29 - 4.95  | 29          | 4.39 | 2.95 - 6.31 | 1.63             | 0.77 - 3.75  | 0.179   |
| Non-specific               | 12      | 2.86 | 1.47 - 4.99  | 20          | 2.68 | 1.64 - 4.14 | 0.94             | 0.44 - 2.10  | 0.849   |
| Respiratory                | 11      | 2.59 | 1.29 - 4.63  | 17          | 2.25 | 1.31 - 3.60 | 0.87             | 0.38 - 2.05  | 0.711   |
| Dermatological             | 4       | 0.88 | 0.24 - 2.25  | 26          | 3.22 | 2.10 - 4.71 | 3.66             | 1.27 - 14.42 | 0.007*  |
| Genitourinary              | 10      | 2.06 | 0.99 - 3.78  | 11          | 1.27 | 0.64 - 2.28 | 0.62             | 0.24 - 1.63  | 0.280   |
| Eye/Adnexa                 | 6       | 1.31 | 0.48 - 2.86  | 10          | 1.23 | 0.59 - 2.27 | 0.94             | 0.31 - 3.14  | 0.887   |
| Infectious and parasitic   | 5       | 1.26 | 0.40 - 2.94  | 4           | 0.57 | 0.15 - 1.45 | 0.45             | 0.09 - 2.09  | 0.250   |
| Ear/Mastoid                | 2       | 0.41 | 0.05 - 1.49  | 4           | 0.46 | 0.13 - 1.19 | 1.13             | 0.16 - 12.44 | 0.927   |
| Neurological <sup>b</sup>  | —       | —    | —            | 4           | 0.46 | 0.13 - 1.19 | —                | —            | N/A     |
| Mental/behavioral          | 1       | 0.21 | 0.005 - 1.14 | 3           | 0.35 | 0.07 - 1.02 | 1.69             | 0.14 - 88.59 | 0.713   |
| <b>Injury Location</b>     |         |      |              |             |      |             |                  |              |         |
| Wrist/Hand                 | 8       | 1.72 | 0.74 - 3.38  | 16          | 1.93 | 1.11 - 3.14 | 1.13             | 0.45 - 3.03  | 0.801   |
| Knee/lower leg             | 2       | 0.44 | 0.05 - 1.57  | 15          | 1.84 | 1.03 - 3.03 | 4.20             | 1.01 - 38.01 | 0.032*  |
| Head/Eye                   | 3       | 0.76 | 0.16 - 2.21  | 6           | 0.85 | 0.31 - 1.85 | 1.13             | 0.24 - 6.95  | 0.898   |
| Lower back/lumbar spine    | 3       | 0.77 | 0.16 - 2.25  | 5           | 0.73 | 0.24 - 1.69 | 0.94             | 0.18 - 6.07  | 0.911   |
| Thorax/neck                | 1       | 0.21 | 0.005 - 1.14 | 6           | 0.69 | 0.25 - 1.51 | 3.37             | 0.41 - 155   | 0.261   |
| Skin burns                 | 1       | 0.21 | 0.005 - 1.14 | 5           | 0.58 | 0.19 - 1.35 | 2.81             | 0.31 - 133   | 0.369   |
| Upper arm/shoulder         | 1       | 0.27 | 0.006 - 1.53 | 3           | 0.46 | 0.09 - 1.35 | 1.69             | 0.14 - 88.6  | 0.710   |
| Elbow/forearm <sup>b</sup> | —       | —    | —            | 4           | 0.46 | 0.13 - 1.18 | —                | —            | N/A     |

Significant at \*P-value <0.05, <sup>a</sup>IRR calculated as the rate of non-officer/rate of officer, <sup>b</sup>Dashes indicate no case or the rate or the comparison that was not performed, Abbreviation: N/A, not applicable.

### **Worksite-specific incidence rates of diseases and occupational injuries**

Table 3 summarizes the rates of diseases and injuries per seafarer worksite groups. Consequently, gastrointestinal (IR = 7.01), cardiovascular (IR = 6.06) and musculoskeletal (IR = 5.40) diseases were the most common disorders for deck workers. Musculoskeletal disorders (IR = 2.52) were the second most common diseases for engine workers. Wrist/hand injuries (IR = 2.89) were the most common injury for both deck and galley workers, while knee/lower leg injuries (IR = 1.06) were for engine workers (Table 3).

For peer review only

**Table 3. Incidence rates of diseases and occupational injuries by seafarer's worksite from 2016 to 2019 (n= 379)**

| Medical events                        | Deck |      |              | Engine |      |              | Galley |       |              |
|---------------------------------------|------|------|--------------|--------|------|--------------|--------|-------|--------------|
|                                       | No.  | Rate | 95% CI       | No.    | Rate | 95% CI       | No.    | Rate  | 95% CI       |
| <b>Disease types</b>                  |      |      |              |        |      |              |        |       |              |
| Gastrointestinal                      | 33   | 7.01 | 4.83 - 9.83  | 23     | 3.76 | 2.38 - 5.63  | 6      | 6.37  | 2.34 - 13.83 |
| Musculoskeletal                       | 28   | 5.40 | 3.59 - 7.79  | 17     | 2.52 | 1.47 - 4.04  | 5      | 4.82  | 1.56 - 11.22 |
| Cardiovascular                        | 25   | 6.06 | 3.93 - 8.94  | 10     | 1.86 | 0.89 - 3.43  | 4      | 4.85  | 1.32 - 12.38 |
| Non-specific                          | 18   | 3.86 | 2.29 - 6.09  | 13     | 2.15 | 1.14 - 3.66  | 1      | 1.07  | 0.03 - 5.96  |
| Respiratory                           | 18   | 3.82 | 2.26 - 6.02  | 9      | 1.46 | 0.67 - 2.78  | 1      | 1.06  | 0.03 - 5.89  |
| Dermatological                        | 20   | 3.96 | 2.42 - 6.11  | 6      | 0.91 | 0.34 - 1.98  | 4      | 3.96  | 1.08 - 10.09 |
| Genitourinary                         | 11   | 2.04 | 1.02 - 3.65  | 9      | 1.28 | 0.59 - 2.43  | 1      | 0.93  | 0.02 - 5.16  |
| Eye/Adnexa                            | 7    | 1.38 | 0.56 - 2.84  | 8      | 1.21 | 0.52 - 2.39  | 1      | 0.98  | 0.03 - 5.48  |
| Infectious and parasitic <sup>b</sup> | 5    | 1.13 | 0.37 - 2.64  | 4      | 0.69 | 0.19 - 1.79  | —      | —     | —            |
| Ear/Mastoid                           | 1    | 0.19 | 0.004 - 1.03 | 4      | 0.57 | 0.16 - 1.46  | 1      | 10.93 | 0.02 - 5.16  |
| Neurological                          | 2    | 0.37 | 0.05 - 1.34  | 1      | 0.14 | 0.003 - 0.79 | 1      | 0.93  | 0.02 - 5.16  |
| Mental/behavioral <sup>b</sup>        | 3    | 0.56 | 0.12 - 1.62  | 1      | 0.14 | 0.003 - 0.79 | —      | —     | —            |
| <b>Injury Location</b>                |      |      |              |        |      |              |        |       |              |
| Wrist/Hand                            | 15   | 2.89 | 1.62 - 4.77  | 6      | 0.89 | 0.33 - 1.94  | 3      | 2.89  | 0.59 - 8.45  |
| Knee/lower leg <sup>b</sup>           | 10   | 1.96 | 0.94 - 3.61  | 7      | 1.06 | 0.43 - 2.18  | —      | —     | —            |
| Head/Eye                              | 6    | 1.36 | 0.49 - 2.96  | 2      | 0.35 | 0.04 - 1.26  | 1      | 1.13  | 0.03 - 6.30  |
| Lower back/lumbar spine               | 4    | 0.93 | 0.25-2.37    | 3      | 0.54 | 0.11 - 1.56  | 1      | 1.16  | 0.03 - 6.44  |
| Thorax/neck <sup>b</sup>              | 3    | 0.56 | 0.11 - 1.63  | 4      | 0.57 | 0.16 - 1.46  | —      | —     | —            |
| Skin burns                            | 1    | 0.19 | 0.004 - 1.03 | 4      | 0.57 | 0.16 - 1.46  | 1      | 0.93  | 0.02 - 5.16  |
| Upper arm/shoulder <sup>b</sup>       | 1    | 0.25 | 0.006 - 1.38 | 2      | 0.38 | 0.05 - 1.37  | —      | —     | —            |
| Elbow/forearm <sup>b</sup>            | 3    | 0.56 | 0.11-1.63    | —      | —    | —            | 1      | 0.93  | 0.02 - 5.16  |

<sup>b</sup>Dashes indicate no case or the rate that was not performed.



1  
2  
3 The IRRs for deck workers versus engine workers', deck workers versus galley workers', and  
4 engine workers versus galley workers were calculated and presented in Table 4. As a result,  
5 deck workers were more likely than engine workers to have reported gastrointestinal (IRR =  
6 1.86), cardiovascular (IRR = 3.26), dermatological (IRR = 4.35), respiratory (IRR = 2.62),  
7 and musculoskeletal (IRR = 2.14) disorders. Also, deck workers were more likely than engine  
8 workers to be injured in the wrist and hand (IRR = 3.25)(Table 4).  
9  
10  
11  
12  
13  
14  
15  
16  
17  
18  
19  
20  
21  
22  
23  
24  
25  
26  
27  
28  
29  
30  
31  
32  
33  
34  
35  
36  
37  
38  
39  
40  
41  
42  
43  
44  
45  
46  
47  
48  
49  
50  
51  
52  
53  
54  
55  
56  
57  
58  
59  
60

For peer review only

**Table 4. Incidence rate ratios (IRR) and 95% confidence intervals (95% CI) of diseases and occupational injuries stratified by seafarers' worksite from 2016 to 2019 (n = 379)**

| Medical events                        | Deck vs. Engine |              |         | Deck vs. Galley |              |         | Engine vs. Galley |              |         |
|---------------------------------------|-----------------|--------------|---------|-----------------|--------------|---------|-------------------|--------------|---------|
|                                       | IRR             | 95% CI       | p-value | IRR             | 95% CI       | P-value | IRR               | 95% CI       | P-value |
| <b>Disease types</b>                  |                 |              |         |                 |              |         |                   |              |         |
| Gastrointestinal                      | 1.86            | 1.06 – 3.33  | 0.021*  | 1.09            | 0.45 – 3.21  | 0.869   | 0.59              | 0.23 – 1.77  | 0.263   |
| Musculoskeletal                       | 2.14            | 1.13 – 4.17  | 0.013*  | 1.12            | 0.43 – 3.72  | 0.857   | 0.52              | 0.19 – 1.81  | 0.224   |
| Cardiovascular                        | 3.26            | 1.51 – 7.58  | 0.001*  | 1.25            | 0.43 – 4.94  | 0.721   | 0.39              | 0.11 – 1.68  | 0.135   |
| Non-specific                          | 1.80            | 0.83 – 3.99  | 0.108   | 3.59            | 0.57 – 149   | 0.182   | 1.99              | 0.30 – 84.9  | 0.561   |
| Respiratory                           | 2.62            | 1.11 – 6.57  | 0.017*  | 3.59            | 0.56 – 149   | 0.182   | 1.38              | 0.19 – 60.7  | 0.846   |
| Dermatological                        | 4.35            | 1.68 – 13.18 | 0.001*  | 1.00            | 0.34 – 4.03  | 1.044   | 0.23              | 0.05 – 1.11  | 0.053   |
| Genitourinary                         | 1.59            | 0.59 – 4.34  | 0.311   | 2.20            | 0.31 – 94    | 0.494   | 1.38              | 0.19 – 60.68 | 0.846   |
| Eye/Adnexa                            | 1.14            | 0.35 – 3.59  | 0.803   | 1.40            | 0.18 – 63    | 0.837   | 1.23              | 0.17 – 55    | 0.933   |
| Infectious and parasitic <sup>b</sup> | 1.63            | 0.35 – 8.19  | 0.486   | —               | —            | N/A     | —                 | —            | N/A     |
| Ear/Mastoid                           | 0.32            | 0.006 – 3.28 | 0.337   | 0.20            | 0.002 – 15.6 | 0.333   | 0.61              | 0.06 – 30.30 | 0.646   |
| Neurological                          | 2.60            | 0.14 – 153   | 0.485   | 0.40            | 0.02 – 23.5  | 0.495   | 0.15              | 0.001 – 12   | 0.267   |
| Mental/behavioral <sup>b</sup>        | 3.90            | 0.31 – 204   | 0.257   | —               | —            | N/A     | —                 | —            | N/A     |
| <b>Injury Location</b>                |                 |              |         |                 |              |         |                   |              |         |
| Wrist/Hand                            | 3.25            | 1.19 – 10.23 | 0.012*  | 1.00            | 0.28 – 5.39  | 1.050   | 0.31              | 0.06 – 1.90  | 0.130   |
| Knee/lower leg <sup>b</sup>           | 1.86            | 0.64 – 5.75  | 0.216   | —               | —            | N/A     | —                 | —            | N/A     |
| Head/Eye                              | 3.90            | 0.69 – 39.50 | 0.089   | 1.20            | 0.15 – 55    | 0.949   | 0.31              | 0.02 – 18    | 0.398   |
| Lower back/lumbar spine               | 1.73            | 0.29 – 11.80 | 0.494   | 0.80            | 0.08 – 39.7  | 0.794   | 0.46              | 0.04 – 24    | 0.524   |
| Thorax/neck <sup>b</sup>              | 0.98            | 0.14 – 5.76  | 0.987   | —               | —            | N/A     | —                 | —            | N/A     |
| Skin burns                            | 0.33            | 0.01 – 3.28  | 0.337   | 0.20            | 0.003 – 15.7 | 0.333   | 0.62              | 0.06 – 30.30 | 0.646   |
| Upper arm/shoulder <sup>b</sup>       | 0.65            | 0.01 – 12.50 | 0.778   | —               | —            | N/A     | —                 | —            | N/A     |
| Elbow/forearm <sup>b</sup>            | —               | —            | N/A     | 0.60            | 0.05 – 31.5  | 0.649   | —                 | —            | N/A     |

Significant at \*p-value <0.05, <sup>b</sup>Dashes indicate the comparison that was not performed, Abbreviation: N/A, not applicable.

#### 4. DISCUSSION

This descriptive epidemiological study was mainly designed to quantify the incidence rates of reported injuries and diseases among seafarers by worksite and rank groups. We have found that the rates of overall reported diseases were four times higher than the corresponding total reported injuries rates across all worksites. A similar finding was reported from a study conducted in the USA<sup>15</sup>, which reported 2 to 3 times total illnesses higher in the worksites than overall injuries. The overall reported disease rate was 25 per 1,000 seafarer-year during the study period. The disease rate for non-officers and officers were significantly differed [IRR: 1.45 (95% CI) = 1.12 – 1.89]. This study reported that the most common causes of illnesses on board were gastrointestinal (21%), musculoskeletal (15%), and cardiovascular disorders (15%). Similar findings were reported in a Japanese study<sup>22</sup>, which has shown that gastrointestinal (35.5%), musculoskeletal (19.6%), and cardiovascular diseases (11.6%) were the diseases more often occurring onboard ships. Our findings are not consistent with the study conducted in the USA<sup>3</sup>, which reported that dental (26%), respiratory (19%), and dermatological (14%) disorders were in the order the illnesses occurring most often among sailing seafarers.

The majority of gastrointestinal (63%) cases were gastroesophageal reflux (GERD), esophagitis, ulcers, gastritis, hernia, and appendicitis. Our work has demonstrated that non-officers were more likely than officers to have gastrointestinal (IRR = 2.12), musculoskeletal (IRR = 2.25), and dermatological (IRR = 3.66) disorders. This study also revealed that deck workers were more likely than engine workers to have gastrointestinal (IRR = 1.86), dermatological (IRR = 4.35), respiratory (IRR = 2.62), and musculoskeletal (IRR = 2.14) disorders. These might be due to work-related stress because maritime officers, including the captain, have high-level responsibilities such as navigation, planning, organization of loading and unloading operations, and ship controls<sup>19,23</sup>. Non-officers are involved in other tasks occurring during a voyage and their work is physically more demanding and stressful than officers. In general, seafarers have high work-related stressors when compared to ashore workers<sup>20</sup> because their work is characterized by long working hours, often time-pressure, prolonged isolation from family, and hectic activity. Various studies have reported that work-related stress has long been considered a contributing factor in the development of musculoskeletal problems<sup>24</sup> and gastrointestinal disorders<sup>25</sup>. Similarly, as for dermatological disorders, it might result in skin exposure to risk factors in the workplace. Seafaring is a risky activity characterized by exposure to different skin risk factors such as seawater, humidity, solar radiation, and others<sup>26,27</sup>. Deck crews are frequently engaged in maintenance, repair,

1  
2  
3 loading, painting activities, and exposure to chemicals, UV radiation, and other skin risk  
4 factors<sup>28,29</sup>. This study also reported the same rate of dermatological disorders for the deck  
5 (IR = 3.96) and galley (IR = 3.96) workers. However, this could be due to the small number  
6 of cases among galley workers, and even the estimated non-cases of galley workers are not  
7 comparable in number to deck workers' non-cases. Consequently, 95% of the confidence  
8 interval was wider for the case rate among the galley workers. The IRR results in the  
9 comparison made between the workers on deck and in the galley were also not statistically  
10 significant ( $p = 1.044$ ) on this matter. Further studies are needed to measure the effect of  
11 differences in the workplace of deck and galley workers on dermatological disease rates.  
12

13  
14  
15  
16  
17 Angina pectoris (39% of all CVD diagnoses) was the most frequently reported cardiovascular  
18 disorders in this study. As for cardiovascular disorders, it could be related to lifestyle,  
19 especially a high-fat diet, drinking, smoking and physical inactivity. A study conducted on the  
20 board of Italian flagship (2019) reported that more than 40% and 10% of seafarers were  
21 overweight and obese, respectively<sup>30</sup>. This finding suggests that in seafarer's CVD risk factors  
22 are higher compared to ashore workers. We found that cardiovascular (IR = 6.06) disorders  
23 were the second most common diseases for deck workers and deck workers were also more  
24 likely than engine worker to have reported cardiovascular diseases (IRR = 3.26). This might  
25 be due to work-related stress because deck workers have high work-related stress due to  
26 sleep interruption, high job demands, night shift work, and intense activity than engine  
27 workers. A study reported that work related stress was a risk factor for cardiovascular  
28 diseases<sup>31</sup>. Long working hours are contributing factors to work-related stress, and it is logical  
29 to expect an association between long hours and cardiovascular disorders<sup>32,33</sup>. Studies have  
30 also shown that night shift work had adverse effects on health and risk factors for the  
31 development of chronic diseases such as cardiovascular diseases<sup>19,34,35</sup>. The relationship  
32 between stress and coronary heart disease are considered to be linked to multiple and  
33 protracted increases in heart rate and blood pressure resulting from neuroendocrine  
34 activation<sup>36-39</sup>. Other studies have reported that work-related stress can increase the  
35 cardiovascular risk of workers<sup>40-42</sup>. On the other hand, cardiovascular diseases and metabolic  
36 disorders are stress-related diseases<sup>43</sup>.  
37  
38  
39  
40  
41  
42  
43  
44  
45  
46  
47

48  
49 The total reported injury rate was 6.31 per 1,000 seafarer-year over four years' study period.  
50 The injury rate for non-officers and officers were significantly differed [IRR: 1.75 (95% CI) =  
51 1.75 – 3.10]. Nearly 30% of injuries occurred in the wrist and hand, followed by the knee and  
52 lower leg (21%). Our results agree with the study conducted in the Danish-flagged merchant  
53 fleet<sup>18</sup>, which reported 36% and 18% of upper and lower limb injuries, respectively. Moreover,  
54  
55  
56  
57

1  
2  
3 this study revealed that non-officers were more likely than officers to be injured (IRR = 1.75).  
4 This finding was in agreement with the previous studies<sup>17,3,44</sup>. Non-officer work is  
5 characterized by mooring, cleaning the ship, repairing broken cables and ropes, operating  
6 machinery such as cranes and drilling towers, and steering the ship at sea<sup>20,23</sup>. The non-officer  
7 work is also physically challenging<sup>19,20,23</sup> and must be carried out regardless of weather  
8 conditions. This could explain why non-officers have a higher rate of injuries than officers.  
9  
10  
11

12  
13 The present study has shown that the deck workers had higher rates of overall reported  
14 injuries (IR = 8.69) compared to the engine (IR = 4.35) workers. These results are consistent  
15 with those of the study conducted in the USA<sup>15</sup>. We found also the injury rate for deck workers  
16 and engine workers were significantly differed [IRR: 1.99 (95% CI) =1.21 – 3.34]. Similarly,  
17 deck workers were more likely than engine workers to be injured in the wrist and hand (IRR  
18 = 3.25), as shown in Table 4. A study conducted in Danish Fleet seafarers<sup>44</sup> reported that  
19 deck workers had a relatively low risk for injuries compared to machine (engine) workers.  
20 The difference could be due to methodological differences. The study on seafarers in the  
21 Danish fleet was a questionnaire-based survey. Furthermore, denominators, used to  
22 determine incidence rates and incidence rate ratios in the Danish fleet, were not consistent  
23 with our study. Deck workers, particularly deck ratings, perform physical works such as  
24 mooring and unmooring the ship, loading, and unloading cargo<sup>23</sup>. Moreover, deck workers  
25 have a shorter sleeping time and sleep interruptions more often than engine workers because  
26 they are engaged in the surveillance system with frequent irregular operations. These include  
27 monitoring the bridge or gangway, acting as lookouts on the bridge, or carrying out repairs  
28 and maintenance work in the deck area<sup>19,20,23</sup>. Hence, night shift work, long working hours,  
29 short average sleep time, and physical stress are important factors contributing to the high  
30 rates of injuries/accidents at sea<sup>10,19,45,46</sup>.  
31  
32  
33  
34  
35  
36  
37  
38  
39  
40

### 41 **Strengths and limitations**

42  
43 This study measured the incidence rates of reported injury and disease to TMAS for container  
44 ships. Most of the previous studies on diseases and injuries among seafarers were focused on  
45 the number of cases. As far as we know, this study is the first study to measure the  
46 contribution of differences in rank and job to the rates of injury and disease of seafarers  
47 onboard container ships. Limitations of this study are: 1). We used an estimated average  
48 number of seafarers per ship in the analysis, although we took into account different  
49 assumptions, including the number of vessels, ships active at sea, number of crew members  
50 per ship, and the length of stay of seafarers on board for the accuracy of the estimate.  
51 Consequently, the incidence rate may be underestimated or overestimated. 2). Data from  
52  
53  
54  
55  
56  
57  
58  
59  
60

1  
2  
3 patients with injuries and cases of disease contained descriptions such as age and gender,  
4 but we had no descriptions of these data on the total at-risk seafarer population. Hence, we  
5 have not determined the rates and incidence rate ratios of the diseases and injuries by  
6 seafarers' age and sex. 3). Patient data on both injury and diagnosis were compiled according  
7 to the revised WHO ICD10 codes and the injury's anatomic location in the database, but not  
8 on mechanisms of injury or potential physical hazards related to injured cases. As a result,  
9 we have not stratified injuries by mechanisms of injury or occupational hazards to highlight  
10 priority areas and recommend preventative measures. 4). We did not have descriptions of  
11 data types such as socio-demographic variables and another exposure status of the total  
12 seafarer population at risk. In this respect, we have not determined the risk factors for injury  
13 and disease to propose further prevention strategies. Furthermore, this study is a  
14 retrospective study and limited to the variables available in the dataset. Finally, our study is  
15 limited to container ships and does not represent other types of ships at sea. Hence, the  
16 results do not reflect seafarers working on other types of ships.

## 25 **CONCLUSION**

26  
27 The results of this study were based on the medical events (diseases and occupational  
28 injuries) of seafarers while working on board container ships. Non-officers had significantly  
29 higher rates of reported gastrointestinal, musculoskeletal, and dermatological disorders  
30 compared to officers. Also, non-officers were more likely than officers to be injured in the  
31 knee and lower leg. Deck workers had significantly higher rates for dermatological,  
32 cardiovascular, musculoskeletal, respiratory, and gastrointestinal disorders when compared  
33 to engine workers. Deck workers were more likely than engine workers to be injured in the  
34 wrist and hand. In general, the total reported injury and disease rates for non-officers were  
35 significantly higher compared to officers. The same is true for deck workers compared to  
36 engine workers. Hence, this study suggests the need for rank and work site-specific  
37 prevention strategies to reduce injury and disease rates at the workplace. Future studies  
38 should consider the risk factors for injury and disease among seafarers in order to propose  
39 further preventive measures.

## 48 **Contributors**

49  
50 GGS.: conceived and designed the study, performed analysis, methodology, interpreted the  
51 data and results, and drafted the initial manuscript. MD: extracted data and assisted with  
52 the preparation of the manuscript. GB.: contributed to the data collection. MAS: interpreted  
53  
54  
55  
56  
57  
58  
59

1  
2  
3 the data and involved in the preparation of the manuscript. FA: guided, edited, reviewed, and  
4 approved the study. All authors approved the final version of the manuscript.  
5  
6  
7

8 **Funding:** This work was supported by the International Transport Workers Federation (ITF)  
9 Trust, London, UK, under grant number 558 to C.I.R.M. Institutional funding of the University of  
10 Camerino, Italy, supported Ph.D. bursaries to GGS and GB.  
11  
12  
13

#### 14 **Conflict of interests**

15  
16 The authors declared that they have no conflict of interest.  
17  
18  
19  
20  
21  
22  
23  
24  
25

#### 26 **Ethical approval**

27  
28 The study has been reviewed and approved by the Scientific/Ethics Committee of the C.I.R.M.  
29 Foundation.  
30  
31

32 **Patient consent for publication:** Not required  
33

34 **Data availability statement:** No additional data available  
35  
36

#### 37 **ORCID iD**

38  
39 Getu Gamo Sagaro <https://orcid.org/0000-0002-5983-0266>  
40

41 Gopi Battenini <https://orcid.org/0000-0003-0603-2356>  
42  
43

44 Francesco Amenta <https://orcid.org/0000-0002-0555-1034>  
45  
46  
47  
48  
49  
50  
51  
52  
53  
54  
55  
56  
57  
58  
59  
60

**REFERENCES**

1. BIMCO, ICS. "Manpower Report-The global supply and demand for seafarers. *Exec Summ*. Published online 2015:6. <http://www.ics-shipping.org/docs/default-source/resources/safety-security-and-operations/manpower-report-2015-executive-summary.pdf?sfvrsn=16>
2. Telemedicine: revolutionising healthcare for seafarers. Accessed August 10, 2019. <https://www.ship-technology.com/features/featuretelemedicine-revolutionising-healthcare-for-seafarers-5673476/>
3. Lefkowitz RY, Redlich CA, Mph MDS. Injury , illness , and disability risk in American seafarers. *Am J Ind Med*. 2018;61:120-129. doi:10.1002/ajim.22802
4. IMO (International Maritime Organization). Accessed October 12, 2019. <https://business.un.org/en/entities/13>
5. Center for Maritime Safety and Health Studies. Published online 2019. Accessed October 12, 2019. [https://www.cdc.gov/niosh/programs/cmshs/port\\_operations.html](https://www.cdc.gov/niosh/programs/cmshs/port_operations.html)
6. Mulić, Rosanda, Pero Vidan and RB. Comparative analysis of medical assistance to seafarers in the world and the republic of Croatia. *15th Int Conf Transp Sci*. Published online 2012:1-8. [https://bib.irb.hr/datoteka/587264.Mulic\\_Vidan\\_Bosnjak.pdf](https://bib.irb.hr/datoteka/587264.Mulic_Vidan_Bosnjak.pdf)
7. Roberts SE, Nielsen D, Kotłowski A, Jaremin B. Fatal accidents and injuries among merchant seafarers worldwide. *Occup Med (Chic Ill)*. 2014;64:259-266. doi:10.1093/occmed/kqu017
8. Borch DF, Hansen HL, Burr H, Jepsen JR. Surveillance of maritime deaths on board Danish merchant ships , 1986 – 2009. Published online 2012:7-16.
9. Roberts SE, Hansen HL. An analysis of the causes of mortality among seafarers in the British merchant fleet (1986-1995) and recommendations for their reduction. *Occup Med (Chic Ill)*. 2002;52:195-202. doi:10.1093/occmed/52.4.195
10. Berg HP. Human Factors and Safety Culture in Maritime Safety ( revised ). *Mar Navig Saf Sea Transp STCW, Marit Educ Train (MET), Hum Resour Crew Manning, Marif Policy, Logist Econ Matters*. 2013;7(3):107-115. doi:10.12716/1001.07.03.04
11. Carter T. Mapping the knowledge base for maritime health: 1 historical perspective.



- 1  
2  
3 *Int Marit Health*. 2011;62(4):210-216.  
4  
5  
6 12. Carter T. Mapping the knowledge base for maritime health: 2. a framework for  
7 analysis. *Int Marit Health*. 2011;62(4):217-223. Accessed October 12, 2019.  
8 <http://www.ncbi.nlm.nih.gov/pubmed/22544496>  
9  
10  
11 13. Carter T. Mapping the knowledge base for maritime health: 3 illness and injury in  
12 seafarers. *Int Marit Health*. 2011;62(4):224-240.  
13  
14  
15 14. Carter T. Mapping the knowledge base for maritime health: 4 safety and performance  
16 at sea. *Int Marit Health*. 2011;62(4):236-244. Accessed October 12, 2019.  
17 <http://www.ncbi.nlm.nih.gov/pubmed/22544498>  
18  
19  
20 15. Lefkowitz RY, Slade MD, Redlich CA. "Injury, illness, and work restriction in merchant  
21 seafarers." *Am J Ind Med*. 2015;58(6):688-696. doi:10.1002/ajim.22459  
22  
23  
24 16. Hannerz H. Hospitalisations among seafarers on merchant ships. *Occup Env Med*.  
25 2005;62:145-150. doi:10.1136/oem.2004.014779  
26  
27  
28 17. Kaerlev L, Jensen A, Nielsen PS, Olsen J, Hannerz H, Tüchsen F. Hospital contacts for  
29 injuries and musculoskeletal diseases among seamen and fishermen : A population-  
30 based cohort study. *BioMed Cent*. 2008;9:1-9. doi:10.1186/1471-2474-9-8  
31  
32  
33 18. Herttua K, Gerdøe S, Vork JC, Nielsen JB. Age and nationality in relation to injuries  
34 at sea among officers and non- - officers : a study based on contacts from ships to  
35 Telemedical Assistance Service in Denmark. *BMJ Open*. 2019;9:1-7.  
36 doi:10.1136/bmjopen-2019-034502  
37  
38  
39  
40 19. Oldenburg M, Jensen HJ. Stress and strain among seafarers related to the  
41 occupational groups. *Int J Environ Res Public Health*. 2019;16(7).  
42 doi:10.3390/ijerph16071153  
43  
44  
45 20. Oldenburg M, Jensen HJ, Latza U, Baur X. Seafaring stressors aboard merchant and  
46 passenger ships. *Int J Public Health*. 2009;54(2):96-105. doi:10.1007/s00038-009-  
47 7067-z  
48  
49  
50  
51 21. Mahdi SS, Amenta F. Eighty years of CIRM. A journey of commitment and dedication  
52 in providing maritime medical assistance. *Int Marit Health*. 2016;67(4):187-195.  
53 doi:10.5603/imh.2016.0036  
54  
55  
56  
57  
58  
59  
60

- 1
  - 2
  - 3
  - 4
  - 5
  - 6
  - 7
  - 8
  - 9
  - 10
  - 11
  - 12
  - 13
  - 14
  - 15
  - 16
  - 17
  - 18
  - 19
  - 20
  - 21
  - 22
  - 23
  - 24
  - 25
  - 26
  - 27
  - 28
  - 29
  - 30
  - 31
  - 32
  - 33
  - 34
  - 35
  - 36
  - 37
  - 38
  - 39
  - 40
  - 41
  - 42
  - 43
  - 44
  - 45
  - 46
  - 47
  - 48
  - 49
  - 50
  - 51
  - 52
  - 53
  - 54
  - 55
  - 56
  - 57
  - 58
  - 59
  - 60
22. Ehara M, Muramatsu S, Sano Y, Takeda S, Hisamune S. The tendency of diseases among seamen during the last fifteen years in Japan. *Ind Health*. 2006;44(1):155-160. doi:10.2486/indhealth.44.155
23. STCW. International Convention on Standards of Training, Certification and Watchkeeping for Seafarers. IMO. Published 1995. Accessed May 2, 2020. <http://www.imo.org/en/OurWork/humanelement/trainingcertification/pages/stcw-convention.aspx>
24. Leino P. Symptoms of stress predict musculoskeletal disorders. *J Epidemiol Community Health*. 1989;43(3):293-300. doi:10.1136/jech.43.3.293
25. Lim SK, Yoo SJ, Koo DL, et al. Stress and sleep quality in doctors working on-call shifts are associated with functional gastrointestinal disorders. *World J Gastroenterol*. 2017;23(18):3330-3337. doi:10.3748/wjg.v23.i18.3330
26. Caruso G. "Do seafarers have sunshine." 8th International Symposium on Maritime Health (ISMH) Book of abstracts. Published online 2005.
27. Laraqui O, Manar N, Laraqui S, et al. Prevalence of skin diseases amongst Moroccan fishermen. *Int Marit Health*. 2018;69(1):22-27. doi:10.5603/IMH.2018.0004
28. Meyer G, Siekmann H, Feister U, Felten C HJ. Measurement of sunlight exposure in seafaring [Ermittlung der natürlichen UV-Strahlenexposition in der Seeschiffahrt]. 50. Jahrestagung der Deutschen Gesellschaft für Arbeitsmedizin und Umweltmedizin (DGAUM). *Eur J Dermatol*. Published online 2010:434-436.
29. Oldenburg M, Kuechmeister B, Ohnemus U, Baur X, Moll I. Extrinsic skin ageing symptoms in seafarers subject to high work-related exposure to UV radiation. *Eur J Dermatology*. 2013;23(5):663-670. doi:10.1684/ejd.2013.2142
30. Nittari G, Tomassoni D, Di Canio M, et al. Overweight among seafarers working on board merchant ships. *BMC Public Health*. 2019;19(1):1-8. doi:10.1186/s12889-018-6377-6
31. Kivimäki M, Kawachi I. Work Stress as a Risk Factor for Cardiovascular Disease. *Curr Cardiol Rep*. 2015;17(9). doi:10.1007/s11886-015-0630-8
32. Virtanen M, Heikkilä K, Jokela M, et al. Long working hours and coronary heart disease: A systematic review and meta-analysis. *Am J Epidemiol*. 2012;176(7):586-

- 1  
2  
3 596. doi:10.1093/aje/kws139  
4  
5  
6 33. Shin K, Chung Y, Kwon ÆY. The Effect of Long Working Hours on Cerebrovascular and  
7 Cardiovascular Disease ; A Case-Crossover Study. 2017;761(December 2016):753-  
8 761. doi:10.1002/ajim.22688.  
9  
10  
11 34. Boivin DB, Boudreau P. Impacts of shift work on sleep and circadian rhythms. *Pathol*  
12 *Biol.* 2014;62(5):292-301. doi:10.1016/j.patbio.2014.08.001  
13  
14  
15 35. Hermansson J, Hallqvist J, Karlsson B, Knutsson A, Gådin KG. Shift work, parental  
16 cardiovascular disease and myocardial infarction in males. *Occup Med (Chic Ill)*.  
17 2018;68(2):120-125. doi:10.1093/occmed/kqy008  
18  
19  
20 36. Steptoe A, Kivimäki M. Stress and cardiovascular disease. *Nat Rev Cardiol*.  
21 2012;9(6):360-370. doi:10.1038/nrcardio.2012.45  
22  
23  
24 37. Li J, Zhang M, Loerbroks A, Angerer P, Siegrist J. Work stress and the risk of  
25 recurrent coronary heart disease events: A systematic review and meta-analysis. *Int*  
26 *J Occup Med Environ Health*. 2015;28(1):8-19. doi:10.2478/s13382-014-0303-7  
27  
28  
29 38. Dragano N, Siegrist J, Nyberg ST, et al. Effort-Reward Imbalance at Work and  
30 Incident Coronary Heart Disease: A Multicohort Study of 90,164 Individuals.  
31 *Epidemiology*. 2017;28(4):619-626. doi:10.1097/EDE.0000000000000666  
32  
33  
34  
35 39. Sara JD, Prasad M, Eleid MF, Zhang M, Jay Widmer R, Lerman A. Association between  
36 work-related stress and coronary heart disease: A review of prospective studies  
37 through the job strain, effort-reward balance, and organizational justice models. *J Am*  
38 *Heart Assoc*. 2018;7(9):1-15. doi:10.1161/JAHA.117.008073  
39  
40  
41  
42 40. Kivimäki M, Virtanen M, Elovainio M, Kouvonen A, Väänänen A, Vahtera J. Work  
43 stress in the etiology of coronary heart disease - A meta-analysis. *Scand J Work*  
44 *Environ Heal*. 2006;32(6):431-442. doi:10.5271/sjweh.1049  
45  
46  
47 41. Jaremin B KE. Myocardial infarction (MI) at the work-site among Polish seafarers. The  
48 risk and the impact of occupational factors. *Int Marit Heal*. 2003;54(1-4):26-39.  
49  
50  
51 42. Filikowski J, Rzepliak M, Renke W, Winnicka A SD. Selected risk factors of ischemic  
52 heart disease in Polish seafarers. Preliminary report. *Int Marit Heal*. 2003;54(1-4):40-  
53 46.  
54  
55  
56  
57  
58  
59  
60

- 1  
2  
3 43. Siegrist J, Rodel A. Work stress and health risk behavior. *Scand J Work Env Heal*.  
4 2006;32(6):473-481. doi:10.5271/sjweh.1052  
5  
6  
7 44. Jensen OC, Sørensen JF, Canals ML, Hu YP, Nikolic N TM. Incidence of self-reported  
8 occupational injuries in seafaring — an international study. *Occup Med*.  
9 2004;54(8):548-555. doi:10.1093/occmed/kqh090  
10  
11  
12 45. Harrington JM. Health effects of shift work and extended hours of work. *Occup*  
13 *Environ Med*. 2001;58(1):68-72.  
14  
15  
16 46. Spurgeon A, Harrington JM, Cooper CL. Health and safety problems associated with  
17 long working hours: A review of the current position. *Occup Environ Med*.  
18 1997;54(6):367-375. doi:10.1136/oem.54.6.367  
19  
20  
21  
22  
23  
24  
25

### **Legends of the figures**

26  
27  
28  
29 Figure 1. Diagnosis of seafarers according to WHO ICD 10<sup>th</sup> category from 2016 to 2019 (n =  
30 338)  
31

32  
33 Figure 2: Distribution of injured body parts of seafarers with injuries from 2016 to  
34 2019 (n = 85)  
35  
36  
37  
38  
39  
40  
41  
42  
43  
44  
45  
46  
47  
48  
49  
50  
51  
52  
53  
54  
55  
56  
57  
58  
59  
60

1  
2  
3  
4  
5  
6  
7  
8  
9  
10  
11  
12  
13  
14  
15  
16  
17  
18  
19  
20  
21  
22  
23  
24  
25  
26  
27  
28  
29  
30  
31  
32  
33  
34  
35  
36  
37  
38  
39  
40  
41  
42  
43  
44  
45  
46  
47  
48  
49  
50  
51  
52  
53  
54  
55  
56  
57  
58  
59  
60

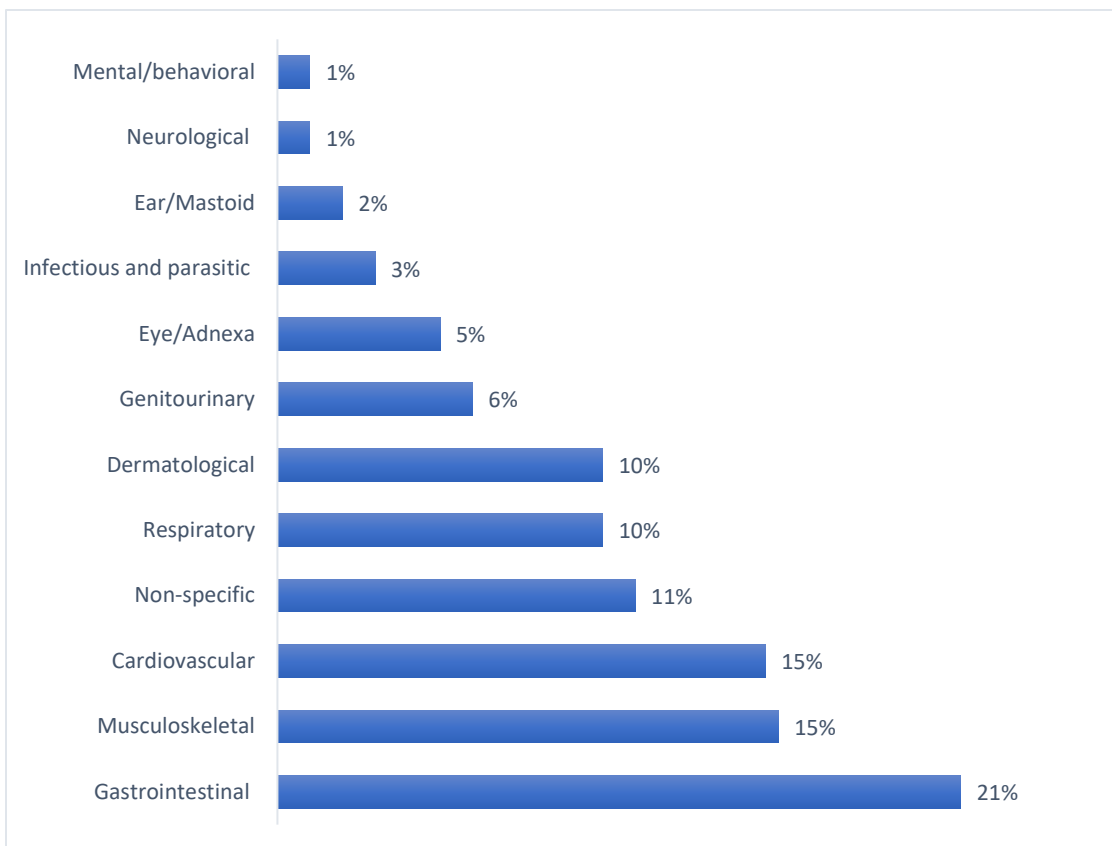

Figure 1

view only

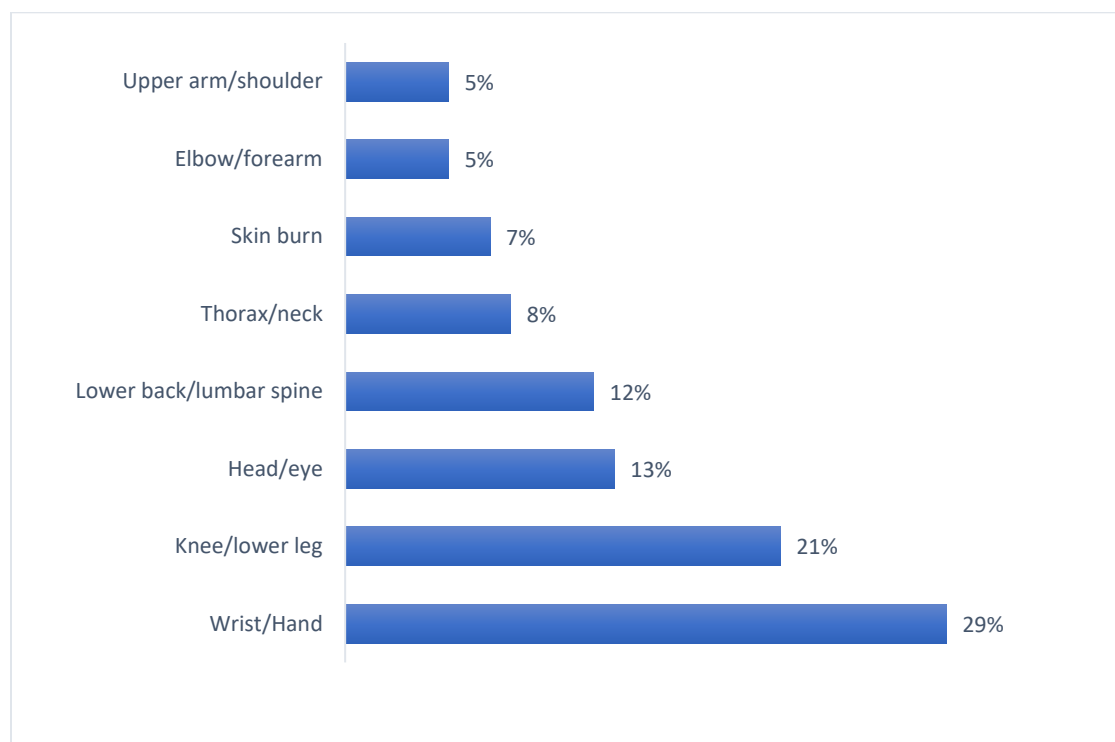

Figure 2

**STROBE 2007 (v4) Statement—Checklist of items that should be included in reports of *cohort studies***

| Section/Topic                | Item # | Recommendation                                                                                                                                                                       | Reported on page # |
|------------------------------|--------|--------------------------------------------------------------------------------------------------------------------------------------------------------------------------------------|--------------------|
| <b>Title and abstract</b>    | 1      | (a) Indicate the study's design with a commonly used term in the title or the abstract                                                                                               | 1                  |
|                              |        | (b) Provide in the abstract an informative and balanced summary of what was done and what was found                                                                                  | 2                  |
| <b>Introduction</b>          |        |                                                                                                                                                                                      |                    |
| Background/rationale         | 2      | Explain the scientific background and rationale for the investigation being reported                                                                                                 | 4                  |
| Objectives                   | 3      | State specific objectives, including any prespecified hypotheses                                                                                                                     | 5                  |
| <b>Methods</b>               |        |                                                                                                                                                                                      |                    |
| Study design                 | 4      | Present key elements of study design early in the paper                                                                                                                              | 5                  |
| Setting                      | 5      | Describe the setting, locations, and relevant dates, including periods of recruitment, exposure, follow-up, and data collection                                                      | 5                  |
| Participants                 | 6      | (a) Give the eligibility criteria, and the sources and methods of selection of participants. Describe methods of follow-up                                                           | 6 & 7              |
|                              |        | (b) For matched studies, give matching criteria and number of exposed and unexposed                                                                                                  |                    |
| Variables                    | 7      | Clearly define all outcomes, exposures, predictors, potential confounders, and effect modifiers. Give diagnostic criteria, if applicable                                             |                    |
| Data sources/<br>measurement | 8*     | For each variable of interest, give sources of data and details of methods of assessment (measurement). Describe comparability of assessment methods if there is more than one group | 5 & 6              |
| Bias                         | 9      | Describe any efforts to address potential sources of bias                                                                                                                            | 6                  |
| Study size                   | 10     | Explain how the study size was arrived at                                                                                                                                            | 6                  |
| Quantitative variables       | 11     | Explain how quantitative variables were handled in the analyses. If applicable, describe which groupings were chosen and why                                                         | 6                  |
| Statistical methods          | 12     | (a) Describe all statistical methods, including those used to control for confounding                                                                                                | 6 & 7              |
|                              |        | (b) Describe any methods used to examine subgroups and interactions                                                                                                                  |                    |
|                              |        | (c) Explain how missing data were addressed                                                                                                                                          | 6                  |
|                              |        | (d) If applicable, explain how loss to follow-up was addressed                                                                                                                       |                    |
|                              |        | (e) Describe any sensitivity analyses                                                                                                                                                |                    |
| <b>Results</b>               |        |                                                                                                                                                                                      |                    |

|                          |     |                                                                                                                                                                                                                                                                                                                                                                                                               |                 |
|--------------------------|-----|---------------------------------------------------------------------------------------------------------------------------------------------------------------------------------------------------------------------------------------------------------------------------------------------------------------------------------------------------------------------------------------------------------------|-----------------|
| Participants             | 13* | (a) Report numbers of individuals at each stage of study—eg numbers potentially eligible, examined for eligibility, confirmed eligible, included in the study, completing follow-up, and analysed<br>(b) Give reasons for non-participation at each stage<br>(c) Consider use of a flow diagram                                                                                                               |                 |
| Descriptive data         | 14* | (a) Give characteristics of study participants (eg demographic, clinical, social) and information on exposures and potential confounders<br>(b) Indicate number of participants with missing data for each variable of interest<br>(c) Summarise follow-up time (eg, average and total amount)                                                                                                                | 5&6<br>6        |
| Outcome data             | 15* | Report numbers of outcome events or summary measures over time                                                                                                                                                                                                                                                                                                                                                | 6               |
| Main results             | 16  | (a) Give unadjusted estimates and, if applicable, confounder-adjusted estimates and their precision (eg, 95% confidence interval). Make clear which confounders were adjusted for and why they were included<br>(b) Report category boundaries when continuous variables were categorized<br>(c) If relevant, consider translating estimates of relative risk into absolute risk for a meaningful time period | 7, 8, 9,11 & 13 |
| Other analyses           | 17  | Report other analyses done—eg analyses of subgroups and interactions, and sensitivity analyses                                                                                                                                                                                                                                                                                                                |                 |
| <b>Discussion</b>        |     |                                                                                                                                                                                                                                                                                                                                                                                                               |                 |
| Key results              | 18  | Summarise key results with reference to study objectives                                                                                                                                                                                                                                                                                                                                                      | 14, 15 & 16     |
| <b>Limitations</b>       |     |                                                                                                                                                                                                                                                                                                                                                                                                               |                 |
| Interpretation           | 20  | Give a cautious overall interpretation of results considering objectives, limitations, multiplicity of analyses, results from similar studies, and other relevant evidence                                                                                                                                                                                                                                    | 16 & 17         |
| Generalisability         | 21  | Discuss the generalisability (external validity) of the study results                                                                                                                                                                                                                                                                                                                                         | 17              |
| <b>Other information</b> |     |                                                                                                                                                                                                                                                                                                                                                                                                               |                 |
| Funding                  | 22  | Give the source of funding and the role of the funders for the present study and, if applicable, for the original study on which the present article is based                                                                                                                                                                                                                                                 | 18              |

\*Give information separately for cases and controls in case-control studies and, if applicable, for exposed and unexposed groups in cohort and cross-sectional studies.

**Note:** An Explanation and Elaboration article discusses each checklist item and gives methodological background and published examples of transparent reporting. The STROBE checklist is best used in conjunction with this article (freely available on the Web sites of PLoS Medicine at <http://www.plosmedicine.org/>, Annals of Internal Medicine at <http://www.annals.org/>, and Epidemiology at <http://www.epidem.com/>). Information on the STROBE Initiative is available at [www.strobe-statement.org](http://www.strobe-statement.org).



# BMJ Open

## **Incidence of occupational injuries and diseases among seafarers: a descriptive epidemiological study based on contacts from onboard ships to the Italian Telemedical Maritime Assistance service in Rome, Italy**

|                                 |                                                                                                                                                                                                                                                                                                                                                                                                                                                                                                                                                                                                                                          |
|---------------------------------|------------------------------------------------------------------------------------------------------------------------------------------------------------------------------------------------------------------------------------------------------------------------------------------------------------------------------------------------------------------------------------------------------------------------------------------------------------------------------------------------------------------------------------------------------------------------------------------------------------------------------------------|
| Journal:                        | <i>BMJ Open</i>                                                                                                                                                                                                                                                                                                                                                                                                                                                                                                                                                                                                                          |
| Manuscript ID                   | bmjopen-2020-044633.R3                                                                                                                                                                                                                                                                                                                                                                                                                                                                                                                                                                                                                   |
| Article Type:                   | Original research                                                                                                                                                                                                                                                                                                                                                                                                                                                                                                                                                                                                                        |
| Date Submitted by the Author:   | 17-Feb-2021                                                                                                                                                                                                                                                                                                                                                                                                                                                                                                                                                                                                                              |
| Complete List of Authors:       | Sagaro, Getu Gamo; University of Camerino, Telemedicine and Telepharmacy Center, School of Medicinal and Health Products Sciences Dicanio, Marzio; Research Department, International Radio Medical Centre (C.I.R.M.), Battineni, Gopi ; University of Camerino, Telemedicine and Telepharmacy Center, School of Medicinal and Health Products Sciences Samad, Marc; CMA-CGM, Tour CMA CGM, 4 Quai d'Arenc, 13002 Marseille Amenta, Francesco; University of Camerino, Telemedicine and Telepharmacy Center, School of Medicinal and Health Products Sciences; Research Department, International Radio Medical Center (C.I.R.M.), 00144 |
| <b>Primary Subject Heading</b>: | Epidemiology                                                                                                                                                                                                                                                                                                                                                                                                                                                                                                                                                                                                                             |
| Secondary Subject Heading:      | Epidemiology, Health informatics, Cardiovascular medicine, Occupational and environmental medicine                                                                                                                                                                                                                                                                                                                                                                                                                                                                                                                                       |
| Keywords:                       | Epidemiology < TROPICAL MEDICINE, EPIDEMIOLOGY, Epidemiology < INFECTIOUS DISEASES, OCCUPATIONAL & INDUSTRIAL MEDICINE                                                                                                                                                                                                                                                                                                                                                                                                                                                                                                                   |
|                                 |                                                                                                                                                                                                                                                                                                                                                                                                                                                                                                                                                                                                                                          |

SCHOLARONE™  
Manuscripts



I, the Submitting Author has the right to grant and does grant on behalf of all authors of the Work (as defined in the below author licence), an exclusive licence and/or a non-exclusive licence for contributions from authors who are: i) UK Crown employees; ii) where BMJ has agreed a CC-BY licence shall apply, and/or iii) in accordance with the terms applicable for US Federal Government officers or employees acting as part of their official duties; on a worldwide, perpetual, irrevocable, royalty-free basis to BMJ Publishing Group Ltd ("BMJ") its licensees and where the relevant Journal is co-owned by BMJ to the co-owners of the Journal, to publish the Work in this journal and any other BMJ products and to exploit all rights, as set out in our [licence](#).

The Submitting Author accepts and understands that any supply made under these terms is made by BMJ to the Submitting Author unless you are acting as an employee on behalf of your employer or a postgraduate student of an affiliated institution which is paying any applicable article publishing charge ("APC") for Open Access articles. Where the Submitting Author wishes to make the Work available on an Open Access basis (and intends to pay the relevant APC), the terms of reuse of such Open Access shall be governed by a Creative Commons licence – details of these licences and which [Creative Commons](#) licence will apply to this Work are set out in our licence referred to above.

Other than as permitted in any relevant BMJ Author's Self Archiving Policies, I confirm this Work has not been accepted for publication elsewhere, is not being considered for publication elsewhere and does not duplicate material already published. I confirm all authors consent to publication of this Work and authorise the granting of this licence.

1  
2  
3 **Incidence of occupational injuries and diseases among seafarers: a**  
4 **descriptive epidemiological study based on contacts from onboard ships to**  
5 **the Italian Telemedical Maritime Assistance service in Rome, Italy**  
6

7 *Getu Gamo Sagaro*<sup>1\*</sup>, *Marzio Dicario*<sup>2</sup>, *Gopi Battineni*<sup>1</sup>, *Marc Abdul Samad*<sup>3</sup> and *Francesco*  
8 *Amenta*<sup>1,2</sup>  
9

10  
11  
12 <sup>1</sup>Telemedicine and Telepharmacy Center, School of Medicinal and Health Products Sciences,  
13 University of Camerino, 62032 Camerino, Italy  
14

15  
16 <sup>2</sup>Research Department, Internazionale Radio Medical Center (C.I.R.M), 00144 Rome, Italy  
17

18 <sup>3</sup>CMA-CGM, Tour CMA CGM, 4 Quai d'Arenc, 13002 Marseille, France  
19  
20  
21  
22  
23

24 **Corresponding Author:**  
25

26 Getu Gamo Sagaro (Ph.D.)  
27 Telemedicine and Telepharmacy Center  
28 School of Medicinal and Health Products Sciences,  
29 University of Camerino  
30 62032 Camerino MC, Italy  
31 E-mail: [getugamo.sagaro@unicam.it](mailto:getugamo.sagaro@unicam.it)  
32  
33  
34  
35  
36  
37  
38  
39  
40  
41  
42  
43  
44  
45  
46  
47  
48  
49  
50  
51  
52  
53  
54  
55  
56  
57  
58  
59  
60

## Abstract

**Objectives:** Workers at sea have high mortality, injuries, and illnesses and work in a hazardous environment compared to ashore workers. The present study was designed to measure the incidence of occupational injuries and diseases among seafarers and quantify the contribution of differences in rank and job onboard on seafarers' diseases and injuries rates.

**Design:** Descriptive epidemiological study

**Setting and participants:** This study's data were based on contacts (n = 423) for medical requests from CMA CGM container ships to the Italian Telemedical Maritime Assistance Service (TMAS) in Rome from 2016 to 2019, supplemented by data on the estimated total at-risk seafarer population on container ships (n =13,475) over the study period.

**Outcome measures:** Distribution of injuries by anatomic location and types of diseases across seafarers' ranks and worksites. We determined the incidence rate and incidence rate ratio (IRR) with a 95% confidence interval (CI).

**Results:** The total disease rate was 25 per 1,000 seafarer-years, and the overall injury rate was 6.31 per 1,000 seafarer-years over the four years study period. Non-officers were more likely than officers to have reported gastrointestinal [IRR: 2.12 (95% CI) = 1.13 – 4.26], dermatological [IRR: 3.66 (95% CI) = 1.27 – 14.42] and musculoskeletal [IRR: 2.25 (95% CI) = 1.11–5.05] disorders onboard container ships. Deck workers were more likely than engine workers to be injured in the wrist and hand (IRR:3.25 (95% CI) = 1.19 – 10.23).

**Conclusions:** Rates of reported injury and disease were significantly higher among non-officers than officers; thus, this study suggests the need for rank-specific preventative measures. Future studies should consider risk factors for injury and disease among seafarers in order to propose further preventive measures.

**Keywords:** Epidemiology, Injury, Disease, Seafarer, Rank, Occupation

### Strengths and limitations of this study

- ✚ The first study to measure the contribution of differences in rank and job to the rates of injury and disease of seafarer's onboard container ships.
- ✚ This study measured the incidence rates and Incidence rate ratios of injury and disease by rank and worksite of seafarers based on contacts from onboard container ships to TMAS.
- ✚ The estimated at-risk seafarer population was used in the analysis due to the lack of information on the actual at-risk seafarer population.

For peer review only

## 1. INTRODUCTION

In 2015, more than 1.6 million seafarers served worldwide, of which 774,000 and 873,500 were officers and ratings, respectively<sup>1</sup>. It is estimated that nearly 65,000 deep-sea merchant ships operate worldwide, carrying more than 1.6 million sailing seafarers<sup>1,2</sup>.

In general, work onboard ships are broadly grouped by working areas, including the deck, engine, and galley<sup>3</sup>. Shipping is one of the most widespread transportation systems, and more than 88% of the world's trade utilizes it<sup>4,5</sup>. Workers at sea have high mortality, injuries, and diseases rate compared to ashore workers<sup>5</sup>. Sailing seafarers have a one in eleven chance of being injured on duty on board<sup>6</sup>, and sometimes physical injuries can be acute and a primary cause of disability. Different studies have reported higher mortality and morbidity rates onboard merchant ships when compared to the land occupation. For instance, a study conducted on the British merchant fleet reported that between 2003 to 2012, the fatal accident rate in shipping was 21 times higher than that in the general British workforce, 4.7 times higher than that in the construction industry, and 13 times higher than in manufacturing<sup>7</sup>. Fatal occupational accidents in Danish seafarers onboard ships were 11.5 times higher than Danish male workers ashore<sup>8</sup>. Moreover, seafarers working on board of British merchant ships had 23.9 times higher risk of mortality due to accidents at work than all workers in Great Britain<sup>9</sup>. The risk of death is 25 times higher for maritime transport than for air transport, according to the death accounts for every 100 km<sup>10</sup>.

Identifying the potential area of incidents and assessing the probability of the occurrence of occupational medical events may assure the availability of treatment and the development of prevention strategies to reduce the rate of diseases and/or injuries among seafarers and to improve health outcomes<sup>11-13</sup>. Unfortunately, due to the scarcity of evidence-based information on the incidence of occupational diseases and injuries onboard ships, preventive measures in the maritime environment received less attention than other working activities<sup>14</sup>. On the other hand, determinants of onboard merchant ship illnesses, injuries, disability, and fatalities, remain not adequately studied due to the not easy access of seafarer's medical data<sup>3,13,15</sup>. Previous studies have reported that non-officers have a higher risk for diseases and injuries compared to officers<sup>3,15-18</sup>, but most of these studies considered only occupational groups.

The exposure to the work-related risk of officers and non-officers working in different ship areas such as deck, engine, and galley is not similar because they attend different duties in different working hours<sup>19</sup>. For instance, workers in the engine room are exposed to work-

1  
2  
3 related risks such as noise, vibration, and heat or pollutants during their working hours<sup>19,20</sup>.  
4 In contrast, people working in the deck, as well as in the galley, are potentially exposed to  
5 different work-related risks<sup>19</sup>. Because of the different areas of activity and associated  
6 burdens, the likelihood of illnesses and the occurrence of injuries can differ. Hence, the study  
7 on the incidence rates of injury and disease by rank and worksite of seafarers would provide  
8 information for prevention strategies such as resource allocation, prioritizing training areas,  
9 improving the medicine chests on board, and access to telemedicine consultation to reduce  
10 injury and disease at the workplace.  
11  
12  
13  
14  
15

16 The present study aimed to analyze the incidence rates of reported occupational diseases and  
17 injuries among seafarers by worksite and rank groups. This work provides factual information  
18 on the rate of diseases and injuries between the worksite group as well as the rank. The  
19 results obtained can be used to prioritize occupational health risks and guide the development  
20 of preventative measures onboard container ships.  
21  
22  
23

## 24 **2. METHODS**

### 25 **2.1. Study design, data source, and collection procedure**

26  
27  
28  
29  
30 We employed a descriptive epidemiological study and received data from the Centro  
31 Internazionale Radio Medico (International Radio Medical Centre, C.I.R.M.) database. C.I.R.M.  
32 is the Italian Telemedical Maritime Assistance Service (TMAS) and represents one of the oldest  
33 and best known TMAS worldwide. C.I.R.M. operates since 1935 and has assisted more than  
34 100,000 seafarers onboard ships<sup>21</sup>. CMA CGM S.A. is a French container transport and  
35 shipping company. It is a leading shipping group globally, using 200 shipping routes between  
36 420 ports in 150 different countries. In this particular study, the data source we used was  
37 reported diseases and injuries from onboard CMA CGM container ships to TMAS, in Rome.  
38 CMA CGM S.A. shipping company made a contractual agreement with C.I.R.M. in January  
39 2016 to identify new approaches to provide high-quality telemedical assistance for seafarers.  
40 In view of this agreement, data provided for medical assistance on the company's board ships  
41 are more detailed and, therefore, can be used for a basic epidemiological analysis.  
42  
43  
44  
45  
46  
47  
48

49 Work-related diseases are diseases predominantly due to physical, chemical, and biological  
50 factors associated with merchant seafaring occupations, and they are recorded in the C.I.R.M.  
51 database according to the World Health Organization (WHO) International Classification of  
52 Disease 10<sup>th</sup> revised version (ICD 10). An occupational injury is defined as a sudden,  
53 unexpected, and unwanted forceful event due to an external cause's onboard ships. In the  
54  
55  
56  
57  
58  
59  
60

1  
2  
3 C.I.R.M. database, injuries also are recorded according to the WHO ICD 10<sup>th</sup> revised version  
4 (chapter XIX, S00-S99, and T00-T98).  
5  
6

7 The classification of both diseases and occupational injuries was made according to the prompt  
8 diagnosis and recorded medical datasets in the C.I.R.M. database. The injury and disease  
9 rates measured were based on the contacts from onboard container ships to the Italian  
10 Telemedical Maritime Assistance Service (TMAS) in Rome. Any contact for medical requests  
11 from ships to the C.I.R.M. with injuries or cases of illness with important patient data,  
12 including age, sex, job, rank, the nationality of the patient, ship flag, ship name, date of  
13 medical event that occurred, anatomic location of the injury, diagnosis, treatment provided,  
14 the patient follow-up schedule and other relevant information are registered in the database.  
15 Hence, we got access to occupational injuries and diseases with seafarers' rank and job from  
16 the TMAS database for this particular study.  
17  
18  
19  
20  
21  
22

23 An estimated total number of at-risk seafarer population was calculated by multiplying the  
24 number of vessels during the study period by the average number of crew members per  
25 vessel. As a result, large ships, including general cargo, tankers, and bulk carriers, have an  
26 average size of 20 crew members per ship<sup>3</sup>. The CMA CGM shipping company handles only  
27 container ships, with an average of 25 crew members per ship. Regarding rank distribution  
28 per ship, nine officers and sixteen non-officers serve onboard. In respect of worksite, ten deck  
29 workers, thirteen engine workers and two galleys (catering) workers are in service per vessel.  
30 The average number of the crew size, their rank as well as worksite distribution per large  
31 vessel based on the knowledge of industry norm were calculated.  
32  
33  
34  
35  
36  
37

38 The number of CMA CGM container ships contracted over four years, from January 2016 to  
39 December 31, 2019, was 539. In other words, 539 vessels represented the total number of  
40 active ships onboard in four years (January 2016 to December 31, 2019), and due to this, we  
41 determined the cumulative incidence rates. An estimated number of the total at-risk seafarer  
42 population for worksite and rank was determined by multiplying the total number of vessels  
43 over four years by occupation and rank distribution per ship. The total number of seafarers  
44 at risk was adjusted proportionally to the number of seafarers in the dataset for whom  
45 information on occupation and rank was available.  
46  
47  
48  
49

## 50 **2.2. Statistical analysis**

51

52 Descriptive statistics such as mean and standard deviation (SD) of age, frequency, and  
53 percentage of injuries by anatomic location and types of diseases were done to evaluate the  
54 distribution of reported occupational injuries and diseases in seafarers with injuries and  
55  
56  
57



diseases. Rank was stratified by officers (deck and engine officers) and non-officers (deck and engine ratings, and galley). The worksite was also categorized into three groups, including the deck, engine, and galley. Then, worksite and rank specific incidence rates (IR) were calculated by dividing the number of cases by the total at-risk seafarer population for each worksite and rank over four years. Incidence rate ratio (IRR) and 95% confidence interval (CI) were calculated to compare the injuries and diseases rates by seafarer's rank and worksite. The outcome of rates was expressed as per 1,000 seafarer-years. Seafarer-year is defined as the number of crew members per ship multiplied by the number of vessels each year. The Chi-square or Fisher's exact test was used to determine distributional differences in rank and worksite groups. A two-tailed  $P < 0.05$  was considered statistically significant. The STATA software version 15 was used for data analysis.

### 2.3. Patient and public involvement

Patients and public were not involved in the study.

## 3. RESULTS

Overall, 423 patients were assisted by the C.I.R.M. aboard container ships during the four-year study period. Of these, 338 (80%) and 85 (20%) were diseases and injuries, respectively. However, 11% (37) of the total number of patients with the disease and 8% (7) of the injured patients were unknown as to rank and worksite. The mean age (SD) of seafarers with diseases and injuries was 40.37 + 12.52 years and 38.39 + 12.88 years, respectively. Non-officers were more likely than officers to be injured (IRR = 1.75) and to have reported the disease (IRR = 1.45). Deck workers are almost 2 times more likely than engine workers to be injured ( $p < 0.004$ ) (Table 1).

**Table 1. Number of cases, seafarer-years, incidence rates, and incidence rate ratios of injury and disease by rank and worksite of seafarers from 2016 to 2019.**

| Variable        | Injury (n = 78) | Seafarer-years | Injury incidence rate (95% CI) | IRR* (95% CI)             | P-value |
|-----------------|-----------------|----------------|--------------------------------|---------------------------|---------|
| Total           | 78              | 12,365         | 6.31 (4.98 – 7.86)             | N/A                       |         |
| <b>Rank</b>     |                 |                |                                |                           |         |
| Officer         | 19              | 4,451          | 4.27 (2.57 – 6.66)             | 1                         |         |
| Non-officer     | 59              | 7,914          | 7.45 (5.68 – 9.61)             | <b>1.75</b> (1.02 – 3.10) | 0.029   |
| <b>Worksite</b> |                 |                |                                |                           |         |
| Deck            | 43              | 4,946          | 8.69 (6.29 – 11.69)            | <b>1.99</b> (1.21 – 3.34) | 0.004   |
| Engine          | 28              | 6,430          | 4.35 (2.89 – 6.29)             | 1                         |         |
| Galley          | 7               | 989            | 7.07 (2.85 – 14.53)            |                           |         |

|                 | Disease(n=301) | Seafarer-years | Disease incidence rate (95% CI) | IRR* (95% CI)             |       |
|-----------------|----------------|----------------|---------------------------------|---------------------------|-------|
| Total           | 301            | 12,000         | 25.00 (22.36 – 28.04)           | N/A                       |       |
| <b>Rank</b>     |                |                |                                 |                           |       |
| Officer         | 84             | 4320           | 19.44 (15.54 – 24.02)           | 1                         |       |
| Non-officer     | 217            | 7680           | 28.25 (24.66 – 32.21)           | <b>1.45</b> (1.12 – 1.89) | 0.003 |
| <b>Worksite</b> |                |                |                                 |                           |       |
| Deck            | 171            | 4,800          | 35.63 (30.56 – 41.26)           | <b>2.12</b> (1.65 – 2.72) | 0.001 |
| Engine          | 105            | 6,240          | 16.83 (13.78 – 20.33)           | 1                         |       |
| Galley          | 25             | 960            | 26.00 (16.92 – 38.20)           |                           |       |

Abbreviation: N/A , not applicable, \*IRR only reported the result with a significant comparison at  $p < 0.05$  for non-officer vs. officer, deck vs. engine, deck vs. galley, and engine vs. galley.

The most frequent causes of illnesses onboard ships were gastrointestinal disorders ( $n = 71$ , 21%) followed by musculoskeletal ( $n = 52$ , 15%) and cardiovascular diseases ( $n = 51$ , 15%) (Figure 1). In general, out of the 85 injuries, 29% were wrist and hand injuries, 21% were knee/lower leg injuries, 13% were head/eye injuries, 12% were lower back/lumbar spine injuries, 8% were thorax/neck injuries (Figure 2).

### Rank-specific incidence rates of occupational injuries and diseases

Gastrointestinal diseases were the most common disorders for officers (IR = 3.07 per 1000 seafarer-years) and non-officers (IR = 6.51 per 1000 seafarer-years), as presented in Table 2. The most common injuries for non-officer was wrist/hand (1.93 per 1000 seafarer-years) and knee/lower leg (1.84 per 1000 seafarer-years). The incidence rate ratio (IRR) for non-officers' versus officers was determined and reported in Table 2. As a result, non-officers were more likely than officers to have gastrointestinal (IRR = 2.12), musculoskeletal (IRR = 2.25), and dermatological (IRR = 3.66) disorders. Concerning injuries, non-officers were more likely than officers to be injured in the knee or lower leg (IRR = 4.21) (Table 2).

**Table 2. Incidence Rate of diseases and occupational injuries by the seafarer rank from 2016 to 2019 (n = 379)**

| Medical events             | Officer |      |              | Non-officer |      |             | IRR <sup>a</sup> | 95% CI       | P-value |
|----------------------------|---------|------|--------------|-------------|------|-------------|------------------|--------------|---------|
|                            | No.     | Rate | 95% CI       | No.         | Rate | 95% CI      |                  |              |         |
| <b>Disease types</b>       |         |      |              |             |      |             |                  |              |         |
| Gastrointestinal           | 13      | 3.07 | 1.64 - 5.24  | 49          | 6.51 | 4.82 - 8.59 | 2.12             | 1.13 - 4.26  | 0.011*  |
| Musculoskeletal            | 10      | 2.14 | 1.03 - 3.94  | 40          | 4.82 | 3.45 - 6.56 | 2.25             | 1.11 - 5.05  | 0.016*  |
| Cardiovascular             | 10      | 2.69 | 1.29 - 4.95  | 29          | 4.39 | 2.95 - 6.31 | 1.63             | 0.77 - 3.75  | 0.179   |
| Non-specific               | 12      | 2.86 | 1.47 - 4.99  | 20          | 2.68 | 1.64 - 4.14 | 0.94             | 0.44 - 2.10  | 0.849   |
| Respiratory                | 11      | 2.59 | 1.29 - 4.63  | 17          | 2.25 | 1.31 - 3.60 | 0.87             | 0.38 - 2.05  | 0.711   |
| Dermatological             | 4       | 0.88 | 0.24 - 2.25  | 26          | 3.22 | 2.10 - 4.71 | 3.66             | 1.27 - 14.42 | 0.007*  |
| Genitourinary              | 10      | 2.06 | 0.99 - 3.78  | 11          | 1.27 | 0.64 - 2.28 | 0.62             | 0.24 - 1.63  | 0.280   |
| Eye/Adnexa                 | 6       | 1.31 | 0.48 - 2.86  | 10          | 1.23 | 0.59 - 2.27 | 0.94             | 0.31 - 3.14  | 0.887   |
| Infectious and parasitic   | 5       | 1.26 | 0.40 - 2.94  | 4           | 0.57 | 0.15 - 1.45 | 0.45             | 0.09 - 2.09  | 0.250   |
| Ear/Mastoid                | 2       | 0.41 | 0.05 - 1.49  | 4           | 0.46 | 0.13 - 1.19 | 1.13             | 0.16 - 12.44 | 0.927   |
| Neurological <sup>b</sup>  | —       | —    | —            | 4           | 0.46 | 0.13 - 1.19 | —                | —            | N/A     |
| Mental/behavioral          | 1       | 0.21 | 0.005 - 1.14 | 3           | 0.35 | 0.07 - 1.02 | 1.69             | 0.14 - 88.59 | 0.713   |
| <b>Injury Location</b>     |         |      |              |             |      |             |                  |              |         |
| Wrist/Hand                 | 8       | 1.72 | 0.74 - 3.38  | 16          | 1.93 | 1.11 - 3.14 | 1.13             | 0.45 - 3.03  | 0.801   |
| Knee/lower leg             | 2       | 0.44 | 0.05 - 1.57  | 15          | 1.84 | 1.03 - 3.03 | 4.20             | 1.01 - 38.01 | 0.032*  |
| Head/Eye                   | 3       | 0.76 | 0.16 - 2.21  | 6           | 0.85 | 0.31 - 1.85 | 1.13             | 0.24 - 6.95  | 0.898   |
| Lower back/lumbar spine    | 3       | 0.77 | 0.16 - 2.25  | 5           | 0.73 | 0.24 - 1.69 | 0.94             | 0.18 - 6.07  | 0.911   |
| Thorax/neck                | 1       | 0.21 | 0.005 - 1.14 | 6           | 0.69 | 0.25 - 1.51 | 3.37             | 0.41 - 155   | 0.261   |
| Skin burns                 | 1       | 0.21 | 0.005 - 1.14 | 5           | 0.58 | 0.19 - 1.35 | 2.81             | 0.31 - 133   | 0.369   |
| Upper arm/shoulder         | 1       | 0.27 | 0.006 - 1.53 | 3           | 0.46 | 0.09 - 1.35 | 1.69             | 0.14 - 88.6  | 0.710   |
| Elbow/forearm <sup>b</sup> | —       | —    | —            | 4           | 0.46 | 0.13 - 1.18 | —                | —            | N/A     |

Significant at \*P-value <0.05, <sup>a</sup>IRR calculated as the rate of non-officer/rate of officer, <sup>b</sup>Dashes indicate no case or the rate or the comparison that was not performed, Abbreviation: N/A, not applicable.

### **Worksite-specific incidence rates of diseases and occupational injuries**

Table 3 summarizes the rates of diseases and injuries per seafarer worksite groups. Consequently, gastrointestinal (IR = 7.01), cardiovascular (IR = 6.06) and musculoskeletal (IR = 5.40) diseases were the most common disorders for deck workers. Musculoskeletal disorders (IR = 2.52) were the second most common diseases for engine workers. Wrist/hand injuries (IR = 2.89) were the most common injury for both deck and galley workers, while knee/lower leg injuries (IR = 1.06) were for engine workers (Table 3).

For peer review only

**Table 3. Incidence rates of diseases and occupational injuries by seafarer's worksite from 2016 to 2019 (n= 379)**

| Medical events                        | Deck |      |              | Engine |      |              | Galley |       |              |
|---------------------------------------|------|------|--------------|--------|------|--------------|--------|-------|--------------|
|                                       | No.  | Rate | 95% CI       | No.    | Rate | 95% CI       | No.    | Rate  | 95% CI       |
| <b>Disease types</b>                  |      |      |              |        |      |              |        |       |              |
| Gastrointestinal                      | 33   | 7.01 | 4.83 - 9.83  | 23     | 3.76 | 2.38 - 5.63  | 6      | 6.37  | 2.34 - 13.83 |
| Musculoskeletal                       | 28   | 5.40 | 3.59 - 7.79  | 17     | 2.52 | 1.47 - 4.04  | 5      | 4.82  | 1.56 - 11.22 |
| Cardiovascular                        | 25   | 6.06 | 3.93 - 8.94  | 10     | 1.86 | 0.89 - 3.43  | 4      | 4.85  | 1.32 - 12.38 |
| Non-specific                          | 18   | 3.86 | 2.29 - 6.09  | 13     | 2.15 | 1.14 - 3.66  | 1      | 1.07  | 0.03 - 5.96  |
| Respiratory                           | 18   | 3.82 | 2.26 - 6.02  | 9      | 1.46 | 0.67 - 2.78  | 1      | 1.06  | 0.03 - 5.89  |
| Dermatological                        | 20   | 3.96 | 2.42 - 6.11  | 6      | 0.91 | 0.34 - 1.98  | 4      | 3.96  | 1.08 - 10.09 |
| Genitourinary                         | 11   | 2.04 | 1.02 - 3.65  | 9      | 1.28 | 0.59 - 2.43  | 1      | 0.93  | 0.02 - 5.16  |
| Eye/Adnexa                            | 7    | 1.38 | 0.56 - 2.84  | 8      | 1.21 | 0.52 - 2.39  | 1      | 0.98  | 0.03 - 5.48  |
| Infectious and parasitic <sup>b</sup> | 5    | 1.13 | 0.37 - 2.64  | 4      | 0.69 | 0.19 - 1.79  | —      | —     | —            |
| Ear/Mastoid                           | 1    | 0.19 | 0.004 - 1.03 | 4      | 0.57 | 0.16 - 1.46  | 1      | 10.93 | 0.02 - 5.16  |
| Neurological                          | 2    | 0.37 | 0.05 - 1.34  | 1      | 0.14 | 0.003 - 0.79 | 1      | 0.93  | 0.02 - 5.16  |
| Mental/behavioral <sup>b</sup>        | 3    | 0.56 | 0.12 - 1.62  | 1      | 0.14 | 0.003 - 0.79 | —      | —     | —            |
| <b>Injury Location</b>                |      |      |              |        |      |              |        |       |              |
| Wrist/Hand                            | 15   | 2.89 | 1.62 - 4.77  | 6      | 0.89 | 0.33 - 1.94  | 3      | 2.89  | 0.59 - 8.45  |
| Knee/lower leg <sup>b</sup>           | 10   | 1.96 | 0.94 - 3.61  | 7      | 1.06 | 0.43 - 2.18  | —      | —     | —            |
| Head/Eye                              | 6    | 1.36 | 0.49 - 2.96  | 2      | 0.35 | 0.04 - 1.26  | 1      | 1.13  | 0.03 - 6.30  |
| Lower back/lumbar spine               | 4    | 0.93 | 0.25-2.37    | 3      | 0.54 | 0.11 - 1.56  | 1      | 1.16  | 0.03 - 6.44  |
| Thorax/neck <sup>b</sup>              | 3    | 0.56 | 0.11 - 1.63  | 4      | 0.57 | 0.16 - 1.46  | —      | —     | —            |
| Skin burns                            | 1    | 0.19 | 0.004 - 1.03 | 4      | 0.57 | 0.16 - 1.46  | 1      | 0.93  | 0.02 - 5.16  |
| Upper arm/shoulder <sup>b</sup>       | 1    | 0.25 | 0.006 - 1.38 | 2      | 0.38 | 0.05 - 1.37  | —      | —     | —            |
| Elbow/forearm <sup>b</sup>            | 3    | 0.56 | 0.11-1.63    | —      | —    | —            | 1      | 0.93  | 0.02 - 5.16  |

<sup>b</sup>Dashes indicate no case or the rate that was not performed.

1  
2  
3 The IRRs for deck workers versus engine workers', deck workers versus galley workers', and  
4 engine workers versus galley workers were calculated and presented in Table 4. As a result,  
5 deck workers were more likely than engine workers to have reported gastrointestinal (IRR =  
6 1.86), cardiovascular (IRR = 3.26), dermatological (IRR = 4.35), respiratory (IRR = 2.62),  
7 and musculoskeletal (IRR = 2.14) disorders. Also, deck workers were more likely than engine  
8 workers to be injured in the wrist and hand (IRR = 3.25)(Table 4).  
9  
10  
11  
12  
13  
14  
15  
16  
17  
18  
19  
20  
21  
22  
23  
24  
25  
26  
27  
28  
29  
30  
31  
32  
33  
34  
35  
36  
37  
38  
39  
40  
41  
42  
43  
44  
45  
46  
47  
48  
49  
50  
51  
52  
53  
54  
55  
56  
57  
58  
59  
60

For peer review only

**Table 4. Incidence rate ratios (IRR) and 95% confidence intervals (95% CI) of diseases and occupational injuries stratified by seafarers' worksite from 2016 to 2019 (n = 379)**

| Medical events                        | Deck vs. Engine |              |         | Deck vs. Galley |              |         | Engine vs. Galley |              |         |
|---------------------------------------|-----------------|--------------|---------|-----------------|--------------|---------|-------------------|--------------|---------|
|                                       | IRR             | 95% CI       | p-value | IRR             | 95% CI       | P-value | IRR               | 95% CI       | P-value |
| <b>Disease types</b>                  |                 |              |         |                 |              |         |                   |              |         |
| Gastrointestinal                      | 1.86            | 1.06 – 3.33  | 0.021*  | 1.09            | 0.45 – 3.21  | 0.869   | 0.59              | 0.23 – 1.77  | 0.263   |
| Musculoskeletal                       | 2.14            | 1.13 – 4.17  | 0.013*  | 1.12            | 0.43 – 3.72  | 0.857   | 0.52              | 0.19 – 1.81  | 0.224   |
| Cardiovascular                        | 3.26            | 1.51 – 7.58  | 0.001*  | 1.25            | 0.43 – 4.94  | 0.721   | 0.39              | 0.11 – 1.68  | 0.135   |
| Non-specific                          | 1.80            | 0.83 – 3.99  | 0.108   | 3.59            | 0.57 – 149   | 0.182   | 1.99              | 0.30 – 84.9  | 0.561   |
| Respiratory                           | 2.62            | 1.11 – 6.57  | 0.017*  | 3.59            | 0.56 – 149   | 0.182   | 1.38              | 0.19 – 60.7  | 0.846   |
| Dermatological                        | 4.35            | 1.68 – 13.18 | 0.001*  | 1.00            | 0.34 – 4.03  | 1.044   | 0.23              | 0.05 – 1.11  | 0.053   |
| Genitourinary                         | 1.59            | 0.59 – 4.34  | 0.311   | 2.20            | 0.31 – 94    | 0.494   | 1.38              | 0.19 – 60.68 | 0.846   |
| Eye/Adnexa                            | 1.14            | 0.35 – 3.59  | 0.803   | 1.40            | 0.18 – 63    | 0.837   | 1.23              | 0.17 – 55    | 0.933   |
| Infectious and parasitic <sup>b</sup> | 1.63            | 0.35 – 8.19  | 0.486   | —               | —            | N/A     | —                 | —            | N/A     |
| Ear/Mastoid                           | 0.32            | 0.006 – 3.28 | 0.337   | 0.20            | 0.002 – 15.6 | 0.333   | 0.61              | 0.06 – 30.30 | 0.646   |
| Neurological                          | 2.60            | 0.14 – 153   | 0.485   | 0.40            | 0.02 – 23.5  | 0.495   | 0.15              | 0.001 – 12   | 0.267   |
| Mental/behavioral <sup>b</sup>        | 3.90            | 0.31 – 204   | 0.257   | —               | —            | N/A     | —                 | —            | N/A     |
| <b>Injury Location</b>                |                 |              |         |                 |              |         |                   |              |         |
| Wrist/Hand                            | 3.25            | 1.19 – 10.23 | 0.012*  | 1.00            | 0.28 – 5.39  | 1.050   | 0.31              | 0.06 – 1.90  | 0.130   |
| Knee/lower leg <sup>b</sup>           | 1.86            | 0.64 – 5.75  | 0.216   | —               | —            | N/A     | —                 | —            | N/A     |
| Head/Eye                              | 3.90            | 0.69 – 39.50 | 0.089   | 1.20            | 0.15 – 55    | 0.949   | 0.31              | 0.02 – 18    | 0.398   |
| Lower back/lumbar spine               | 1.73            | 0.29 – 11.80 | 0.494   | 0.80            | 0.08 – 39.7  | 0.794   | 0.46              | 0.04 – 24    | 0.524   |
| Thorax/neck <sup>b</sup>              | 0.98            | 0.14 – 5.76  | 0.987   | —               | —            | N/A     | —                 | —            | N/A     |
| Skin burns                            | 0.33            | 0.01 – 3.28  | 0.337   | 0.20            | 0.003 – 15.7 | 0.333   | 0.62              | 0.06 – 30.30 | 0.646   |
| Upper arm/shoulder <sup>b</sup>       | 0.65            | 0.01 – 12.50 | 0.778   | —               | —            | N/A     | —                 | —            | N/A     |
| Elbow/forearm <sup>b</sup>            | —               | —            | N/A     | 0.60            | 0.05 – 31.5  | 0.649   | —                 | —            | N/A     |

Significant at \*p-value <0.05, <sup>b</sup>Dashes indicate the comparison that was not performed, Abbreviation: N/A, not applicable.

#### 4. DISCUSSION

This descriptive epidemiological study was mainly designed to quantify the incidence rates of reported injuries and diseases among seafarers by worksite and rank groups. We have found that the rates of overall reported diseases were four times higher than the corresponding total reported injuries rates across all worksites. A similar finding was reported from a study conducted in the USA<sup>15</sup>, which reported 2 to 3 times total illnesses higher in the worksites than overall injuries. The overall reported disease rate was 25 per 1,000 seafarer-year during the study period. The disease rate for non-officers and officers were significantly differed [IRR: 1.45 (95% CI) = 1.12 – 1.89]. This study reported that the most common causes of illnesses on board were gastrointestinal (21%), musculoskeletal (15%), and cardiovascular disorders (15%). Similar findings were reported in a Japanese study<sup>22</sup>, which has shown that gastrointestinal (35.5%), musculoskeletal (19.6%), and cardiovascular diseases (11.6%) were the diseases more often occurring onboard ships. Our findings are not consistent with the study conducted in the USA<sup>3</sup>, which reported that dental (26%), respiratory (19%), and dermatological (14%) disorders were in the order the illnesses occurring most often among sailing seafarers.

The majority of gastrointestinal (63%) cases were gastroesophageal reflux (GERD), esophagitis, ulcers, gastritis, hernia, and appendicitis. Our work has demonstrated that non-officers were more likely than officers to have gastrointestinal (IRR = 2.12), musculoskeletal (IRR = 2.25), and dermatological (IRR = 3.66) disorders. This study also revealed that deck workers were more likely than engine workers to have gastrointestinal (IRR = 1.86), dermatological (IRR = 4.35), respiratory (IRR = 2.62), and musculoskeletal (IRR = 2.14) disorders. These might be due to work-related stress because maritime officers, including the captain, have high-level responsibilities such as navigation, planning, organization of loading and unloading operations, and ship controls<sup>19,23</sup>. Non-officers are involved in other tasks occurring during a voyage and their work is physically more demanding and stressful than officers. In general, seafarers have high work-related stressors when compared to ashore workers<sup>20</sup> because their work is characterized by long working hours, often time-pressure, prolonged isolation from family, and hectic activity. Various studies have reported that work-related stress has long been considered a contributing factor in the development of musculoskeletal problems<sup>24</sup> and gastrointestinal disorders<sup>25</sup>. Similarly, as for dermatological disorders, it might result in skin exposure to risk factors in the workplace. Seafaring is a risky activity characterized by exposure to different skin risk factors such as seawater, humidity, solar radiation, and others<sup>26,27</sup>. Deck crews are frequently engaged in maintenance, repair,



1  
2  
3 loading, painting activities, and exposure to chemicals, UV radiation, and other skin risk  
4 factors<sup>28,29</sup>. This study also reported the same rate of dermatological disorders for the deck  
5 (IR = 3.96) and galley (IR = 3.96) workers. However, this could be due to the small number  
6 of cases among galley workers, and even the estimated non-cases of galley workers are not  
7 comparable in number to deck workers' non-cases. Consequently, 95% of the confidence  
8 interval was wider for the case rate among the galley workers. The IRR results in the  
9 comparison made between the workers on deck and in the galley were also not statistically  
10 significant ( $p = 1.044$ ) on this matter. Further studies are needed to measure the effect of  
11 differences in the workplace of deck and galley workers on dermatological disease rates.

12  
13  
14  
15  
16  
17 Angina pectoris (39% of all CVD diagnoses) was the most frequently reported cardiovascular  
18 disorders in this study. As for cardiovascular disorders, it could be related to lifestyle,  
19 especially a high-fat diet, drinking, smoking and physical inactivity. A study conducted on the  
20 board of Italian flagship (2019) reported that more than 40% and 10% of seafarers were  
21 overweight and obese, respectively<sup>30</sup>. This finding suggests that in seafarer's CVD risk factors  
22 are higher compared to ashore workers. We found that cardiovascular (IR = 6.06) disorders  
23 were the second most common diseases for deck workers and deck workers were also more  
24 likely than engine worker to have reported cardiovascular diseases (IRR = 3.26). This might  
25 be due to work-related stress because deck workers have high work-related stress due to  
26 sleep interruption, high job demands, night shift work, and intense activity than engine  
27 workers. A study reported that work related stress was a risk factor for cardiovascular  
28 diseases<sup>31</sup>. Long working hours are contributing factors to work-related stress, and it is logical  
29 to expect an association between long hours and cardiovascular disorders<sup>32,33</sup>. Studies have  
30 also shown that night shift work had adverse effects on health and risk factors for the  
31 development of chronic diseases such as cardiovascular diseases<sup>19,34,35</sup>. The relationship  
32 between stress and coronary heart disease are considered to be linked to multiple and  
33 protracted increases in heart rate and blood pressure resulting from neuroendocrine  
34 activation<sup>36-39</sup>. Other studies have reported that work-related stress can increase the  
35 cardiovascular risk of workers<sup>40-42</sup>. On the other hand, cardiovascular diseases and metabolic  
36 disorders are stress-related diseases<sup>43</sup>.

37  
38  
39  
40  
41  
42  
43  
44  
45  
46  
47  
48  
49 The total reported injury rate was 6.31 per 1,000 seafarer-year over four years' study period.  
50 The injury rate for non-officers and officers were significantly differed [IRR: 1.75 (95% CI) =  
51 1.75 – 3.10]. Nearly 30% of injuries occurred in the wrist and hand, followed by the knee and  
52 lower leg (21%). Our results agree with the study conducted in the Danish-flagged merchant  
53 fleet<sup>18</sup>, which reported 36% and 18% of upper and lower limb injuries, respectively. Moreover,  
54  
55  
56  
57

1  
2  
3 this study revealed that non-officers were more likely than officers to be injured (IRR = 1.75).  
4 This finding was in agreement with the previous studies<sup>17,3,44</sup>. Non-officer work is  
5 characterized by mooring, cleaning the ship, repairing broken cables and ropes, operating  
6 machinery such as cranes and drilling towers, and steering the ship at sea<sup>20,23</sup>. The non-officer  
7 work is also physically challenging<sup>19,20,23</sup> and must be carried out regardless of weather  
8 conditions. This could explain why non-officers have a higher rate of injuries than officers.  
9  
10

11  
12  
13 The present study has shown that the deck workers had higher rates of overall reported  
14 injuries (IR = 8.69) compared to the engine (IR = 4.35) workers. These results are consistent  
15 with those of the study conducted in the USA<sup>15</sup>. We also found the injury rate for deck workers  
16 and engine workers were significantly differed [IRR: 1.99 (95% CI) =1.21 – 3.34]. Similarly,  
17 deck workers were more likely than engine workers to be injured in the wrist and hand (IRR  
18 = 3.25), as shown in Table 4. A study conducted in Danish Fleet seafarers<sup>44</sup> reported that  
19 deck workers had a relatively low risk for injuries compared to machine (engine) workers.  
20 The difference could be due to methodological differences. The study on seafarers in the  
21 Danish fleet was a questionnaire-based survey. Furthermore, denominators, used to  
22 determine incidence rates and incidence rate ratios in the Danish fleet, were not consistent  
23 with our study. Deck workers, particularly deck ratings, perform physical works such as  
24 mooring and unmooring the ship, loading, and unloading cargo<sup>23</sup>. Moreover, deck workers  
25 have a shorter sleeping time and sleep interruptions more often than engine workers because  
26 they are engaged in the surveillance system with frequent irregular operations. These include  
27 monitoring the bridge or gangway, acting as lookouts on the bridge, or carrying out repairs  
28 and maintenance work in the deck area<sup>19,20,23</sup>. Hence, night shift work, long working hours,  
29 short average sleep time, and physical stress are important factors contributing to the high  
30 rates of injuries/accidents at sea<sup>10,19,45,46</sup>.  
31  
32  
33  
34  
35  
36  
37  
38  
39  
40

### 41 **Strengths and limitations**

42  
43 This study measured the incidence rates of reported injury and disease to TMAS for container  
44 ships. Most of the previous studies on diseases and injuries among seafarers were focused on  
45 the number of cases. As far as we know, this study is the first study to measure the  
46 contribution of differences in rank and job to the rates of injury and disease of seafarers  
47 onboard container ships. Limitations of this study are: 1). We used an estimated average  
48 number of seafarers per ship in the analysis, although we took into account different  
49 assumptions, including the number of vessels, ships active at sea, number of crew members  
50 per ship, and the length of stay of seafarers on board for the accuracy of the estimate.  
51 Consequently, the incidence rate may be underestimated or overestimated. 2). Data from  
52  
53  
54  
55  
56  
57  
58  
59  
60

1  
2  
3 patients with injuries and cases of disease contained descriptions such as age and gender,  
4 but we had no descriptions of these data on the total at-risk seafarer population. Hence, we  
5 have not determined the rates and incidence rate ratios of the diseases and injuries by  
6 seafarers' age and sex. 3). Patient data on both injury and diagnosis were compiled according  
7 to the revised WHO ICD10 codes and the injury's anatomic location in the database, but not  
8 on mechanisms of injury or potential physical hazards related to injured cases. As a result,  
9 we have not stratified injuries by mechanisms of injury or occupational hazards to highlight  
10 priority areas and recommend preventative measures. 4). We did not have descriptions of  
11 data types such as socio-demographic variables and another exposure status of the total  
12 seafarer population at risk. In this respect, we have not determined the risk factors for injury  
13 and disease to propose further prevention strategies. Furthermore, this study is a  
14 retrospective study and limited to the variables available in the dataset. Finally, our study is  
15 limited to container ships and does not represent other types of ships at sea. Hence, the  
16 results do not reflect seafarers working on other types of ships.

## 24 25 **CONCLUSION**

26  
27 The results of this study were based on the medical events (diseases and occupational  
28 injuries) of seafarers while working on board container ships. Non-officers had significantly  
29 higher rates of reported gastrointestinal, musculoskeletal, and dermatological disorders  
30 compared to officers. Also, non-officers were more likely than officers to be injured in the  
31 knee and lower leg. Deck workers had significantly higher rates for dermatological,  
32 cardiovascular, musculoskeletal, respiratory, and gastrointestinal disorders when compared  
33 to engine workers. Deck workers were more likely than engine workers to be injured in the  
34 wrist and hand. In general, the total reported injury and disease rates for non-officers were  
35 significantly higher compared to officers. The same is true for deck workers compared to  
36 engine workers. Hence, this study suggests the need for rank and work site-specific  
37 prevention strategies to reduce injury and disease rates at the workplace. Future studies  
38 should consider the risk factors for injury and disease among seafarers in order to propose  
39 further preventive measures.

## 46 47 **Contributors**

48  
49 GGS.: conceived and designed the study, performed analysis, methodology, interpreted the  
50 data and results, and drafted the initial manuscript. MD: extracted data and assisted with  
51 the preparation of the manuscript. GB.: contributed to the data collection. MAS: interpreted

1  
2  
3 the data and involved in the preparation of the manuscript. FA: guided, edited, reviewed, and  
4 approved the study. All authors approved the final version of the manuscript.  
5  
6  
7

8 **Funding:** This work was supported by the International Transport Workers Federation (ITF)  
9 Trust, London, UK, under grant number 558 to C.I.R.M. Institutional funding of the University of  
10 Camerino, Italy, supported Ph.D. bursaries to GGS and GB.  
11  
12  
13

#### 14 **Conflict of interests**

15  
16 The authors declared that they have no conflict of interest.  
17  
18  
19  
20  
21  
22  
23  
24  
25

#### 26 **Ethical approval**

27  
28 The study has been reviewed and approved by the Scientific/Ethics Committee of the C.I.R.M.  
29 Foundation.  
30  
31

32 **Patient consent for publication:** Not required.  
33

34 **Data availability statement:** No additional data available  
35

#### 36 **ORCID iD**

37  
38  
39 Getu Gamo Sagaro <https://orcid.org/0000-0002-5983-0266>  
40

41  
42 Gopi Battenini <https://orcid.org/0000-0003-0603-2356>  
43

44  
45 Francesco Amenta <https://orcid.org/0000-0002-0555-1034>  
46  
47  
48  
49  
50  
51  
52  
53  
54  
55  
56  
57  
58  
59  
60

**REFERENCES**

1. BIMCO, ICS. "Manpower Report-The global supply and demand for seafarers. *Exec Summ*. Published online 2015:6. <http://www.ics-shipping.org/docs/default-source/resources/safety-security-and-operations/manpower-report-2015-executive-summary.pdf?sfvrsn=16>
2. Telemedicine: revolutionising healthcare for seafarers. Accessed August 10, 2019. <https://www.ship-technology.com/features/featuretelemedicine-revolutionising-healthcare-for-seafarers-5673476/>
3. Lefkowitz RY, Redlich CA, Mph MDS. Injury , illness , and disability risk in American seafarers. *Am J Ind Med*. 2018;61:120-129. doi:10.1002/ajim.22802
4. IMO (International Maritime Organization). Accessed October 12, 2019. <https://business.un.org/en/entities/13>
5. Center for Maritime Safety and Health Studies. Published online 2019. Accessed October 12, 2019. [https://www.cdc.gov/niosh/programs/cmshs/port\\_operations.html](https://www.cdc.gov/niosh/programs/cmshs/port_operations.html)
6. Mulić, Rosanda, Pero Vidan and RB. Comparative analysis of medical assistance to seafarers in the world and the republic of Croatia. *15th Int Conf Transp Sci*. Published online 2012:1-8. [https://bib.irb.hr/datoteka/587264.Mulic\\_Vidan\\_Bosnjak.pdf](https://bib.irb.hr/datoteka/587264.Mulic_Vidan_Bosnjak.pdf)
7. Roberts SE, Nielsen D, Kotłowski A, Jaremin B. Fatal accidents and injuries among merchant seafarers worldwide. *Occup Med (Chic Ill)*. 2014;64:259-266. doi:10.1093/occmed/kqu017
8. Borch DF, Hansen HL, Burr H, Jepsen JR. Surveillance of maritime deaths on board Danish merchant ships , 1986 – 2009. Published online 2012:7-16.
9. Roberts SE, Hansen HL. An analysis of the causes of mortality among seafarers in the British merchant fleet (1986-1995) and recommendations for their reduction. *Occup Med (Chic Ill)*. 2002;52:195-202. doi:10.1093/occmed/52.4.195
10. Berg HP. Human Factors and Safety Culture in Maritime Safety ( revised ). *Mar Navig Saf Sea Transp STCW, Marit Educ Train (MET), Hum Resour Crew Manning, Marit Policy, Logist Econ Matters*. 2013;7(3):107-115. doi:10.12716/1001.07.03.04
11. Carter T. Mapping the knowledge base for maritime health: 1 historical perspective.

- 1  
2  
3 *Int Marit Health*. 2011;62(4):210-216.  
4  
5  
6 12. Carter T. Mapping the knowledge base for maritime health: 2. a framework for  
7 analysis. *Int Marit Health*. 2011;62(4):217-223. Accessed October 12, 2019.  
8 <http://www.ncbi.nlm.nih.gov/pubmed/22544496>  
9  
10  
11 13. Carter T. Mapping the knowledge base for maritime health: 3 illness and injury in  
12 seafarers. *Int Marit Health*. 2011;62(4):224-240.  
13  
14  
15 14. Carter T. Mapping the knowledge base for maritime health: 4 safety and performance  
16 at sea. *Int Marit Health*. 2011;62(4):236-244. Accessed October 12, 2019.  
17 <http://www.ncbi.nlm.nih.gov/pubmed/22544498>  
18  
19  
20 15. Lefkowitz RY, Slade MD, Redlich CA. "Injury, illness, and work restriction in merchant  
21 seafarers." *Am J Ind Med*. 2015;58(6):688-696. doi:10.1002/ajim.22459  
22  
23  
24 16. Hannerz H. Hospitalisations among seafarers on merchant ships. *Occup Env Med*.  
25 2005;62:145-150. doi:10.1136/oem.2004.014779  
26  
27  
28 17. Kaerlev L, Jensen A, Nielsen PS, Olsen J, Hannerz H, Tüchsen F. Hospital contacts for  
29 injuries and musculoskeletal diseases among seamen and fishermen : A population-  
30 based cohort study. *BioMed Cent*. 2008;9:1-9. doi:10.1186/1471-2474-9-8  
31  
32  
33 18. Herttua K, Gerdøe S, Vork JC, Nielsen JB. Age and nationality in relation to injuries  
34 at sea among officers and non- - officers : a study based on contacts from ships to  
35 Telemedical Assistance Service in Denmark. *BMJ Open*. 2019;9:1-7.  
36 doi:10.1136/bmjopen-2019-034502  
37  
38  
39  
40 19. Oldenburg M, Jensen HJ. Stress and strain among seafarers related to the  
41 occupational groups. *Int J Environ Res Public Health*. 2019;16(7).  
42 doi:10.3390/ijerph16071153  
43  
44  
45 20. Oldenburg M, Jensen HJ, Latza U, Baur X. Seafaring stressors aboard merchant and  
46 passenger ships. *Int J Public Health*. 2009;54(2):96-105. doi:10.1007/s00038-009-  
47 7067-z  
48  
49  
50  
51 21. Mahdi SS, Amenta F. Eighty years of CIRM. A journey of commitment and dedication  
52 in providing maritime medical assistance. *Int Marit Health*. 2016;67(4):187-195.  
53 doi:10.5603/imh.2016.0036  
54  
55  
56  
57  
58  
59  
60

- 1
  - 2
  - 3
  - 4
  - 5
  - 6
  - 7
  - 8
  - 9
  - 10
  - 11
  - 12
  - 13
  - 14
  - 15
  - 16
  - 17
  - 18
  - 19
  - 20
  - 21
  - 22
  - 23
  - 24
  - 25
  - 26
  - 27
  - 28
  - 29
  - 30
  - 31
  - 32
  - 33
  - 34
  - 35
  - 36
  - 37
  - 38
  - 39
  - 40
  - 41
  - 42
  - 43
  - 44
  - 45
  - 46
  - 47
  - 48
  - 49
  - 50
  - 51
  - 52
  - 53
  - 54
  - 55
  - 56
  - 57
  - 58
  - 59
  - 60
22. Ehara M, Muramatsu S, Sano Y, Takeda S, Hisamune S. The tendency of diseases among seamen during the last fifteen years in Japan. *Ind Health*. 2006;44(1):155-160. doi:10.2486/indhealth.44.155
23. STCW. International Convention on Standards of Training, Certification and Watchkeeping for Seafarers. IMO. Published 1995. Accessed May 2, 2020. <http://www.imo.org/en/OurWork/humanelement/trainingcertification/pages/stcw-convention.aspx>
24. Leino P. Symptoms of stress predict musculoskeletal disorders. *J Epidemiol Community Health*. 1989;43(3):293-300. doi:10.1136/jech.43.3.293
25. Lim SK, Yoo SJ, Koo DL, et al. Stress and sleep quality in doctors working on-call shifts are associated with functional gastrointestinal disorders. *World J Gastroenterol*. 2017;23(18):3330-3337. doi:10.3748/wjg.v23.i18.3330
26. Caruso G. "Do seafarers have sunshine." 8th International Symposium on Maritime Health (ISMH) Book of abstracts. Published online 2005.
27. Laraqui O, Manar N, Laraqui S, et al. Prevalence of skin diseases amongst Moroccan fishermen. *Int Marit Health*. 2018;69(1):22-27. doi:10.5603/IMH.2018.0004
28. Meyer G, Siekmann H, Feister U, Felten C HJ. Measurement of sunlight exposure in seafaring [Ermittlung der natürlichen UV-Strahlenexposition in der Seeschifffahrt]. 50. Jahrestagung der Deutschen Gesellschaft für Arbeitsmedizin und Umweltmedizin (DGAUM). *Eur J Dermatol*. Published online 2010:434-436.
29. Oldenburg M, Kuechmeister B, Ohnemus U, Baur X, Moll I. Extrinsic skin ageing symptoms in seafarers subject to high work-related exposure to UV radiation. *Eur J Dermatology*. 2013;23(5):663-670. doi:10.1684/ejd.2013.2142
30. Nittari G, Tomassoni D, Di Canio M, et al. Overweight among seafarers working on board merchant ships. *BMC Public Health*. 2019;19(1):1-8. doi:10.1186/s12889-018-6377-6
31. Kivimäki M, Kawachi I. Work Stress as a Risk Factor for Cardiovascular Disease. *Curr Cardiol Rep*. 2015;17(9). doi:10.1007/s11886-015-0630-8
32. Virtanen M, Heikkilä K, Jokela M, et al. Long working hours and coronary heart disease: A systematic review and meta-analysis. *Am J Epidemiol*. 2012;176(7):586-

- 1  
2  
3 596. doi:10.1093/aje/kws139  
4  
5  
6 33. Shin K, Chung Y, Kwon ÆY. The Effect of Long Working Hours on Cerebrovascular and  
7 Cardiovascular Disease ; A Case-Crossover Study. 2017;761(December 2016):753-  
8 761. doi:10.1002/ajim.22688.  
9  
10  
11 34. Boivin DB, Boudreau P. Impacts of shift work on sleep and circadian rhythms. *Pathol*  
12 *Biol.* 2014;62(5):292-301. doi:10.1016/j.patbio.2014.08.001  
13  
14  
15 35. Hermansson J, Hallqvist J, Karlsson B, Knutsson A, Gådin KG. Shift work, parental  
16 cardiovascular disease and myocardial infarction in males. *Occup Med (Chic Ill)*.  
17 2018;68(2):120-125. doi:10.1093/occmed/kqy008  
18  
19  
20 36. Steptoe A, Kivimäki M. Stress and cardiovascular disease. *Nat Rev Cardiol*.  
21 2012;9(6):360-370. doi:10.1038/nrcardio.2012.45  
22  
23  
24 37. Li J, Zhang M, Loerbroks A, Angerer P, Siegrist J. Work stress and the risk of  
25 recurrent coronary heart disease events: A systematic review and meta-analysis. *Int*  
26 *J Occup Med Environ Health*. 2015;28(1):8-19. doi:10.2478/s13382-014-0303-7  
27  
28  
29 38. Dragano N, Siegrist J, Nyberg ST, et al. Effort-Reward Imbalance at Work and  
30 Incident Coronary Heart Disease: A Multicohort Study of 90,164 Individuals.  
31 *Epidemiology*. 2017;28(4):619-626. doi:10.1097/EDE.0000000000000666  
32  
33  
34  
35 39. Sara JD, Prasad M, Eleid MF, Zhang M, Jay Widmer R, Lerman A. Association between  
36 work-related stress and coronary heart disease: A review of prospective studies  
37 through the job strain, effort-reward balance, and organizational justice models. *J Am*  
38 *Heart Assoc*. 2018;7(9):1-15. doi:10.1161/JAHA.117.008073  
39  
40  
41  
42 40. Kivimäki M, Virtanen M, Elovainio M, Kouvonen A, Väänänen A, Vahtera J. Work  
43 stress in the etiology of coronary heart disease - A meta-analysis. *Scand J Work*  
44 *Environ Heal*. 2006;32(6):431-442. doi:10.5271/sjweh.1049  
45  
46  
47 41. Jaremin B KE. Myocardial infarction (MI) at the work-site among Polish seafarers. The  
48 risk and the impact of occupational factors. *Int Marit Heal*. 2003;54(1-4):26-39.  
49  
50  
51 42. Filikowski J, Rzepliak M, Renke W, Winnicka A SD. Selected risk factors of ischemic  
52 heart disease in Polish seafarers. Preliminary report. *Int Marit Heal*. 2003;54(1-4):40-  
53 46.  
54  
55  
56  
57  
58  
59  
60



- 1  
2  
3 43. Siegrist J, Rodel A. Work stress and health risk behavior. *Scand J Work Env Heal*.  
4 2006;32(6):473-481. doi:10.5271/sjweh.1052  
5  
6  
7 44. Jensen OC, Sørensen JF, Canals ML, Hu YP, Nikolic N TM. Incidence of self-reported  
8 occupational injuries in seafaring — an international study. *Occup Med*.  
9 2004;54(8):548-555. doi:10.1093/occmed/kqh090  
10  
11  
12 45. Harrington JM. Health effects of shift work and extended hours of work. *Occup*  
13 *Environ Med*. 2001;58(1):68-72.  
14  
15  
16 46. Spurgeon A, Harrington JM, Cooper CL. Health and safety problems associated with  
17 long working hours: A review of the current position. *Occup Environ Med*.  
18 1997;54(6):367-375. doi:10.1136/oem.54.6.367  
19  
20  
21  
22  
23  
24  
25

### **Legends of the figures**

26  
27  
28 Figure 1. Diagnosis of seafarers according to WHO ICD 10<sup>th</sup> category from 2016 to 2019 (n =  
29 338)  
30  
31

32 Figure 2: Distribution of injured body parts of seafarers with injuries from 2016 to  
33 2019 (n = 85)  
34  
35  
36  
37  
38  
39  
40  
41  
42  
43  
44  
45  
46  
47  
48  
49  
50  
51  
52  
53  
54  
55  
56  
57  
58  
59  
60

1  
2  
3  
4  
5  
6  
7  
8  
9  
10  
11  
12  
13  
14  
15  
16  
17  
18  
19  
20  
21  
22  
23  
24  
25  
26  
27  
28  
29  
30  
31  
32  
33  
34  
35  
36  
37  
38  
39  
40  
41  
42  
43  
44  
45  
46  
47  
48  
49  
50  
51  
52  
53  
54  
55  
56  
57  
58  
59  
60



Figure 1

view only



Figure 2

**STROBE 2007 (v4) Statement—Checklist of items that should be included in reports of *cohort studies***

| Section/Topic                | Item # | Recommendation                                                                                                                                                                       | Reported on page # |
|------------------------------|--------|--------------------------------------------------------------------------------------------------------------------------------------------------------------------------------------|--------------------|
| <b>Title and abstract</b>    | 1      | (a) Indicate the study's design with a commonly used term in the title or the abstract                                                                                               | 1                  |
|                              |        | (b) Provide in the abstract an informative and balanced summary of what was done and what was found                                                                                  | 2                  |
| <b>Introduction</b>          |        |                                                                                                                                                                                      |                    |
| Background/rationale         | 2      | Explain the scientific background and rationale for the investigation being reported                                                                                                 | 4                  |
| Objectives                   | 3      | State specific objectives, including any prespecified hypotheses                                                                                                                     | 5                  |
| <b>Methods</b>               |        |                                                                                                                                                                                      |                    |
| Study design                 | 4      | Present key elements of study design early in the paper                                                                                                                              | 5                  |
| Setting                      | 5      | Describe the setting, locations, and relevant dates, including periods of recruitment, exposure, follow-up, and data collection                                                      | 5                  |
| Participants                 | 6      | (a) Give the eligibility criteria, and the sources and methods of selection of participants. Describe methods of follow-up                                                           | 6 & 7              |
|                              |        | (b) For matched studies, give matching criteria and number of exposed and unexposed                                                                                                  |                    |
| Variables                    | 7      | Clearly define all outcomes, exposures, predictors, potential confounders, and effect modifiers. Give diagnostic criteria, if applicable                                             |                    |
| Data sources/<br>measurement | 8*     | For each variable of interest, give sources of data and details of methods of assessment (measurement). Describe comparability of assessment methods if there is more than one group | 5 & 6              |
| Bias                         | 9      | Describe any efforts to address potential sources of bias                                                                                                                            | 6                  |
| Study size                   | 10     | Explain how the study size was arrived at                                                                                                                                            | 6                  |
| Quantitative variables       | 11     | Explain how quantitative variables were handled in the analyses. If applicable, describe which groupings were chosen and why                                                         | 6                  |
| Statistical methods          | 12     | (a) Describe all statistical methods, including those used to control for confounding                                                                                                | 6 & 7              |
|                              |        | (b) Describe any methods used to examine subgroups and interactions                                                                                                                  |                    |
|                              |        | (c) Explain how missing data were addressed                                                                                                                                          | 6                  |
|                              |        | (d) If applicable, explain how loss to follow-up was addressed                                                                                                                       |                    |
|                              |        | (e) Describe any sensitivity analyses                                                                                                                                                |                    |
| <b>Results</b>               |        |                                                                                                                                                                                      |                    |

|                          |     |                                                                                                                                                                                                                                                                                                                                                                                                               |                 |
|--------------------------|-----|---------------------------------------------------------------------------------------------------------------------------------------------------------------------------------------------------------------------------------------------------------------------------------------------------------------------------------------------------------------------------------------------------------------|-----------------|
| Participants             | 13* | (a) Report numbers of individuals at each stage of study—eg numbers potentially eligible, examined for eligibility, confirmed eligible, included in the study, completing follow-up, and analysed<br>(b) Give reasons for non-participation at each stage<br>(c) Consider use of a flow diagram                                                                                                               |                 |
| Descriptive data         | 14* | (a) Give characteristics of study participants (eg demographic, clinical, social) and information on exposures and potential confounders<br>(b) Indicate number of participants with missing data for each variable of interest<br>(c) Summarise follow-up time (eg, average and total amount)                                                                                                                | 5&6<br>6        |
| Outcome data             | 15* | Report numbers of outcome events or summary measures over time                                                                                                                                                                                                                                                                                                                                                | 6               |
| Main results             | 16  | (a) Give unadjusted estimates and, if applicable, confounder-adjusted estimates and their precision (eg, 95% confidence interval). Make clear which confounders were adjusted for and why they were included<br>(b) Report category boundaries when continuous variables were categorized<br>(c) If relevant, consider translating estimates of relative risk into absolute risk for a meaningful time period | 7, 8, 9,11 & 13 |
| Other analyses           | 17  | Report other analyses done—eg analyses of subgroups and interactions, and sensitivity analyses                                                                                                                                                                                                                                                                                                                |                 |
| <b>Discussion</b>        |     |                                                                                                                                                                                                                                                                                                                                                                                                               |                 |
| Key results              | 18  | Summarise key results with reference to study objectives                                                                                                                                                                                                                                                                                                                                                      | 14, 15 & 16     |
| <b>Limitations</b>       |     |                                                                                                                                                                                                                                                                                                                                                                                                               |                 |
| Interpretation           | 20  | Give a cautious overall interpretation of results considering objectives, limitations, multiplicity of analyses, results from similar studies, and other relevant evidence                                                                                                                                                                                                                                    | 16 & 17         |
| Generalisability         | 21  | Discuss the generalisability (external validity) of the study results                                                                                                                                                                                                                                                                                                                                         | 17              |
| <b>Other information</b> |     |                                                                                                                                                                                                                                                                                                                                                                                                               |                 |
| Funding                  | 22  | Give the source of funding and the role of the funders for the present study and, if applicable, for the original study on which the present article is based                                                                                                                                                                                                                                                 | 18              |

\*Give information separately for cases and controls in case-control studies and, if applicable, for exposed and unexposed groups in cohort and cross-sectional studies.

**Note:** An Explanation and Elaboration article discusses each checklist item and gives methodological background and published examples of transparent reporting. The STROBE checklist is best used in conjunction with this article (freely available on the Web sites of PLoS Medicine at <http://www.plosmedicine.org/>, Annals of Internal Medicine at <http://www.annals.org/>, and Epidemiology at <http://www.epidem.com/>). Information on the STROBE Initiative is available at [www.strobe-statement.org](http://www.strobe-statement.org).
